# Supplementary material for: Genome-Wide Identification of WRKY Gene Family in Pitaya Reveals the Involvement of HmoWRKY42 in Betalain Biosynthesis
Source: MDPI journal article supplement (doi:10.3390/ijms231810568), 2022-09-12
Supplement: s1 [file s1]

**Supplementary Text S1.** Summary of WRKY members information in pitaya. Yellow highlights indicates specific primers for full length cloning of cDNA sequences. Underlining indicates sequence of *HmoWRKY* genes primers for real-time PCR. The downstream primer is the reverse complementary sequence.

>*HuWRKY1*

ATGGTTGCAAAGGAGGAAGCTCATGTGGTTGTTGCTCCTGAGGATAACTTGCAACACAGACCAAGCAC  
TGATTCTGCAGTGCATGCTTCCCACACTGACCAAGAAGAGAAGACACCTATTGTCCCAGAGAAACCAT  
CAGAAGACGGATATAATTGGAGAAAATATGGCCAAAAGAATGTCAAAGGAAATGAATACATACGAAGC  
TATTACAAGTGTTTCATATCCAACTGCCAGGTGAAAAACAAGTGGAGCGCTCGCCGACTGGACGGAT  
TACTGATGTTACTTACTTGGGGAAGCATGACCATGCTAAACCTCGCTCTGAAACCCAGGAAGCTGTCCC  
CTCTTTTCAGTCGGTACACTTACAGAAGCCAGATTGTCCTGTATCCACTGTTGAAGACAAGCCATCTGA  
TGCATGTGCCCTCACAACCTGATAATGTTCAACCTCAGCCAATGGATGTATGTAACCATCCAATAGTTGAT  
GAGGGTACTTCTACGACCTGTCTTCCAGCGGCAGATCTAGCCAAGGATGTTTCATAATGAAAATATGATC  
CTAAAGAGACGGAAGAAAAGCATCGATGGTGCTGATATCATAACAGAAAAACCTACTCATGAATCACG  
TCTTGTTGTCCATACGGTTAGTGAGTTTGATATCGTAAATGACGGGTACAGGTGGCGCAAATACGGACA  
GAAAATGGTCAAAGGCAATCCTAATCCACGGAGTTACTACAGGTGCTCTACAGCAGGATGCCCAGTCA  
AGAAACATGTGCGAAAGGGCTTCTCATGATCCGAAAGTCGTCATCACCACATATGAGGGTCAACATGATC  
ACAGTATACCTCCCATCAGGACCGTCGTCCCCCAGAGTGGAGCTCCATCTGGTGGCGGGATTGAATTGA  
ACGGTGTCAGTGGGACCAAGTCACAAGAGAGTGGTCAGAAGGGTTCAACAATGTGTGATGCCGTTGG  
TTCCACAGCAAAAAGAAGAAATCAACACCAAAGCAGCAGTTAAGATCGAGCCTGAAGTTTCACCTAGC  
CTGCAAGAACTGCAGCCCAAATCCAAAAGAAACAATCAAATTGAACATACTAGTCATGCAATTTACAGG  
TAGTGAGCAGCAAATGCAGGACGATCCCATTTCCAGTGTGTCAAATTCTGATAATGTTGATCATCAAAG  
TGTCAAACAAGAAAAAGGGGCCACAGTTCAACAAGTAAAGATGGGGGTTGTCTCAACCCAGGAGCAG  
AGGCCTGATCCACTTGTTGACAGGTCTCATCTTGAGACGAGATCAAGTGGCCAAGAAAGGCCTGCTGA  
GCCTGTTAATTGCTGA

>*HmoWRKY1*

ATGGTTGCAAAGGAGGAAGCTCATGTGGTTGTTGCTCCTGAGGATAACTTGCAACACAGACCAAGCAC  
TGATTCTGCAGTGCATGCTTCCCACACTGACCAAGAAGAGAAGACACCTATTGTCCCAGAGAAACCAT  
CAGAAGACGGATATAATTGGAGAAAATATGGCCAAAAGAATGTCAAAGGAAATGAATACATACGAAGC  
TATTACAAGTGTTTCATATCCAACTGCCAGGTGAAAAACAAGTGGAGCGCTCGCCGACTGGACGGAT  
TACTGATGTTACTTACTTGGGGAAGCATGACCATGCTAAACCTCGCTCTGAAACCCAGGAAGCTGTCCC

CTCTTTTCAGTCGGTACACTTACAGAAGCCAGATTGTCCTGTATCCACTGTTGAAGACAAGCCATCTGA  
TGCATGTGCCCTCACAACCTGATAATGTTCAACCTCAGCCAATGGATGTATGTAACCATCCAATAGTTGAT  
GAGGGTACTTCTACGACCTGTCTTCCAGCGGCAGATCTAGCCAAGGATGTTTCATAATGAAAATATGATC  
CTAAAGAGACGGAAGAAAAGCATCGATGGTGCTGATATCATAACAGAAAAACCTACTCATGAATCACG  
TCTTGTTGTCCATACGGTTAGTGAGTTTGATATCGTAAATGACGGGTACAGGTGGCGCAAATACGGACA  
GAAAATGGTCAAAGGCAATCCTAATCCACGGAGTTACTACAGGTGCTCTACAGCAGGATGCCCAGTCA  
AGAAACATGTGCGAAAGGGCTTCTCATGATCCGAAAGTCGTCATCACCACATATGAGGGTCAACATGATC  
ACAGTATACCTCCCATCAGGACCGTCGTCCCCCAGAGTGGAGCTCCATCTGGTGGCGGGATTGAATTGA  
ACGGTGTCAGTGGGACCAAGTCACAAGAGAGTGGTCAGAAGGGTTCAACAATGTGTGATGCCGTTGG  
TTCCACAGCAAAAGAAGAAATCAACACCAAAGCAGCAGTTAAGATCGAGCCTGAAGTTTCACCTAGC  
CTGCAAGAAGTGCAGCCCAAATCCAAAAGAAACAATCAAATTGAACATACTAGTCATGCAATTTACAGG  
TAGTGAGCAGCAAATGCAGGACGATCCCATTTCAGTGTGTCAAATTCTGATAATGTTGATCATCAAAG  
TGTCAAACAAGAAAAAGGGGCCACAGTTCAACAAGTAAAGATGGGGGTTGTCTCAACCCAGGAGCAG  
AGGCCTGATCCACTTGTTGACAGGTCTCATCTTGAGACGAGATCAAGTGGCCAAGAAAGGCCTGCTGA  
GCCTGTTAATTGCTGA

>HuWRKY2

ATGGAAGAGAGTGGTGATGGGC TTGAAGAGTGGAGGGATCTTGTGATGAGCCCTAACCCCTAAAGGGTT  
GTTCTCAGGTTTTACATCTGAGCCATGTGTTAGCAAATCAATCGATGATGCTTTGATTGGTGGGGAGGGT  
ATTTTGGGTGTTGATCATGAAGAAGTTGAGAATTCAATGTTGGATTCAAAGAGGAAAGTGCAGGGTACT  
AGTGAAAATGGGTGAATTCTTCTTCCATTGGCATGGGTGATTCTGCTGGCATTAAAGACAGGAGGGAGC  
ATAGCAGAGAGAAGGGCAGCTACATTTGGATTCAATGCTGCTAAAATCAGCAATCCTCGGTTTAGGTCT  
AGTAGCATGTTGCCTTCTCCAGGCGTTCGATCACCTTATCTGACCATAACCGCCTGGCATTAGCCCCACTG  
CATTGCTAAACTCTCCGATTATGGTATCCAATCCACAGCCTTCTCCAACCACGGGGAGTTTTGCATCACC  
TCCTATGGACAGGGGCAATGAAATGTTGATTTACAGCATCTCATGCAGAAATGGACAAGGTTAGAGATGA  
TGGTTTATCTTCCATGTTTAAGCCCAGAGTTGATCCCATTCTATGGATTGTGGCCTGGCTGCAGAAAAT  
CAGGTTTGTCTACTAGTGGTCTGGCTCAGAGTTTGGTTGCTTATCTTCAACATCAAAGTCTTACATCCA  
TGAATCTGCCAACGGACATCAAATTTCCACGGAAATCCCTACAGAAGTTACTGTGGACAATGACCTTG  
CTGGCTTACCACCAGAGGATTCAGGAGCCCACAATTCTTTGGACGGGGACCAGAAAGCTCCAACAAGT  
ACACTAAGAACTGCAGAGGACGAATACACTTGGAGGAAATATGGCCAGAAGCAAGTCAAGGGTAGTG  
AATATCCTCGGAGTTACTATAAATGCACCCATCAAAACTGTGAAGTAAAGAAGAAGGTAGAACATTCTC

ATGATGGCCAGATAATAGAGATCATCTATAAGGGTACCCATAATCATCCAAAACCTCAACCTAGTCGGAA  
ATCGACCTCATCATTCAGTGAGATATCTGACGCAAATGATGCTAAGGGATCTTCTATTAAAGTTGATGGT  
GGCTTAGTCTGGAGAAGTATAGAAAGTGGATCTAGGCACACTAAGATGGCATCAGATTGGAGAGCTGA  
TGGCTTGGAGAGGACATCTTCAACTTCCGTTGTCACTGAAGTTTCTGATCTACTGTCAACCACTCAAGG  
GAAGCTGATGGGTATGCATGAATCAGCAGGAACTCCAGAGTTCTTGTCAACACTGGCCATCCATGAGG  
ATGATGAATCAGAAGCAGCAGCACCACAAGGAAGGTTTTTCATTTGAAGATGATGGTGATAATGAACCA  
GATTCAAAAAGAAGGAGGAAGGAGGCTTGTTTTATTGAAACGACTTTAGGTTCCACGGCTGTTCGTGA  
ACCAAGAGTAGTTGTCCAAATAGAGAGTGATGTGGATATTCTTGATGATGGGTATCGTTGGCGAAAATA  
TGGGCAAAAAGTCGTCAAGGGAAATCCCAACCCTAGGAGCTACTACAAATGCACCAATGCTGGATGCA  
CTGTCAGGAAGCACGTGGAGAGAGCATCAGATAATTTGAAATGTGTGATAACGACATATGAAGGGAAA  
CACAATCATGCAGTGCCAGTAGCTAGAAACAGCAGCCACGCAAATTCAGGCAGCAGAAGTTTACCCCC  
TCCCGGGACTAATGCCCAGTCTGCCCTGACATTACCCAGACAACCCCATCTTCCAAAGGCTGAACCTCA  
TGTCCACGAACTTCCCCTCCATTTTGAGGAAAAAAAGGAGTGCAGCAATGACTTTCTAAGACCAAACCT  
TCCTAGGAAGTTTAGGAGGTGGAACCTACCCCATTTTACCAAATGAAATTCCTATTTTCTGCAGTGCAA  
CACCATCTGGTCCCTTTGGTTTGAGTAATCACCATCCAGGTTATTCTGGTGGCATCGTACCACTCATCCC  
AGAAGTTCCTATCCCATTGCCAGTAGGGCTTGCTCAATCTCCAAGTTTGTCCATCACTAATTACAACAAT  
TGTGGAAGATCGCTGTCTTCAGTTCAGCCCTTACATACTGCACACCAACTGGAGGAAAACAATGTCAA  
ACACAGAGATGACTTGATCTATGATACAGGAATGGAGAATACCGACCATGCAAACCCTTCATCATCCTC  
CATATACAACCATATTGCAAGGTCCTTTCCATTGTGA

>HuWRKY3

ATGCCGGAACGATGCCGTGACTTCCACGGAACCGCCGCCGGCGCCGGATGGCGGTGGGGCAGC  
TGCAGCCACCGACTATTACACTGCCGCCGCGTGGTGGGGTTCGACTCCATTTTTCTGGGTCCGGGTTCG  
GAGCTAGCCCAGGCCCCGATGACCCTGGTCTCCAGCTTCTTCTCTGAGAATGACCCGGATTCTGATTGTC  
GTTCTTTCTCTCAGCTCTTAGCTGGCGCCATGGCTTCTCCCCGACCGGCTTCCGAGAACAGCTCTAGTG  
AACCGGACCATCTCCGGTTCAGGCAGAGCAGGCCGGCCGGTCTGGTGGTTTCTCAGCAGCAAGGGGT  
TTTACCATTCCGCCCGGGCTTAGTCCTGCTAGCTTGCTCGATTCTCCTGGTTTATTCCCTGGTCAGGGG  
CCATTTGGGATGTCTCACCAGCAAGCGCTAGCTCAAGTTACGGCTCAAGCTGTACAAGCACAAGCTAA  
CTTGATGTGCAAGGCAATTTCCATCTTCCCTCGGTATAGGTCTTCCGGGATCATCTCCATTTCCAGCC  
TTTATCTCTGAGTCAATGCCACAAAATGTGACAAGTTCTGCGCTAGATTCTACCGAGATAAAAGAACCG

GCACAGTACTCTGGCATGGACCAAAGATCACAGCCTTCTTCCATGATTGTTGATAAGCCAGCTGATGAT  
GGCTATAATTGGAGGAAATATGGGCAGAAGCAAGTTAAAGGGAGTGAATTTCCCCGAAGTTATTACAAA  
TGTACACACATTAATTGCCCTGTCAAGAAGAAGGTGGAGCGTTCTCTTGATGGCCAAGTGACCGAGAT  
AATCTATAAGGGCCAGCACAAATCATCCGCCACCACAAAAACGTTCTAAAGAGAGCGGAAATTCTAATG  
GAAACTTGGGAAGTCAAGGAAACCCTGAATTAAACATGAATAGCACGAATGAGGGCATGACTTACTCA  
TTGTCTAGAAGGGATCAGGAATCTAGCCAAGCTACAGCAGAGCATTGTCTAGTGATGAGGAGGAAGT  
GGGCAATGATGAACTAGAGAATCTGAGGATGAACCTGATGCCAAGAGAAGGAACACAGAACTCCGG  
GTACCAGAGCAAGCTGTTTCACATAGGACAGTCACTGAACCCAAGATTATTGTTCAAACAACTAGTGA  
AGTTGATCTTTTGGACGATGGTTATAGGTGGCGCAAGTATGGACAAAAAGTTGTCAAAGGAAATTCATA  
TCCGAGGAGCTATTACAAATGCACTCACCCAGGGTGTAATGTTTCGTAAGCATATTGAGCGGGCAGCCTC  
AGACCCTAAAGCAGTGATAACAACATACGAGGGGAAGCACAGTCACGATGTTCCAGCTGCTAAGACG  
AGCAGCCATAACACATCCAACAGCAGCTTTTCACAGCCAAGACCGCCTAGTTTGGCAGCGAATAATAA  
CTCCTATGTTGGGAAGACGGATTTTACAAGTAATCAACAGCCTGTAGCCCTTCTCCATTTAAAACAAGA  
GAGAATAACATAG

>*HmoWRKY3*

ATGCCGGAAAACGATGCCGTGACTTCCACGAAACCGCCGCCGCGCGCGGATGGCGGTGGG  
GCAGCTGCAGCCACCGACTATTACACTGCCGCCGCGTGGTGGGGTCTGACTCCATTTTTTCTGGG  
TCCGGGTTCGGAGCTAGCCCAGGCCCCGATGACCCTGGTCTCCAGCTTCTTCTCTGAGAATGAC  
CCGATTCTGATTGTCGTTCTTTCTCTCAGCTCTTAGCTGGCGCCATGGCGTCTCCCCGACCGG  
CTTCCGAGAACAGCTCTAGTGAACCGGACCATCTCCGGTTCAGGCAGAGCAGGCCGGCCGGT  
CTGGTGGTTTCTCAGCAGCAAGGGGTTTTACCATTCGCCCCGGGCTTAGTCCTGCTAGCTTGC  
TCGATTCTCCTGGTTTATTCCCTGGTCAGGGGCCATTTGGGATGTCTCACCAGCAAGCGCTAGC  
TCAAGTTACGGCTCAAGCTGTACAAGCACAAGCTAACTGCATGTGCAAGGCAATTTTCCATCT  
TCCCTCGGTATAGGTCTTCCGGGATCATCTCCATTTCCAGCCTTTATCTCTGAGTCAATGCCACA  
AAATGTGACAAGTTCTGCCCTAGATTCTACCGAGATAAAAGAACCGGCACAGTACTCTGGCAT  
GGACCAAAGATCACAGCCTTCTTCCATGATTGTTGATAAGCCAGCTGATGATGGCTATAATTGG  
AGGAAATATGGGCAGAAGCAAGTTAAAGGGAGTGAATTTCCCCGAAGTTATTACAAATGTACA  
CACATTAATTGCCCTGTCAAGAAGAAGGTGGAGCGTTCTCTTGATGGCCAAGTGACCGAGATA  
ATCTATAAGGGCCAGCACAAATCATCCGCCACCACAAAAACGTTCTAAAGAGAGCGGAAATTCT  
AATGGAAACTTGGGAAGTCAAGGAAACCCTGAATTAAACATGAATAGCACGAATGAGGGCATG

ACTTACTCATTGTCTAGAAAGGGATCAGGAATCTAGCCAAGCTACAGCAGAGCATTGTCTAGTG  
ATGAGGAGGAAGTGGGCAATGATGAAACTAGAGAATCTGAGGATGAACCTGATGCCAAGAGA  
AGGAACACAGAACTCCGGGTACCAGAGCAAGCTGTTTCACATAGGACAGTCACTGAACCCAA  
GATTATTGTTCAAACAACACTAGTGAAGTTGATCTTTTGGACGATGGTTATAGGTGGCGCAAGTAT  
GGACAAAAAGTTGTCAAAGGAAATTCATATCCGAGGAGCTATTACAAATGCACTCACCCAGGG  
TGTAATGTTTCGTAAGCATATTGAGCGGGCAGCCTCAGACCCTAAAGCAGTGATAACAACATACG  
AGGGGAAGCACAGTCACGATGTTCCAGCTGCTAAGACGAGCAGCCATAACACATCCAACAGC  
AGCTTTTCACAGCCAAGACCGCCTAGTTTGGCAGCGAATAATAACTCCTATGTTGGGAAGACG  
GATTTTACAAGTAATCAACAGCCTGTAGCCCTTCTCCATTTAAAACAAGAGAGAATAACATAG

>HuWRKY4

ATGGCGTCCAACCTTATTTTCGACGGATTCTTGCTCATTCTCCGACCTCCTCAACGCAGAGATGAAC  
GCTCCGGTGCCGCCTTCCGGCCTGGGGCTTAGCTTTCTGTGCGAAAAAGCCGAGAATAGCGCCGGCGC  
CGGTGGTGGCTCATCTGGGTATAGGCAGAGTAAGCCGGCGAATCTGATTTTACCGGTGAACGTCTCGCC  
GGCGTTTTCTGTTTCGCCGGGGATTAGCCCCTCTCTTTTTCTCAACTCGCCACCTTCTTACAGTCCGCT  
CTGAACGCAACATATGGTACGTCTCCCCAACAGGTACTGCAAGTAACTGCTCAAGCAGCACTTTCCAAT  
TCCCATTTGGGCATCCAACCTGACTTCTACCCATCTTCATTAAGCCCAACCCCGCTGCATCCATCTATGA  
CTTACCAGTCGTCCACTTTTAATACTATATCGCGTATTCCCGAACGCCCAAATGCCCTCCACCACGAAAA  
GAGGCACCAGAGCTTCCCTGCACCCGTTGACAAGCCGGCTGATGATGGGTACAACCTGGAGGAAATACG  
GGCAAAAACAAGTCAAGGGAAGTGAATACCCTAGAAGCTATTATCGATGTACTAGTCCTAATTGCCCTG  
TTAAGAAAAAGGTGGAGCGGTCCTTCGATGGGCATATAACTGAGATCATCTACAAAGGCCAGCATAATC  
ATGATCCCCCTCCATCTGGAAGAAGAGGAAAAGACAACAATGCTTTGCTTGATCATGGTGGGTCTCAG  
GGCCAGATGGGTAACTTCCATTGGTCAACCAGGCTAGGGAGGGACCATGATTCAGCCCAAGCCACATC  
GATGCAGCTAAATGGCCCAAGTGATAGTGAAGAATCGGGTGAAAATTATGATCTAGCTGATGAGGAAGA  
TGATGAGGACAAGCCAAATGCCAAGAGAAGGCAAGTATATTATTCAACAAATGTTCTTCAAGGACATAT  
TTTGGTTTTTTTAAGACCATCTGACGTCCCTTTACGCACAGGACAATGACGGAGCCAAAAATTGTTGT  
GCAGACGAGGAGTGAGGTCGATCTTTTGGACGATGGCTATAGATGGCGCAAGTATGGGCAGAAGGTG  
TCAAAGGCAATCCTAATCCAAGGAGCTATTATAAGTGTACCACTGCAGGGTGCAAAGTCCGCAAACAT  
GTAGAGAGGGCATCTACTGACCCAAGAGCGGTGATAACTACCTATGAAGGGAAGCACAAACCATGATGT  
GCCAACTGCTAGAGGCAGCAATGCTAACACCATTAACTCCCAAAGTTCAACAGACTAG

>HuWRKY6

ATGGACGGTGGAGGATGGGCTTCATCACTTGCTCTTCAATCTGATCATCATCATCATCATCAAAGAA  
ATCTTACTTCTTTCTTAGGTAAAACAAACCCTACTACTCCTACTACTACAAGGATCAGGATGAGCAATAA  
TCAGACGTTCCCAGGCGTAGAATTCCCAGTGAACCTCAACCTCAGAGGGGATCATGATCATGATTATGA  
TCATGATCACAAACATGAGGATGAGGATCATGAGGATCGTAAAGTGGCGGTTGGTGAAGTAGATTTCTT  
CTCTGATCATCATCAGAAGAATAACAATAATAATAATAAGAGCAGTTTGGTCAGTAATAATAGCCGT  
GTGATCAAGGAAGAGAATTCTCCTCGTGATCATCATAATCGTGCTCCTGCTCCACCTGATCATCCCTCCA  
CCAGACCTCACCTCGATGTTAATACTGGTCTACGTCTCCTCACAATAACGGGAAGCGATCAATCTA  
CTATAGATGATGGTACTTCTTCGGATGCAGAAGATAAACGAGCTAAAAATGAGCTTGTTGTGCTTCAAG  
CCGAGCTCGAAAGGATGAATGCTGAAAATCAAAAATTAAAGACCATGTTATCTCAAATAAGCCAGAATT  
ATAGCACTCTTCAAATGCACCTCGTGACATTGATGCAGCAACAACAACAACAACAAAGAGTACGCAA  
AATGAGGGAATGCAAGGAAAGGGGGATCAAGATAATAAGCAAATAGTGCCCCGCCAATTCTTAGATT  
AGGCCCAAGTGAGAACAACGAGTCGATAGATGGAATGACATCTGAGGATGAGAGAACCGTAGATCGCT  
CGGGCTCTCCTAGGAAGAGGATAAGGGAGGATAGTCCTGAAGACTCGGACCCTCAAGGGTGGGTTTCC  
AGTAAGGCACCCAAGTTGGGTGCCTCTAATATGGGTGCCCCAACAAGGGCACTAGCCCCCAGCTGA  
ACAAGCACCCGCTGAGCTAGCCACAATGAGGAAGGCTCGTGTCTCAGTTGAGCTCGATCCGAAGCA  
CCTATGATAAGTGATGGATGTCAATGGAGAAAATATGGACAAAAGATGGCAAAGGGGAATCCTTGCCCT  
AGAGCTTATTATCGGTGCACGATGGCTATTGGTTGTCCGGTTCGCAAACAAGTTCAAAGATGTGCGGAG  
GACAGGTCAATATTGATCACAACTATGAAGGCAACCACAGTCATCCACTGCCACCGGCAGCCATGGC  
AATGGCCTCAACAACCTCCGCGGCAGCGAGCATGCTCCTATCGGGCTCGATGCCTAGTGGGGACGGGC  
TCATGAATCCAACTTTCTCGCTAGGACCATCCTCCCATGCTCATCAAGCCTGGCCACAATCTCAGCCT  
CAGCCCCCTTCCCGACTGTGACCCTAGACCTAACCCTCACCCAACCCTCTCCAAATACAAAGGCCAT  
CAGTACTGCACCAACCAGCCAGCCACTTCCAAGTCCCCCTCCCCCAACCCCAACCCCAACCCACCGCC  
GGTCACGTGTGATCCCTCCCAACTTTATCAACTCAATGCCTCAAATATTTGGGCAAACCCTATTTGCCA  
ACAATATGAACCAATCCAAATTCTCAGGGTTACAACTTCATCCTCCCAAGGCCTTGATGCTATGTTACA  
TGTTGGCGGGACCGGATTCCCCGACACCTTGAGCGCCGCCACCGCCGCCATTGCCTCCGATCCCAACT  
TCACGGCAGCCCTTGCGGGCCGCCATCTCATCGATCATCGGTGGGGTCCGCCCTGGGGAAAACAATAAT  
GCCAATCATTCTTCAGGTGGTGCAAATACTACTAGTGGTGATAACAACAAGGGTAATAATGTGAATTCTA  
GTAGTGGCATGCAACAACAACAATAA

>HuWRKY7

ATGGCAGTGGAGCTTATGGCAAGCTCCTCCTCTTACAAGGAGAGCTTCGCAGCTCTAATGGAGGAAAA  
CGCGGTCAGAGAAGCCGCCGCGGCCGGCCTTCAGAGCGTCGAGAAGCTCATCAAACCTCATCTCTCAGA  
TGGACAACCAGCACCAACACCTCCTCACTCAACAACAACAGCAACGACTCTAGAAACTCCTC  
GATCCGATTTCGATGATTCCGATTACAAGGCGGTGGCGGACGTCGCTGTCAACAGGTTTCAGGAAGGTAA  
TCTCTCTCCTCGACCGCACTCGCACCGGCCACGCGCGCTTCCGGCGCGGTCCGCTCTCTTCACCGCCTC  
CTCCTCCGCCGCCACTTCCGCTGAAGCCGATCATCCACGGCGGCGCAGGCTCGGCCTTCACGAGAGTC  
CACGGCGGTGGAGCTTCTCAGATCCAGCGCCTGCCGCCGCTTCCGCAGCCGAAGACGGTGGCGGAGA  
AAAAGGAATCGGCATCGACGACGATCCATTTCTCGACGTCACCGCCGATGTCCGCCGCGAACTCGTAC  
ATCTCGTCGTTGACCGGCGACACCGAGAGTTTGCCGGCGTCGATGTGCTCCGGCGGGTTTCAGATTAC  
GAATTTGTCGCAGGTTTCTTCCGCCGGAACCGCCTCTCTCGTCTTCGTCGTTGAAGCGGAAGTGTA  
ACTCCATGGATGACTCCAAGTGTGGCGGTCTTCTGGACGTTGCCATTGCTCTAAGCGAAGGAAATCA  
AGGACAAAGAGGGTGGTAAGAGTACCAGCAATAAGCTTGAAGATGGCGGATATTCCACCGGATGATTA  
CTCCTGGAGGAAGTACGGTCAGAAGCCAATCAAGGGGTCTCCTCATCCAAGGGGATATTACAAGTGTA  
GTAGCGTGCGGGGGTGTCCAGCAAGGAAGCATGTGGAGCGTGCATCGGACGATCCATCGATGCTGATC  
GTGACGTACGAAGGCGATCACAACCATTCCTGTCCATCACTGATGCGTCCGCAGCAGCTGCCATGGT  
CCTCGAATCATCTTAG

>HmoWRKY7

ATGGCAGTGGAGCTTATGGCAAGCTCCTCCTCTTACAAGGAGAGCTTCGCAGCTCTAATGGAGGAAAA  
CGCGGTCAGAGAAGCCGCCGCGGCCGGCCTTCAGAGCGTCGAAAAGCTCATCAAACCTCATCTCTCAGA  
TGGACAACCAGCACCAACACCTCCTCCTCACTCAACAACAACAGCAACGACTCTAGAAACTCCTC  
GATCCGATTTCGATGATTCCGATTACAAGGCGGTGGCGGACGTCGCTGTCAACAGGTTTCAGGAAGGTAA  
TCTCTCTCCTCGACCGCACTCGCACCGGCCACGCGCGCTTCCGGCGCGGTCCGCTCTCTTCACCG  
CCTCCTCCTCCGCCGCCACTTTTCGCTGAAGCCGATCATCCACGGCGGCGCAGGCTCGGCCTTCACGAG  
AGTCCACGGTGGTGGAGCTTCTCAGATCCAGCGTCTGCCGCCGCTTCCGCAGCCGAAGACGGTGGCG  
GAGAAAAAGGAATCGGCATCGACGACGATCCATTTCTCGACGTCACCGCCGATGTCTGCCGCGAACTC  
GTACATCTCGTCGTTGACCGGCGACACCGAGAGTTTGCCGGCGTCGATGTGCTCCGGCGGGTTTCAGA  
TTACGAATTTGTCGCAGGTTTCTTCCGCCGGAACCGCCTCTCTCGTCTTCGTCGTTGAAGCGGAAGT  
GTAATCCATGGATGACTCCAAGTGTGGCGGTCTTCTGGACGTTGCCATTGCTCTAAGCGAAGGAAAT  
CAAGGACAAAGAGGGTGGTAAGAGTACCAGCAATAAGCTTGAAGATGGCGGATATTCCACCGGATGAT

TACTCCTGGAGGAAGTACGGTCAGAAGCCAATCAAGGGGTCTCCTCATCCAAGGGGATATTACAAGTG  
TAGTAGCGTGCGGGGGTGTCCAGCAAGGAAGCATGTGGAGCGTGCATCGGACGATCCATCGATGCTGA  
TCGTGACGTACGAAGGCGATCACAACCATTCACTGTCCATCACTGATGCGTCCGCAGCTGCTGCCATGG  
TCCTCGAATCATCTTAG

>HuWRKY8

ATGCATCTTCTTCTTCTTTATTATGTCATCTTCAAACCTATATATTCCCCACCAACCCCGGCCATCCCCTCT  
CTCTCTCTCTCTCTCTCTCTCTCGCGTCTCAATCATGGAAGGTTTCTCATCCAAGTTTAGCTCTTCGA  
CTAACTCAGGCTCAGCATCATCTTCTGCTACTAATATCTTCCCTTTTGATGGAGAATATTATGATCATCAA  
CATCATCATCAAAATGATGGGCAGTTGATTAATGGTATGATGATGACGATGATGATGGACCAGCAAGATG  
CGCAAGAGCAGCTGAATCAACGGCAGAGATTGGACTTGGCTCCGGTGGTTCGATCCCAGCCCTTGATC  
GATGATAAAAGTAACAATACTAATGGTTACTTATCGTGTAATTACAATCATCATCATCATCATCATCAT  
CAAAATGATGATGACAAAAGTAATGATGGTGCTGAATTGAAGAAGAAGAAGAAGGGAATAGCAGCATT  
AGAGAAGAAGATAAGGAAGCACAGATATGCGTTTCAAACCAGGAGCCAAGTTGATATACTGGATGATG  
GCTACAGGTGGCGAAAATATGGCCAAAAAGCCGTCAAAAATAATAAGTTCCCAAGAAGCTACTATCGA  
TGCACACATCAAGGATGTAATGTGAAAAACAAGTTCAACGGCTAACAAAAGATGAAGGTGTTGTCGT  
CACCCTTACGAAGGAATTCATCTCATCCTATTGAAAAGTCTACGGACAACCTTGAGCACATCCTGAC  
CCAAATGCAAATCTACACTTCGCTTTAA

>HmoWRKY8

ATGCATCTTCTTCTTCTTTATTATGTCATCTTCAAACCTATATATTCCCCACCAACCCCGGCCATCCCCTCT  
CTCTCTCTCTCTCTCTCTCTCTCGCGTCTCAATCATGGAAGGTTTCTCATCCAAGTTTAGCTCTTCGA  
CTAACTCAGGCTCAGCATCATCTTCTGCTACTAATATCTTCCCTTTTGATGGAGAATATTATGATCATCAA  
CATCATCATCAAAATGATGGGCAGTTGATTAATGGTATGATGATGACGATGATGATGGACCAGCAACATG  
CGCAAGAGCAGCTGAATCAACGGCAGAGATTGGACTTGGCTCCGGTGGTTCGATCCCAGCCCTTGATC  
GATGATAAAAGTAACAATACTAATGGTTACTTATCGTGTAATTACAATCATCATCATCATCATCATCA  
AAATGATGATGACAAAAGTAATGATGGTGCTGAATTGAAGAAGAAGAAGAAGGGAATAGCAGCATTAG  
AGAAGAAGATAAGGAAGCACAGATATGCGTTTCAAACCAGGAGCCAAGTTGATATACTGGATGATGGC  
TACAGGTGGCGAAAATATGGCCAAAAAGCCGTCAAAAATAATAAGTTCCCAAGAAGCTACTATCGATG  
CACACATCAAGGATGTAATGTGAAAAACAAGTTCAACGGCTAACAAAAGATGAAGGTGTTGTCGTCA  
CCTTACGAAGGAATTCATCTCATCCTATTGAAAAGTCTACGGACAACCTTGAGCACATCCTGACCC  
AAATGCAAATCTACACTTCGCTTTAA

>HuWRKY9

ATGGACTCATCTAAGTGGATAC TCAATCCCCCTCTCGGGTTCAATCTTAACCTTAGTCTTTCTGATTTCGG  
ATTCTCTTAGATGCGAATCAAGAAGTCCATCAAATGATGCGATTTTATGTCAACAGGTGACGAACAAAG  
AGAGTGAGAACCTAGTGGAGAAGATGGACAGAATGAGAACAGAGAACAAAGAAATTGACACAAATGTT  
GACATCAATGTGTGAGAATTACAATGTTTTGCAAAGCCAGTTGGTGAATTTGTTGAGTCAAACCTCCAAA  
AGCTGAAAATAGAGATGATTATCTTAAGAAAAGGAAGGCTTGTTTTGAGGCTATCGATGGTGAAGATAT  
TCAGGGGAGTTCAGAGCATAGCTGCATCAGCTACGAAGATTCATGTAAAAGAGCAAGGCTGCTAAGTT  
CTAAGCCTAAGGTGTCAAAGATCTTCGTTCTGAACTGAAAAATCCGATACGAACTGGGTGTGAAGGAT  
GGATATCAATGGAGAAAATATGGGCAAAGGTCACAAAAGATAACCCAAGTCCTAGAGCCTACTTTAA  
ATGTGCCAATGCCCCCTATGTGCCCCGTGAAAAAGAAGGTGCAAAGAAGCATCGAGGACCCATTCATATT  
GGTTGCAACATATGAAGGGGAGCACAACCATGCAAAGATACAGACCAAGTAGTCTTAGGCTCAAGTC  
ACTGTTCCATTACTCATGCAAACGCTAGCATGATCCATAATGAGTTGATGATGAACCCTAATTTGCCTAA  
CAAGACTATGGATGACTATCAAATCCGCCAAGCGTGGACTTTGATATCAAACACTACATCGATCGTT  
GGTGGATAAAATGGCTGCTTCATTAAGTAGAGATCCTTGTTTCACATCTTCATTAGCAGCAGCGATATCT  
GGGAAGATGTTAGATGACAGTCATTCTAAGAGATGGCTTTAA

>HmoWRKY9

ATGGACTCATCTAAGTGGATACTCAATCCCCCTCTCGGATTCAATCTTAACCTTAGTCTTTCTGATTTGGA  
TTCTCTTAGATGCGAATCAAGAAGTCCATCAAATGATGCGATTTTATGTCAACAGGTGACGAACAAAGA  
GAGTGAGAACCTAGTGGAGAAGATGGACAGAATGAGAACAGAGAACAAAGAAATTGACACAAATGTTG  
ACATCAATGTGTGAGAATTACAATGTTTTGCAAAGCCAGTTGGTGAATTTGTTAAGTCAAACCTCCAAA  
GCTGAAAATAGAGATGATTATCTTAAGAAAAGGGAGACTTGTTTTGAGGCTATCGATGGTGAAGATATT  
CAGGGGAGTTCAGAGCATAGCTGCATCAGCTACGAAGATTCATGTAAAAGAGCAAGGCTGCTAAGTTC  
TAAGCCTAAGGTGTCAAAGATCTTCGTTCTGAGCTGAAAAATCCGATACGAACTGGGTGTGAAGGATG  
GATATCAATGGAGAAAATATGGGCAAAGGTCACAAGAGATAACCCAAGTCCTAGAGCCTACTTTAAAT  
GTGCCAATGCCCCCTATGTGCCCCGTGAAAAAGAAGGTGCAAAGAAGCATTGAGGACCCATCCATATTG  
GTTGCAACATATG

>HuWRKY10

ATGACAAGACTCCGACCCCG CGTTGTCAGGGCACGGTGGAACCTATTTTAATCGAAAAAAGAAAAAGG  
AAAAGCAAAAAGCAAAATCATTTATTGAGTCCCTAAAAAGCGAAACGACGTCGCTCTATGCTCCCGCT  
TTTCTCTCTTTCTCTCTCTTTTCTTTTCAGATCCGTTGGAACCTAGTCAACACTCTCACGGCTCCACTCTCT

CTCTGTCTCTCTCTCCCCGCCTTTCTCTCTCCTCTGTCCATTCCCAAACCTACCCTTCTCTCTCTTCGCTAT  
CCATCCTCAGCGTCAGCGTCACAGGTGAATTGCCCCGGCGAATGCGGTGATGGAAGCCGCTCCGTCCGT  
CGCTCCGTCAACGTCTGGGTTGATGATGGCCACCGTAGACGGCGGCGATTGAGGAGAGCTGCCACCA  
ACGACGGCGGAGGCGGATCTAGTAATGCCAAGTACAAGCTGATGTCCCCGGCGAAGCTTCCGATCTCG  
AGGTCTCCTTGCCCTACCATTCCCTCCTGGACTCAGTCCGACGTCGTTTCTTGAGTCCCCCGTCCTTCTCT  
CCAACTTCAAGGGAGAGCCTTCCCCAACAACCTGGTTCTTTTTTCCATCCTCAGATGATGAACTTCTCTT  
CTGGTGGCTCTACGGCATTCCCTTCTATCATAAATAGCTCCGGTAGCCTGGATGATATTAAATCGAGTGG  
CTTTGAGTTCAAACCTGGTCCAGGATCATATTCCACTGCAAACCTTTTCTATGGCAGGGCATGTGGTTCCT  
TCTGCAGATATGAATCAACAGCAAGTTGCACAAGCTGCACAAGTCCAATCGGAGTTCCAGTTGCAAGC  
ATCTGACACATCCATAACTGTTAAAGACGAAGTTCCGGTCTCAAATGAGCTCCAGTCTGTAGTGGTTGC  
TTCAGCTTCTCAGGCATCACCTGATATTGATTCTAATGAAATAAACCAAGGAGAAGACTCCAATAATGA  
AGCCCAGGTGCCACAATCTGAGCAGAAAGTAGGAGGATCTCATGTCATAACTGATCGAACATCTGATGA  
TGGATATAATTGGAGGAAATATGGACAGAAGCTTGTCAAGGGAAGTGAATACCCACGAAGTTATTACAA  
ATGTACACATCCGAATTGTGAGGTCAAAAAACTGTTTGAGAGGTCACCTGATGGACAGATAACAGAGA  
TCATCTACAAGGGTACACATGATCACCCAAAACCTCAACCGAATCGTCGACTTGCTGCTGGTTCTCTGG  
TGTCAGCGCACGACGAGAAGTCAGAGAGAGTTCTGTGCTTACTGATCAAGAAGCCAAGCCTGCAAA  
CTTGTTTGGCCAATCAGCCGGCAATGACGAGAGCAGCACTCCTGATATACTCCCTGGTGGAGCAAATG  
ACAATAATGGAGAAGGTGGTCTTCTAAATAGAAGCACTGATGATGCTGATGATGATGATCCATTTGCAA  
AGAGGAGGTATTGGATATCTTCAGCATTTCCGTAAATATATGTAACCATAGGCAGGGCAATGAACTTAT  
ATTCCTTGTTATCAGGAGGATGGAAGGCGGTGAAATGGACTTCAATTCGGTAGTGAAACCTATTCGAGA  
ACCACGTGTTGTTGTTCAAACCTGTGAGTGAGGTTGATATTCTTGATGATGGGTACCGATGGCGTAAGTA  
CGGCCAGAAGGTGGTGAGAGGCAACCCTAATCCAAGGAGTTATTACAAGTGCACTCATCCAGGATGCC  
CAGTTCGTAAACATGTAGAGAGGGCATCTCATGACCCTAAAGCAGTGATAACAACATACGAGGGGAAA  
CACAATCATGAAGTACCGACTGCAAGGAATAGCAGCCATGACACAGTGGCTACAGCAACCGCGAGTCT  
GGCAACCCGAATTGGGTCACATGAAGGTAGTGAACAAGTAAGCCTCGATCTTGGGGTCGGGATTAGGT  
CTGCTCCTGAATTTGTACAGGGTCAGCAGCTGGCAATGGAACCTGAGCGCATTCCCGGCCAAACCCAT  
TTCAGCAGTCCAAATCTCTTATTGCTTCAACAACCTCCTCTTTCAACTTTTCCTAGTTATGTGAATGGTG  
GTATGGTGCTTTATGGTTCTAGGGAAAACCATAGTCAAGCTCATAGTGTTGGTAATGCACCTGTAAATCA  
CTCTTCTAATTCGTATCAGCAGAACCTGGGAA

GAATACTCATGGGTCCATAG

>HuWRKY11

ATGGCTATAGATCTCATGGTAGGCTACAAAAACGACGCCGCTGCTTCCCTTTCTCTCTCCTCTCAAATGG  
AGGATACCCAAGCCCAAACCATCGCCACGAAGCTTCCAAAGGCCTCCAGAGCGTCCACAATTCATC  
AACCTTCTCTCCAAATCTACTGACAATTCTCAACCTGCCAAGTCAGCTGGCACCATGGACATCGACCTT  
AACTGCAGGGCCGTCGCCGACGACGCCGTTTCAAGATTCAAGAACGTCATCTCTCTCCTCGGCCGGGC  
TAGGACGGGCCACGCCAGGTTCCGCCGGGGCCCCGTTTCACCGCCCCTCTCTCCTCCGAAGCGGGGCG  
GCGGCGACGTCGTGGTGTGTGTCCTAAGCCAATCCAGCAGGTTCCGCCGGTTCAGACCGGCTTTGAT  
TTTAAACCGGCGGCGGTGATAAATTCGCGTACTCGTCGCCGGTGTCTCCTCCGCCGGGAACTCGGTG  
AAGTCAACGTTGACCGGCGAGACGGATAGCAAGCAGAACACAACGGCTACTACTACAACAACGACGT  
CGTTTCAGATAAGCCATTATTCGGGGATGTCCTCGGCTGGGAAGCCGCCTCTGTCTCATAACGACGTCGT  
TTAAGGTGAGGAAGTGCCACTCTGAGAACGGCAAGTGTGGTGGATCTTCTGGTCGTTGCCACTGCTCT  
AAGAAAAGGAAGTTGAGGTTGAAGAGGGTGGAGAGAGTACCGGCAATAAGTTCAAAGATGGCAGAC  
ATACCACCGGATGACTATTCCTGGAGAAAATACGGTCAAAGGCCATCAAAGGCTCCCCACATCCAAG  
AGGGTACTACAAATGCAGTACGGTTAGAGGGTGCCCAGCTCGGAAACACGTAGAGAGGGCGTTGGAT  
GATGCGAACATGTTGATCGTCACCTATGAAGGGGAGCACAACCATGCTCTGTCTATTGCTGAAAGCGTCT  
ATTCTCGAGTCATCTTAA

>HmoWRKY11

ATGGCTATAGATCTCATGGTAGGCTACAAAAACGACGCCGCTGCTTCCCTTTCTCTCTCCTCTCAAAT  
GGAGGATACCCAAGCCCAAACCATCGCCACGAAGCTTCCAAAGGCCTCCAGAGCGTCCACAATTTCA  
TCAACCTTCTCTCCAAATCTGCTGACAATTCTCAGCCTGCCAAGTCAGCTGCCACCATGGACATCGACC  
TTAACTGCAGGGCCGTCGCCGACGACGCCGTTTCAAGATTCAAGAACGTCATCTCTCTCCTCGGCCGG  
GCCAGGACGGGCCACGCCAGGTTCCGCCGGGGCCCCGTTTCATCCCCCACTCTCCTCCGAAGCGGGG  
CGGCGGCGACGTCGTGGTGTGTGTCGAAGCCAATCCAGCAGGTTCCGCCGGTTCAGACCGGCTTTG  
ATTTTAAGCCGGCGGCGGTGATAAATTCGCGTACTCGTCGCCGGTGCTCTCCTCCGCCGGGAACTCGG  
TGAAGTCAACGTTGACCGGCGAGACGGATAGCAAGCAGAACACAACAACGACAACGGCTACTACTAC  
AACAACGGCGTCGTTTCAGATAAGCCATTATTCGGGGATGTCCGCCGCTGGGAAGCCGCCTCTGTCTCA  
TACGACGTCGTTTAAAGGTGAGGAAGTGCCACTCTGAGAACGGCAAGTGTGGTGGATCTTCTGGTCGTT  
GCCACTGCTCTAAGAAAAGGAAGTTGAGGTTGAAGAGGGTGGAGAGAGTCCCGGCAATAAGCTCAAA  
GATGGCAGACATACCACCGGATGATTATTCCTGGAGAAAATACGGTCAAAGGCCATCAAAGGCTCCC  
CACATCCAAGAGGATACTACAAATGCAGTACGGTTAGAGGGTGCCCAGCTCGGAAACACGTAGAGAG

GGCGTTGGATGATGCAAACATGTTGATCGTCACCTATGAAGGGGAGCACAACCATGCTCTGTCTATTGC  
TGAAGCGTCTATTCTCGAGTCATCTTAA

>*HuWRKY12*

ATGTTGAACCAGGAGAACTTGATTGATCAAGACGATGATCAAGGGATGATGATGATGTCTTCCCAAATG  
GGTTTCTCTCAAAACCCTATGATCAACTCAACTAATAATCCGACAACCACAAGCTTTGCCCCTCTTGTTT  
CTTCTTTTGCATTAGATCATGCAACTTTTAGTACTCTCACTCAAGGCCTCCTTTCTTCCATCTCTCCAGTT  
CCAAAGCCACCGTCTAGCATGCTTACTCTACCTTTTTCTCCCCAAAAATCAACCACAAATCCATGGGCA  
TGGAAGAAAAGGAGGAGAGCCAAGGGGTGAATAGGAGAAGCATGACCAATGGACTGGAGCAACCT  
CCCACGGTATCCGCGATGAAGATGAAGAATAAGATCAAAGGGAGAAGGAAGGTTAGAGAGCCAAGAT  
TTTGCTTCAAGACCTTGAGTGATGTGGATGTCTTGGATGATGGTTACAAATGGAGGAAGTATGGCCAAA  
AAGTAGTCAAGAACACCCTTCACCCAAGGAGTTACTACAGATGCACGCAGGACAACCTGCAGGGTGAA  
GAAGAGAGTGGAGAGATTAGCAGACGATCCGAGGATGGTGATCACCACCTATGAAGGAAGACATGCTC  
ATTCTCCCTCCCATGACCTTGAGCAAGATTCACAGCAGACCCCTCATCCCTTTCTCAATAACTTCTTTTG  
GTAG

>*HmoWRKY12*

ATGTTGAACCAGGAGAACTTGATTGATCAAGACGATGATCAAGGGATGATGATGATGTCTTCCCAAATG  
GGTTTCTCTCAAAACCCTATGATCAACTCAACTAATAATCCGACAACCACAAGCTTTGCCCCTCTTGTTT  
CTTCTTTTGCATTAGATCATGCAACTTTTAGTACTCTCACTCAAGGCCTCCTTTCTTCCATCTCTCCAGTT  
CCAAAGCCACCGTCTAGCATGCTTACTCTACCTTTTTCTCCCCAAAAATCAACCACAAATCCATGGGCA  
TGGAAGAAAAGGAGGAGAGCCAAGGGGTGAATAGGAGAAGCATGACCAATGGACTGGAGCAACCT  
CCCACGGTATCCGCGATGAAGATGAAGAATAAGATCAAAGGGAGAAGGAAGGTTAGAGAGCCAAGAT  
TTTGCTTCAAGACCTTGAGTGATGTGGATGTCTTGGATGATGGTTACAAATGGAGGAAGTATGGCCAAA  
AAGTAGTCAAGAACACCCTTCACCCAAGGAGTTACTACAGATGCACGCAGGACAACCTGCAGGGTGAA  
GAAGAGAGTGGAGAGATTAGCAGACGATCCGAGGATGGTGATCACCACCTATGAAGGAAGACATGCTC  
ATTCTCCCTCCCATGACCTTGAGCAAGATTCACAGCAGACCCCTCATCCCTTTCTCAATAACTTCTTTTG  
GTAG

>*HuWRKY13*

ATGTTGAACAGCCAAGGTTTACTCTTCGAGGATAGTCAAGCTGGGATCATGTCCACCCAAATGGGGTTT  
TGCCTAAATCCTACGAACTTGACTTCCAGCCTTGTTGCTCCTCTTGCTTCTCATCAAGACCAACAATATG  
TTAAGCCCTTCATCAATAATATCATACCTTCTTTGTTTGGAAATGGATCAGGTTTCCTCCACTCTCACTCAA

CTTAGTAAC TTCTTCTGTTAG

ATGTTGAACAGCCAAGGTTTACTCTTCGAGGATAGTCAAGCTGGGATCATGTCCACCCAAATGGGGTTT  
TGCCTAAATCCTACGAACTTGACTTCCAGCCTTGTTGCTCCTCTTGCTTCTCATCAAGACCAACAATATG  
TTAAGCCCTTCATCAATAATATCATACCTTCTTTGTTTGGAATGGATCAGGTTTCCTCCACTCTCACTCAA  
GCGCTTTTGTCTTCTACCTCTCCAAAGCCTAGAGAAGACCTCATTCCTCATCTTATAACATGCCTCAAC  
TGGTCTCTCCTCAAAGATTTACTCCGAATATGTGGGCATGGGGAGGGCAAAGGAGGGCCAAGGAATG  
GAGAAGAGACCAAATGGGGAGAATCCTCAATCTCTAGGGGTATCGATGAGGAAGATGAAAAGGGTAA  
AAGGGAGAAGGAAGGTGAGAGAGCCAAGATTTTGCTTCCAAACCATGAGCGATGTGGATGTCTTGAT  
GATGGATACAAGTGGAGGAAGTATGGCCAAAAAGTTGTGAAGAACACCCTTCATCCAAGGAGCTATTA  
TCGTTGCACACAAGACAACCTGCAGGGTGAAGAAGAGAGTGGAGAGACTGGCAGAGGATCCGAGGAT  
GGTGATCACCACCTATGAAGGACGCCACATCCATTCTCCCTCACACGACCAGCTCGACGAGTCACAAC  
CTCAACCTCTTCTTAGTAACTTCTTCTGTTAG

[illegible]

AAGAGCCAAGCCAAGAAAGTAGTGTGTATACCAGCACCAACAGGAGCACATAGCAGGCCAAAGTGGAG  
AAGCAGTTCCATCTGATCTCTGGGCTTGGAGGAAATATGGTCAGAAACCTATTAAAGATTCTCCTTATCC  
CAGAGGCTACTATAGATGTAGTAGCTCTAAGGGGTGTTTCAGCAAGAAAGCAAGTGGAAAGGAGTCGA  
ACGGACCCGAACATGTTGGTTATTACATACACCTCGGAGCACAATCACCTTGGCCAACCTCAGAGGAA  
CGCCCTTGCTGGATCAACGCGCTCTCAAACATCCAAGAATATTGCTACTGCACTCACCTCTTCGAAGCT  
CAACAAAGCACTCGTCCAGGAGGAAGTCAGCACTAACAAGGAGATTAGCCAGGCGAAAACTTTGTC  
GAAGAAGAGATGAAGATTGAGAAGCAAGTAGAGGAAAAAGGGGAAGATCTTAGTTTGACGGTGAGTT  
ATAAGCCCACATTGCATGAACTGAATGGTAAGCAGCCTCAACAGGACTTGTCTATGGAGTTGGGTTTCG  
ATGGCGACGACCCTCTTGATCTCATATTCACCCAAGAAATCAAATCATTGGATCCCTTTAATGGTCTCTT  
TGATTGGGATGCACCACAAAGTGCCATGGTCCAAGGTAATG**GCAACCAAGAAAAAAGGGTTTCTTGA**

>HmoWRKY14

[illegible]

>HuWRKY15

ATGGCTGTAGATCTCATGTTGGGTTACAGCAACTCCTCCTCCTCTAATAACCGTTCTCTCTCCTCTAAAA  
TGGAGGAAGCCATCGCTCAAGAAACCGCCGCTGGTCTTCAAAGCGTCGAGAATTTCTGTC AACCTCCTA  
TCCAAACAGTCGCACCATCAACCTAAACCAGAGGCCATGGAAATCGATCTCAACTGCCGGGCTGTGGC  
GGACGACGCCGTTTCCAGGTTCAAGAAGGTCATCTCTCTCCTGGGCCGAGCTCGGACGGGCCACGCCC  
GCTTCCGTCGGGGCCCCGGTTTCGCCACGCCAGCAGCCGCAGAACGTCGTCGTTCTGTGCCCCAAGCCT  
ATTCAGCAAGTGCCCTTGTGCATGATTTTTTCGACGTTGGTGATGCGAGATAGGAAGAAGGAGGTGGC  
CGTGCCACCGACGACGGCCACGATTAATTTCTCCTACTCGGCGGGTACCTCGATGAAGTCAACGTTGAC  
CCGGGAGAATGAGAGCAGTAAACAACAGGCGGAGACTACTACGACTACTACAACCACTACGACGTCG  
TTTCAGTTAACGAATTATTCCGGAGTGTCATCGGCGGGGAAGCCGCCTCTTTGTCATACGACGTCGTTT  
AAGGTTAGGAAGTGTTACTCTGAGAACGGCAAGTGTTGGTGGTGGGTCCTCCGGTCGTTGTCACTGCTC  
CAAGAAGAGAAAATTGAGGTTGAAGAGGGTGGTGAGAGTGCCGGCTATAAGCTCAAAAATGGCGGAT  
ATACCCCCAGATGATTATTCTTGGAGAAAATATGGGCAAAAAGCCCATCAAAGGCTCCCCCTCATCCAAGA  
GGATACTACAAGTGCAGTACAGTTAGAGGATGCCAGCTCGAAAGCATGTAGAGAGGGCATTGGACGA  
TCCAAACATGTTAGTTGTCACATATGAAGGCGAGCACAACCATTCTCTCTCCGTCGTTGAAGCCTC CAG  
TCTGATCCTTGAGTCATCTTAA

>HmoWRKY15

ATGGCTGTAGATCTCATGTTGGGTTACAGCAACTCCTCCTCCTCTAATAACCGTTCTCTCTCCTCTAAAA  
TGGAGGAAGCCATCGCTCAAGAAACCGCCGCTGGTCTTCAAAGCGTCGAGAATTTCTGTC AACCTCCTC  
TCCAAACAGTCGCACCATCAACCTAAACCAGAGGCCATGGAAATCGATCTCAACTGCCGGGCTGTGGC  
GGACGACGCCGTTTCCAGGTTCAAGAAGGTCATCTCTCTCCTGGGCCGAGCTCGGACGGGCCACGCCC  
GCTTCCGTCGGGGCCCCGGTTTCGCCACGCCAGCAGCCGCAGAACGTCGTCGTTCTGTGCCCCAAGCCT  
ATTCAGCAAGTGCCCTTGCATGATTTTTTCGACGTTGGTGATGCGAGATAGGAAGAAGGAGGTGGC  
CGTGCCACCGACGACGGCCACGATTAATTTCTCCTACTCGGCGGGTACCTCGATGAAGTCAACGTTGAC  
CCGGGAGAATGAGAGCAGTAAACAACAGGCGGAGACTACTACGACTACTACAACCACTACGACGTCG  
TTTCAGTTAACGAATTATTCCGGAGTGTCATCGGCGGGGAAGCCGCCTCTTTGTCATACGACGTCGTTT  
AAGGTTAGGAAGTGTTACTCTGAGAACGGCAAGTGTTGGTGGTGGGTCCTCCGGTCGTTGCCACTGCTC  
CAAGAAGAGAAAATTGAGGTTGAAGAGGGTGGTGAGAGTGCCGGCTATAAGCTCAAAAATGGCGGAT  
ATACCCCCAGATGATTATTCTTGGAGAAAATATGGACAAAAGCCCATCAAAGGCTCCCCCTCATCCAAGA  
GGATACTACAAGTGCAGTACAGTTAGAGGATGCCAGCTCGAAAGCATGTAGAGAGGGCATTGGACGA

TCCAAACATGTTAGTTGTACATATGAAGGCGAGCACAACCATTCTCTCTCCGTCGTTGAAGCCTCCAG  
TCTGATCCTTGAGTCATCTTAA

>HuWRKY16

ATGGATGGGTATGAATTTGGTAAATCAGGAGGTGACTGGGATTTGCAGGCCATTGTCAAAGGGTGCAA  
CAGTCCTGTGATCAGTCAATCATGGATTCAATCTCTAAGCCAGGAAGAAGATCACAGCACATGCCATGA  
AAACAAAGCTTTGCAAGGCGCGACAAGCGTCCATGACTCCGCGAAAAGTCCAACCTCGAGTGCAAAAG  
CAGAAGGCAGTGGGTGTTTCTTGTGCAAATTCTCATGGAGTTACCAAAGAAAGAAGGAGGAAGCCCA  
AACAGAGGACCACCTTTGTTTCAGCAAGTTGCAGGGGATCGCGCCTTGTGAGATAACTGGAAGTGGAG  
AAAATATGGCCAGAAAACCATAAAGGGTTCACCCTATCCAAGGAGCTATTACAAATGTAGCAGCTCCGG  
AGATTGCTTGGCAAGAAAACAAGTGGAGCACAGCAGCAGTATCCAGGGACATTCTTGATCACCTACA  
TATATGAACATAACCATCCTTATCCAACCTCGACGACACTCTCAAGCTGGCCGTACTAAGGACAGATTGGA  
TTCATCATCCAAAGTCCACGCAACTAGTGAATCATCAACAAACAAGCGAAGTACGACCAACACAATTA  
GCTCCCTCGAATCCCCATTATTTGGAGAGAATGATCGCATTTTCGACTTTGAAATGCGAAAAAGATGAAG  
GAAACTCAGAAGATGCCGGAGGAGGAGGAGGAGATGTTGATGTTTCAAACATGATGTGGGATGATGAA  
TTTTTTGCAGGGTTAGAGCACTTGGAGGGATTA

GAAATGGATCTATTATGA

>HmoWRKY16

ATGGATGGGTATGAATTTGGTAAATCAGGAGGTGACTGGGATTTGCAGGCCATTGTGCAAGGGTGCAA  
CAGTCCTGTGATCAGTCAACCATGGATTCAATCTCTAAGCCAGGAAGAAGATCACAACACATGCCATG  
AAAACAAAGCTTTGCAAGGCGCGACAAGCATCCATGACTCCGCGAAAAGTCCTACTCGAGTGCAAAA  
GCAGAAGGCAGTGGGTGTTTCTTGTGCAAATTCTCAGCGAGTTACCAAAGAAAGGAGGAGGAAGCCC  
AAACAGAGGACCACCTTTGTTTCAGCAAGTTGCAGGGGATCGCGCCTTGTGAGATAACTGGAAGTGGGA  
GAAAATATGGCCAGAAAACCATAAAGGGTTCACCCTATCCAAGGAGCTATTACAAATGTAGCAGCTCCG  
GAGATTGCTTGGCAAGAAAACAAGTGGAGCACAGCAGCAGTATCCAGGGACATTCTTGATCACCTAC  
ATATATGAACATAACCATCCTTATCCAACCTCGACGACATTCTCAAGCTGGCCGTACTAAGGACAGATTG  
ATTCATCATCCAAAGTCCACGCAACTAGTGAATCATCAACAAACAAGCGAAGTACGACCAACACAATT  
AGCTCCCTCGAATCCCCATTATTTGGAGAGAATGATCGCATTTTCGACTTTGAAATGCGAAAAAGATGAA  
GGAAACTCAGAAGATGTCGGAGGAGGAGGAGGAGATGTTGATGTTTCAAACATGATGTGGGATGATGA  
ATTTTTTGCAGGGTTAGAGCACTTGGAGGGATTAGAAATGGATCTATTATGA

>HuWRKY17

ATGGCTCTTGAAGAAAACTAGCCAATGAAGCGGTTCAAAAAGGATTAACATATGCACATAAGTTCATC

AGCTCCATTTCTGATCAAACCCAACCCAGCATTAGCCTCGATTTCTGAAGAATCAAGCCTAATTGCCTATG  
AAGCGATCAAGGAGTTCAAAAAATTTGTTTCCCTTCTCGAGGAATCGATGATAAAGAAGCCCAACAGA  
GTCAAACAGGGTCTCTGGCTAAAGTTAGAGGGATAAACCTAAGGAGATGGTTGATCCTCTGGCTCC  
CAGATTGAACCAGTTGGTGTCTTCTCAGGTTCTGCAACCAAGGAGCTGAGTTTTGTAAAGGGGGGAA  
GTAATGTCATAAATATGTCATTTTCAAACCCGGTTTTGTCCTTGGAAGGATCAACCACCAGCAGCAAGC  
AAATGGTTATGCAGAGCTCATTTTCCGGGGTTTTGACATTCAGTGGAGATACTAGCACCAGGTGTGCTT  
CCTCTAGCAGGACCTGTCATTGCTCCAGGAAAAGGAAACGGAGAGAAAAGCAAAGAATAAAAGTCCC  
AGCCATAAGTGAGAAAATAGCAGACATACCACCTGATGATCATTGCTGGAGGAAATACGGCCAGAAAC  
CGATCAAAGGTTCTCCACACCCCAGGAGCTACTACAAATGCAGCACTTGCAAGGGGTGCCAGCAAG  
GAAACAAGTGGAAGATGTTTGGAAGATTCAAGCATGTTGGTTGTGACATATGAAGGAGAACACAATC  
ACTCTTCATTTACATTTCCATATCCAGCCATTACATTTTGA

>*HmoWRKY17*

ATGGCTCTTGAAGAAAACTAGCCAATGAAGCGGTTCAAAAAGGATTAACATATGCACATAAGTTCATC  
AGCTCCATTTCTGATCAAACCCAACCCAGCATTAGCCTCGATTTCTGAAGAATCAAGCCTAATTGCCTATG  
AAGCGATCAAGGAGTTCAAAAAATTTGTTTCCCTTCTCGAGGAATCGATGATGAAGAAGCCCAACAGA  
GTCAAACAGGGTCTCTGGCTAAAGTTAGAGGGATAAACCTAAGGAGATGGTTGATCCTCTGGCTCC  
CAGATTGAACCAGTTGGTGTCTTCTCAGGTTCTGCAACCAAGGAGTTGAGTTTTGTAAAGGGGGGAA  
GTAATGTCATAAATATGTCATTTTCTGAACCCGGTTTTGTCCTTGGAAGGATCAACCACCAGCAGCAAGC  
AAATGGTTATGCAGAGTTTCATTTTCCGGGGTTTTGACATTCAGTGGAGATACTAGCACCAGGTGTGCTT  
CCTCTAGCAGGACCTGTCATTGCTCCAGGAAAAGGAAACGGAGAGAAAAGCAAAGAATAAAAGTCCC  
AGCCATAAGTGAGAAAATAGCAGACATACCACCTGATGATCATTGCTGGAGGAAATACGGCCAGAAAC  
CGATCAAAGGTTCTCCACACCCCAGGAGCTACTACAAATGCAGCACTTGCAAGGGGTGCCAGCAAG  
GAAACAAGTGGAAGATGTTTGGAAGATTCAAGCATGTTGGTTGTGACATATGAAGGAGAACACAATC  
ACTCTTCATTTACATTTCCATATCCAGCCATTACATTTTGA

>*HuWRKY18*

ATGGACTCATCTAAGTGGATAC TCAATCCCCCTCTCGGGTTCAATCTTAACCTTAGTCTTTCTGATTCGG  
ATTCTCTTAGATGCGAATCAATAAGTCCATCAAATGATGCGATTTTATGTCAACAGGTGACGAACAAAG  
AGAGTGAGAACCTAGTGGAGAAGATGGACAGAATGAGAACAGAGAACAAGAAATTGACACAAATGTT  
GACATCAATGTGTGAGAATTACAATGTTTTGCAAAGCCAGTTGGTGAATTTGTAAAGTCAAACCTCCAAA  
AGCTGAAAATAGAGATGATTATCTTAAGAAAAGGAAGACTTGTTTTGAGGCTATCGATGGTGAAGATAT

TCAGGGGAGTTCAGAGCATAGCTGCATCAGCTACGAAGATTCTTGTAAGAGCAAGGCTGCTAAGTT  
CTAAGCCTAAGGTGTCAAAGATCTTCGTTTGAAGTGAAGGATGAAATCCGATACGAACTGGGTGTGAAGGAT  
GGATATCAATGGAGAAAATATGGGCAAAGGTCACAAGAGATAACCCAAGTCCTAGAGCCTACTTTAA  
ATGTGCCAATGCCCCCTATGTGCCCCGTGAAAAAGAAGGTGCAAAGAAGCATTGAGGACCCATCCATATT  
GGTTGCAACATATGAAGGGGAGCACAACCATGCAAAACCTAGTTCAAAAGATACAGACCAGGTAGTCT  
TAGGCTCAAGTCACTGTTCCATCACTCATCCAAACGCTAGCATGATCCATGATGAGTTGATGATGAACC  
CTAATTTTCCTAACAAGACTATGGATGACTATCAAAATCCGCCAAGCATGGACTTTGATATCAAAACACT  
ACATCGATCGTTGGTGGAGAAAATGGCTGCTTCATTAAGTATAGAGATCCTTGTTTCACATCTTCATTAGCA  
GCAGCGATATCTGGGAAGATGTTAGATGACAGTCATTCTAAGAGATGGCTTTAA

>*HmoWRKY18*

ATGGACTCATCTAAGTGGATACTCAATCCCCCTCTCGGGTTCATCTTAACCTTAGTCTTTCTGATTTCGG  
ATTCTCTTAGATGCGAATCAATAAGTCCATCAAATGATGCGATTTTATGTCAACAGGTGACGAACAAAG  
AGAGTGAGAACCTAGTGGAGAAGATGGACAGAATGAGAACAGAGAACAAAGAAATTGACACAAATGTT  
GACATCAATGTGTGAGAATTACAATGTTTTGCAAAGCCAGTTGGTGAATTTGTTAAGTCAAACCTCCAAA  
AGCTGAAAATAGAGATGATTATCTTAAGAAAAGGAAGACTTGTTTTGAGGCTATCGATGGTGAAGATAT  
TCAGGGGAGTTCAGAGCATAGCTGCATCAGCTACGAAGATTCTTGTAAGAGCAAGGCTGCTAAGTT  
CTAAGCCTAAGGTGTCAAAGATCTTCGTTTGAAGTGAAGGATGAAATCCGATACGAACTGGGTGTGAAGGAT  
GGATATCAATGGAGAAAATATGGGCAAAGGTCACAAGAGATAACCCAAGTCCTAGAGCCTACTTTAA  
ATGTGCCAATGCCCCCTATGTGCCCCGTGAAAAAGAAGGTGCAAAGAAGCATTGAGGACCCATCCATATT  
GGTTGCAACATATGAAGGGGAGCACAACCATGCAAAACCTAGTTCAAAAGATACAGACCAGGTAGTCT  
TAGGCTCAAGTCACTGTTCCATCACTCATCCAAACGCTAGCATGATCCATGATGAGTTGATGATGAACC  
CTAATTTTCCTAACAAGACTATGGATGACTATCAAAATCCGCCAAGCATGGACTTTGATATCAAAACACT  
ACATCGATCGTTGGTGGAGAAAATGGCTGCTTCATTAAGTATAGAGATCCTTGTTTCACATCTTCATTAGCA  
GCAGCGATATCTGGGAAGATGTTAGATGACAGTCATTCTAAGAGATGGCTTTAA

>*HuWRKY20*

ATGGACGGAGCTCCGGTAGCCTCCGGCAACACGCCAACATCATCCGGCGCCGGCGTTATGGACGGCTC  
TGATCTGAGGAGCAGGGGGGCCCCACAACGATGCCGGATCATCAACCATTAAACGCCAAGTACAAGCTCA  
TGTCGCCGGCCAAACTCCCGATCTCTCGTTTCGCTTGATCACTATCCCTCCTGGCCTCAGTCCGACGT  
CGTTTCTTGAATCCCCCGTCCTCCTTTCCAATTTCAAGGGAGAACCTTCGCCAACAACTGGTTTCTTTTT  
CAAGCCTCAAATAATGCACAGCTCTTCTTGTTGGGTCCACATTCCCTTCTATTATAAATAACTCTGATACCA

TGGATGGTAGTAATTCAAGCGGCTTTGAGTTCAAACCCGATTCTGGATCATTTTCTGCTGGAGGCTTTTC  
TTTTGCAAGATCTCTGCTCCCATCTTCAGATTTGAACCGACAACAAGCTATGCAAGTCCAAGCAGAGTG  
CCAGTCTCAATCATCTGATCCATCGACAACCTGTAAAAGCGAAGTAGGAGGCTCAACTGAATTGAGATC  
TACTATGTTTACTCCAGGATCTGCTATACAGCCTGAAGTTGATTCCAATGAATTAAATCAAACAGCAGAC  
TCCAATAATGAAGCCCAGGCACCACAACTGAGCAGAAAGGAGTAGGGTCTCAAGTCATAACATCAGA  
TGATGGGTACAATTGGAGGAAGTATGGACAGAACTTGTCAAGGGAAGTGAATATCCACGAAGTTATT  
ACAAATGTACGCATCCCAACTGTGAAGTCAAAAAGTTATTTGAGCGATCACCTGATGGACATATAACAG  
AGATCATCTACAAGGGTACACATGATCATCCGAAGCCTCAACCTAATCGTCGACTCCCAACTGGCTCTA  
TGATGTCCACCCTTGAAGAAAAATCTGATAGAGTTCCTCTTGCTGGTCACGAAGGCAAACCTAGCTGATC  
CTTTCAGTCAAATAGGCCATAATAGTGAGCCCAGCAGCACCCCTGAGCTACCTGCTTCTGGAGCGAATG  
ACCATATTGGAGAAGGTGGCGTTTCCCAATTGAATAGAATTGCTGACGATGCTGATGATGACGATCCTTT  
TGCCAAGAGGAGGAGGATGGAAGTTGGTGAAATGGACATCAACTCTGTGGTTAAGCCAATCCGAGAA  
CCACGTGTCGTTGTCCAAACGGTGAGTGAGGTTGATATTCTTGATGATGGATACCGCTGGCGCAAGTAT  
GGGCAGAAGGTGGTGAGAGGCAACCCAAATCCAAGGAGTTACTATAAGTGCACTCACCCCGGATGCC  
CAGTAAGGAAGCACGTGGAGAGGGCATCCCATGACCCAAAATCAGTGATAACAACCTTACGAGGGGAA  
ACACAATCATGACGTACCAACTGCCCCGAATAGTAGCCATGACACAGTGGCTCAAGCAGCTTCAAGCC  
TGGCAGCACGGGCTAGCTCACATGAAGGGACTGAAGGAGTGAGCCTTGATCTCGGAGTTGGGCTGAG  
GCCAGGCCCTGACTTTGGGTCAGGCCACCAGACGGCTATGGCGGCTGAGCACATCGCTGGCGCTGCCC  
ATTTTGGGAGTCCGAATCTTTTGTACTTCAAGCGGCTCAGATTTCAAGTTTTCCTGGTTATGTAAATGG  
TGGTATGGTGGTTTATGGTTCAACAAATAGGGAAAACCATAGTCAAGGGCATAGCATTGGAATGGGAA  
CCCGCCTGTAAATCACTCTTCTAATCCATATCAACAGAACACGGGAA

GGATACTAATGGGTCCTTAG

>*HmoWRKY20*

ATGGACGGAGCTCCGGTAGCCTCCGGCAACACGCCAACATCATCCGGCGCCGGCGTTATGGACGGCTC  
TGATCTGAGGAGCAGGGGGGCCCCACAACGATGCCGGATCATCAACCATTAACGCCAAGTACAAGCTCA  
TGTCGCCGGCCAAACTCCCGATCTCTCGTTGCCTTGATCACTATCCCTCCTGGCCTCAGTCCGACGT  
CGTTTCTTGAATCCCCCGTCCTCCTTTCCAATTTCAAGGGAGAACCTTCGCCAACAACTGGTTTCTTTT  
CAAGCCTCAAATAATGCACAGCTCTTCTTGTGGGTCCACATTCCCTTCTATTATAAATAACTCTGATACCA  
TGGATGGTAGTAATTCAAGCGGCTTTGAGTTCAAACCCGATTCTGGATCATTTTCTGCTGGAGGCTTTTC  
TTTTGCAAGATCTCTGCTCCCATCTTCAGATTTGAACCGACAACAAGCTATGCAAGTCCAAGCAGAGTG  
CCAGTCTCAATCATCTGATCCATCGACAACCTGTAAAAGCGAAGTAGGAGGCTCAACTGAATTGAGATC

TACTATGTTTACTCCAGGATCTGCTATACAGCCTGAAGTTGATTCCAATGAATTAAATCAAACAGCAGAC  
TCCAATAATGAAGCCCAGGCACCACAACTGAGCAGAAAGGAGTAGGGTCTCAAGTCATAACATCAGA  
TGATGGGTACAATTGGAGGAAGTATGGACAGAACTTGTCAAGGGAAGTGAATATCCACGAAGTTATT  
ACAAATGTACGCATCCCAACTGTGAAGTCAAAAAGTTATTTGAGCGATCACCTGATGGACATATAACAG  
AGATCATCTACAAGGGTACACATGATCATCCGAAGCCTCAACCTAATCGTCGACTCCCAACTGGCTCTA  
TGATGTCCACCCTTGAAGAAAAATCTGATAGAGTTCCTCTTGCTGGTCACGAAGGCAACTAGCTGATC  
CTTTCAGTCAAATAGGCCATAATAGTGAGCCCAGCAGCACCCTGAGCTACCTGCTTCTGGAGCGAATG  
ACCATATTGGAGAAGGTGGCGTTTCCCAATTGAATAGAATTGCTGACGATGCTGATGATGACGATCCTTT  
TGCCAAGAGGAGGAGGATGGAAGTTGGTGAAATGGACATCAACTCTGTGGTTAAGCCAATCCGAGAA  
CCACGTGTCGTTGTCCAAACGGTGAGTGAGGTTGATATTCTTGATGATGGATACCGCTGGCGCAAGTAT  
GGGCAGAAGGTGGTGAGAGGCAACCCAAATCCAAGGAGTTACTATAAGTGCACTCACCCCGGATGCC  
CAGTAAGGAAGCACGTGGAGAGGGCATCCCATGACCCAAAATCAGTGATAACAACCTTACGAGGGGAA  
ACACAATCATGACGTACCAACTGCCCGGAATAGTAGCCATGACACAGTGGCTCAAGCAGCTTCAAGCC  
TGGCAGCACGGGCTAGCTCACATGAAGGGACTGAAGGAGTGAGCCTTGATCTCGGAGTTGGGCTGAG  
GCCAGGCCCTGACTTTGGGTCAGGCCACCAGACGGCTATGGCGGCTGAGCACATCGCTGGCGCTGCCC  
ATTTTGGGAGTCCGAATCTTTTGTACTTCAAGCGGCTCAGATTTCAAGTTTTCCTGGTTATGTAAATGG  
TGGTATGGTGGTTTATGGTTCAACAAATAGGGAAAACCATAGTCAAGGGCATAGCATTGGAATGGGAA  
CCCGCCTGTAAATCACTCTTCTAATCCATATCAACAGAACACGGGAAGGATACTAATGGGTCCTTAG

>HuWRKY21

ATGGAGGGGGTTGAGGAAGCTAACAGAGGTGCCGTGGAAAGTTGTCATAGAGTTCTAAGCATCATATC  
TCAATCTCAAGACCAAGCCCAGTTTAGGAAATTAGCTGCTGAACTGAGCAAGCCTTGACTAAGTTCA  
AAAGGGTTATATCTCTCCTAGGTAACGGATTAGGCCATGGGAGGGCTAGGATAGTGAAGAGAAATAGA  
ACTAACCCTTATCCCCAAAATATTTTCTTAGAGTGGTCAAATGAGCCTAAAGCTGATCAGATTCAACCAA  
TTGAGGCTCTTCAGTACTCAAAACCAACTTGAATGAGTGCCCAATTCAAGAGAATGGCTCCACAACCT  
GGTAGAAGTTGTTTGTCTTTGGGGGGGAATCTGTCATTGGAAGTCAAGCGGAAAAACCCCTCT  
TCAACTTGCTCAGGTGGTTCCGAAATCACATTATCAGTTCCTTCAGCCGCAGCAGAATCTCCAGCTTCA  
ACAGCAACAGCTAAAGCATCAAGCTGAAATGATGTATAAGAGGAGTAATAGTGGGATTAATCTGAATTT  
CAACTACTCTAGTTGCACTCCTACGATGTCTTCGACTCGATCTTTCATCTCTTCATTGAGTATTGATGGGA  
GTGTGGCTAATTTGGATGGGAATGGGTTCAATTTGATTGGGGTCAGTCACTCATCAGACCAGAACTTGA  
GCCAACAGAGAAAGAGGTGCTCTGGTAGGGGAGAAGATGGTAGTGTGAAATGTTCAAGTAGTGGTCG

ATGCCATTGCTCCAAAAAGAGGAAGCATAGGGTGAAGAGATCAATCAAGGTTCTGCCATTAGTAACA  
AACTGGCCGATATCCCTCCGGACGAGTATTCTGGAGAAAATATGGTCAGAAGCCAATCAAGGGTTCA  
CCTCACCTAGGGGTTACTATAAGTGTAGCACCATGAGAGGTTGTCCCGCAAGGAAGCATGTCGAGAG  
GTGCTTGGAAGATCCGTCTATGCTTATTGTTACATATGAAGGTGAGCACAATCACTCCTGTGTACCATCA  
CCATCAGCAAACACATGA

>*HmoWRKY21*

ATGGAGGGGGTTGAGGAAGCTAACAGAGGTGCCGTGGAAAGTTGTCATAGAGTTCTAAGCATCATATC  
TCAATCTCAAGACCAAGCCCAGTTTAGGAAATTAGCTGCTGAACTGAGCAAGCCTTGACTAAGTTCA  
AAAGGGTTATATCTCTCCTAGGTAACGGATTAGGCCATGGGAGGGCTAGGATAGTGAAGAGAAATAGA  
ACTAACCTTATCCCCAAAATATTTTCTTAGAGTGGTCAAATGAGCCTAAAGCTGATCAGATTCAACCAA  
TTGAGGCTCTTCAGCTACTCAAACCAACTTGAATGAGTGCCCAATTCAAGAGAATGGCTCCACAAC  
GGTAGAAGTTGTTTGTCTTTGGGGGGGAATCTGTCATTGGAAGTCAAGCGGAAAAACCCCTCT  
TCAACTTGCTCAGGTGGTCCGAAATCACATTATCAGTTCCTTCAGCCGCAGCAGAATCTCCAGCTTCA  
ACAGCAACAGCTAAAGCATCAAGCTGAAATGATGTATAAGAGGAGTAATAGTGGGATTAATCTGAATTT  
CAACTACTCTAGTTGCACTCCTACGATGTCTTCGACTCGATCTTTCATCTCTTCATTGAGTATTGATGGGA  
GTGTGGCTAATTTGGATGGGAATGGGTTCAATTTGATTGGGGTCAGTCACTCATCAGACCAGAACTTGA  
GCCAACAGAGAAAGAGGTGCTCTGGTAGGGGAGAAGATGGTAGTGTGAAATGTTCAAGTAGTGGTCG  
ATGCCATTGCTCCAAAAAGAGGAAGCATAAGGTGAAGAGATCAATCAAGGTTCTGCCATTAGTAACA  
AACTGGCCGATATCCCTCCGGACGAGTATTCTGGAGAAAATATGGTCAGAAGCCAATCAAGGGTTCA  
CCTCACCTAGGGGTTACTATAAGTGTAGCACCATGAGAGGTTGTCCCGCAAGGAAGCATGTCGAGAG  
GTGCTTGGAAGATCCGTCTATGCTTATTGTTACATATGAAGGTGAGCACAATCACTCCTGTGTACCATCA  
CCATCAGCAAACACATGA

>*HuWRKY22*

ATGGAAGGCTTTGCAGATTGGGATCTTCTAGCGGTGGTCCGAAGTTGTTGCACAGCCACCGCCACCGC  
GACCACCACCTCAGCGGTGGATGTCCACCCATCTCCCCGCCTCCTCCGCCAGTGAAGGAAGAGCCCT  
GTTTCCCTCTCCCAACTCCTGCTCCTCCTACTCCACCTTCTTCTTCTTCTCCTCATCAAGTGAGCTTCTT  
TTTGC GTTTCCCACTACCTTTTTTGACCCCCAACGGCGTCGTTCTTTGGTGGGCAACAAGATTTGCAG  
GATGTTTGTAACCCAAATCCATTTGCACCACCAATTCTACCAATTTTACCCAAACTCCTCCACTTCTT  
CTTCTCTGACTTCCTCTGTTTCTTCATCGTCTTCTTCTTCTGTCATCGCTCGAAAATCTTTCGGAATCGGA  
GAACAACCGGAGCTCCGGCGCCTAATTTGCCCTACTCAAGTTGTATTTGGGGCTGCTCCTGCTTCGACT

TCTCCAGCTCAAAGAACAAAAAAGGAAGAATTTGGTGAAGAAAGTGTTCCATGTACCAGCTGAAG  
GTCTGTCAAATGACATGTGGGCATGGAGAAAATATGGTCAGAAACCCATCAAAGGTTCTCCATATCCCA  
GGGGTTACTACAGATGCAGCAGTTCGAAGGGGTGTTTAGCCCGAAAACAAGTGGAGCGAAACAGATC  
CGACCCGACAATGTTTCATCGTCACTTACACCGCGGAGCACAACCACCCTATGCCTACCCATCGGAACTC  
CCTAGCCGGAAGCACCCGACAGAAGTCCGCCGCTTCCGCCGATGTTCCGTCGCAAGATCAGCCGACCT  
GCTCTTCCCCCTCGGCCGCCAGTCTCTCTCCTCCGATGGAGAAATCGGAGTCAAAAACAGAGGGCGAT  
GATCTGATCAAGGAAGACGAAGACAACGACATGGGTCTTTCAGATCTGATTCTCAATGACGATTTCTAC  
GTGGGTTTTGAAAAAATCGACGCCGATGAGTGCTTTTCCGACCACTTTTCTCCGCCGATGGAGCCTCCT  
TGGCTAGCAAACAGCAGCAGCCCCGCCG**CCGCAGCCGGTGGCAGCTGA**

>HuWRKY23

**ATGGAGAAGGAAGCAGTGTG**AAAATGGAGAGTTTGCTGGGAGGAGTAGGAGGAGGAGGAGGAGGA  
GCTTCATTTAGTGGTGTAGTACTACTGATTACCACTGTAATTTGGCTAAAAGTAGTCTTTCATCATCCAC  
AACAAACATCATCATCAACATCACCCAGTTTGGGGTTTATGGAGTCAATGAGTATGCAGGAAAT  
CATGATTCATAATAACATTATCGGCCCTTCTCTGCTTGATATGGTCATCAATGGCTATGGTGTGGGTGGAA  
ATCATCAGGTCTTGCTGATTCTCTAGACCCTCCTGCACCTGATCCCACTCTTAATTCAAATGTCAACCC  
AGATTCATTATCTGATCAAGTTGTTAATAATCATCAGCCTACAACACCAAACCTCTTCTTCAGTGTCTCT  
GCTTCGAATGACGCGGCCAATGATGAACAACAACAGCAGCAGCAGAACAAGCCTGGTGATGGTGGGG  
AGGAGGAGGAAGAAGAAGAAGAGGAACAGCAAAAAGACACCAAAGATTTGACAAAAGCCAAAAAG  
ACAAATCAGAAGCGGCAGAGAGAACCCAGATTTGCGTTCATGACAAAGAGCGAGGTTGATCATCTAG  
AAGATGGGTATCGATGGAGAAAGTATGGTCAAAAAGCTGTAAAAAACAGCCCTTCCCAAGGAGTTAC  
TACCGTTGCACCAGTGCATCATGCAATGTGAAGAAGAGAGTGGAGAGATCCTTCACTGACCCCTCCAT  
AGTTGTCACTACCTATGAAGGCCAACACATCCACCCCTGTACCGTCTTCCACGTGGCATCATGCCAGG  
TCCCGGGTTCGGATTCAGTTTCGGCCGCGGCTCTGGTGGCGGTGGCGGTGCAACCACCACCACCAT  
CTCCCTATGCCTTGCAGCAGCAAATGCAACTTATGATGGCTAGTAATAATAGTCACATTCTACCTTCTAA  
CATCCAAACAAGTTATGGTCGTCATGTTGCCTCTTTTGGCAATGTTTTAAGCACACCACATAATGCATTG  
TTGTTTGCTCAAGAAAAGAGCTTCTGTGGTGCACCTGCTAATGCTGGTTTGATTCCTGATAATGGCCTTC  
TTCAAGATATGATTCTTCCTAATC**CCATTATGAAGACTGAAGAGTAG**

>HmoWRKY23

ATGGAGAAGGAAGCAGTGTGAAAATGGAGAGTTTGCTGGGAGGAGTAGGAGGAGGAGGAGGAGGA

GCTTCATTTAGTGGTGTTAGTACTACTGATTACCACTGTAATTTGGCTAAAAGTAGTCTTTCATCATCCAC  
AACAAACAACATCATCATCATCAACATCACCCAGTTTGGGGTTTATGGAGTCAATGAGTATGCAGGAAAT  
CATGATTCATAATAACATTATCGGCCCTTCTCTGCTTGATATGGTCATCAATGGCTATGGTGTGGGTGGAA  
ATCATCAGGTCTTGCCTGATTCTCTAGACCCTCCTGCACCTGATCCCACTCTTAATTCAAATGTCAACCC  
AGATTCATTATCTGATCAAGTTGTTAATAATCATCAGCCTACAACACCAAACCTCTTCTTCAGTGTCTCT  
GCTTCGAATGACGCGGCCAATGATGAACAACAACAGCAGCAGCAGAACAAGCCTGGTGATGGTGGGG  
AGGAGGAGGAAGAAGAAGAAGAGGAACAGCAAAAAGACACCAAAGATTTGACAAAAGCCAAAAAG  
ACAAATCAGAAGCGGCAGAGAGAACCCAGATTTGCGTTTCATGACAAAGAGCGAGGTTGATCATCTAG  
AAGATGGGTATCGATGGAGAAAGTATGGTCAAAAAGCTGTAAAAAACAGCCCTTTCCCAAGGAGTTAC  
TACCGTTGCACCAGTGCATCATGCAATGTGAAGAAGAGAGTGGAGAGATCCTTCACTGACCCCTCCAT  
AGTTGTCACTACCTATGAAGGCCAACACATCCACCCCTGTACCGTCCTTCCACGTGGCATCATGCCAGG  
TCCCGGGTTCGGATTCAAGTTTCGGCCGCGGCTCTGGTGGCGGTGGCGGTGCAACCACCACCACCACAT  
CTCCCTATGCCTTGCAGCAGCAAATGCAACTTATGATGGCTAGTAATAATAGTCACATTCTACCTTCTAA  
CATCCAAACAAGTTATGGTCGTCATGTTGCCTCTTTTGGCAATGTTTTAAGCACACCACATAATGCATTG  
TTGTTTGCTCAAGAAAAGAGCTTCTGTGGTGCACCTGCTAATGCTGGTTTGATTCTGATAATGGCCTTC  
TTCAAGATATGATTCTTCCTAATCCCATTATGAAGACTGAAGAGTAG

>HuWRKY24

ATGACATATGACCCTCATGAAATTTTTCTTGATAACCATGATAATCAAGATGATCATGATAATGATGGCAG  
CGTTATGGCACAAGTGTTGGAAATTCCCACGGTTCAGTCTCCATTGATCCTCGATGATATTTATCATACTA  
ATTATGACATTAACAATGATCATCATGTTAATTATCATCCTGATCAAGACGATGATGATCATCATCATGATC  
ATGCTAATAATGATGAGATTATCATCATAAATGATGATAATAGTAAGTTGACGAAGAAAGTATCATCATCA  
TCGAAGAAGATAAAGAAGCATCGATATGCATTTCAAACAAGGAGTCAAGTTGATATTCTTGATGACGGC  
TATAGATGGCGCAAGTATGGCCAAAAGGCGGTCAAAAATAACACCTTCCCAAGAGGGTATTATAGATGC  
ACCTATCAAGGATGCAAGGTGAAAAACAAGTTCAACGTCTATCGGATGACGAAGGGATTGTGGTCAC  
CACTTATGAAGGGGTTCACTCTCATCCAATTCAGAAGTCTACAGATAACTTTGAGCATATCTTGAGCGA  
AATGCAAATTCACCCTTCTTGTTGA

>HmoWRKY24

ATGACATATGACCCTCATGAATTTTTCTTGATAACCATGATAATCAAGATGATCATGATAATGATGGCAG  
CGTTATGGCACAAGTGTTGGAAATTCCCACGGTTCAGTCTCCATTGATCCTCGATGATATTTATCATACTA  
ATTATGACATTAACAATGATCATCATGTTAATTATCATCCTGATCAAGACGATGATGATCATCATCATGATC

ATGCTAATAATGATGAGATTATCATCATAAATGATGATAATAGTAAGTTGACGAAGAAAGTATCATCATCA  
TCGAAGAAGATAAAGAAGCATCGATATGCATTTCAAACAAGGAGTCAAGTTGATATTCTTGATGACGGC  
TATAGATGGCGCAAGTATGGCCAAAAGGCGGTCAAAAATAACACCTTCCCAAGAGGGTATTATAGATGC  
ACCTATCAAGGATGCAAGGTGAAAAACAAGTTCAACGTCTATCGGATGACGAAGGGATTGTGGTCAC  
CACTTATGAAGGGGTTCACTCTCATCCAATTCAGAAGTCTACAGATAACTTTGAGCATATCTTGAGCGA  
AATGCAAATTCACCCTTCTTGTTGA

>HuWRKY25

ATGGGGGACAGTGAAGATGCATTGGATGAGTGGAGGGATCTTGTTGGTGAGTCCTAAGGGACTATTCTC  
AGTCTTTTCACCTGAGCGCTGTGTTACAAAATCAATTGCTGATGTTTTAGTGATCGGAAGGGGATTG  
GGGGGGTGATGATGACAAAGAAATGGAGAATTCAGTGTTTGATTGGGGAAGAAGTTGGAGGATTGTG  
GGCAGGGATGGGATTCTTCGATTGTCGAGGATGATTGGATGTGCCCATGGCAGGAGGGAGCATAGTG  
GATACGAGGGCTGCTAAGTTGGGGTTCAATGCTCCTAACGCAAGTTCCCCTCCTTTTAGCTCTAGCAGC  
CCGTTGCCCTCCCCAGGTTCTCGATCACCTATCTTATCGCACCTGCTAGTATTAGCCCTACTGGACTGC  
TTGACTCTCCACCTTTGCTGCCAAATTCACAGCCTTCTCCAACCACAGGAACTTTGAATCACCTCCGG  
AGGGTGGAACAATCAGATGGAGATTCCAACATCTTCTGCAGGCACGGACAAGCACAATGATGGTGGC  
ACTACAACCATGATTAAGGCCAATGATGCCATTCCTATCACATGTTTCTGTGCCGTAGAAAATGAGGGGT  
CCCCTGGTGGTTTGGCTCAGAGTTTGGTTGCTCGTGTTTCATGATCAAAGTATTAACACAATGCCGCTAC  
CAGTGAACCTTCGAAATTCCAATGCAGTTTCCTAATGAAGTTGCTATGAAAAGTCATGAAATTGGCTCAC  
CAAATGATGAACACTTGTGGATGACATCACTGTAGACTCCAACCCCACTCTGCAACCATGCCATT  
CGACGACTTTGGTATGTGATCAATTGCAGGAAAAGGGCGAACCGTCTCTGGAAGAGGATGCTGATACT  
TATAATGCCCTGGATTCAAAACACAAAGGAACATATGCTCCAACAGGGACAGTGAGAACCACAGAAGA  
TGGGTACAATTGGAGAAAATATGGACAGAAACAAGTCAAGGGTAGTGAATATCCACGCAGTTACTATA  
AATGCACCCACCCAACCTGTCAAGTGAAGAAGAAGGTAGAACGTTCTCATGATGGCCAAATTACAGAG  
ATTATATACAAGGGTGGCCATAACCATCCAATGCCCCAACCTGTAGGAAATCAGCATTTAGTTCATCAT  
TATCATTTTCGTGAGACATCAGATATATGTGATGGTAGTAGCTCTTGCGTCAAACTGAGAGTGAATCAAC  
CTGGAGAAACATGCAGCCAGGGAGTAAAGGTGGCATGCCTGGGTCTGACTGGAGGACTGATGGCTTG  
GACAGGGCATCCTCTACCTCTGTTGTGACTGAAGTTTCTGATATCCTGTCCACCAATCAAGAAAAACCC  
TTATGCATGCTTGAATCAGCAGGAAGTCCAGAGTTCTCATCTACAATTGCTATTAATGAGGATGATGAAG  
AAGATACTACCACCCAAGGGGGTTGTTTACTTGCAGATGATGATGACAATAAATCAGACTCAAAAAGA  
AGGAAAAAGGAGTCTTGTTTTTATGAAACAACCTTAGGTTCCAGGGCTGTTCGCGAACCAAGAGTTGT

TATCCAAATAGAGAGTGATATTGATATACTAGATGATGGGTATCGCTGGCGCAAGTACGGGCAGAAGGT  
TGTGAAGGGGAATCCAAATCCTAGGAGCTACTACAAATGCACCCGTCCTGGATGCCCTGTCAGGAAGC  
ATGTGGAAAGAGCCTCACACGACTTGAAATTTGTGATAACAACGTATGAAGGAAAACACAATCATGAA  
GTCCCTGCTGCTAGAAATAGCTGTCATGCCAATTCAAGCAGTGGAGGCTTGCCCCCTCCCACATCCAGT  
ACACAGCCTACCCTGAACTTACCGCGAAACCCTCATCTTCCAAAGCCGGAGTCTCATGTACAAGATCTC  
CCCCCTCATTTTGGCAGAAAATTGGAGTGCAATAGTGACTTCTTAGGAGCGAACTTTCTAGGGAATTTT  
GGAGGCGGAGCTTCCTCATTTTATCAAATGAAGTTTCCAGCCTTACCGAATGCTGTACCGTATGGTCCAT  
TTAGTTTGAGTAATCACCATCCAACCTTTCCCCGGCAATGTGGTGCCAGGCTTCACAGATCTTCCCTCCC  
ATTGCCACTCGGATTCCCCCATTCCTCAAATTTAGCCATTGCCAACTATACCAATCCTGGAAGACCACTT  
GCTTCAGTCCAGCCCTTCATGGCAGGCCATCACCATGAGGAACCTAACTCCAAGATCCTTAGACCTAAG  
CAGGAACAGGGAGATGACTCATTTTGTGATACAGGAATGCATCACATCGACCATAACCATGTCTTCATCAT  
CATCTATATACAGCCAAATTGTGTGA

>*HmoWRKY25*

ATGGGGGACAGTGAAGATGCATTGGATGAGTGGAGGGATCTTGTGGTGAGTCCTAAGGGACTATTCTC  
AGTCTTTTCACCTGAGCGCTGTGTTACAAAATCAATTGCTGATGTTTTAGTGATCGGAAGGGGATTG  
GGGGGGTGATGATGACAAAGAAATGGAGAATTCAGTGTTTGATTGGGGAAGAAGTTGGAGGATTGTG  
GGCAGGGATGGGATTCTTCGATTGTCGAGGATGATTTGGATGTGCCCATGGCAGGAGGGAGCATAGTG  
GATACGAGGGCTGCTAAGTTGGGGTTCAATGCTCCTAACGCAAGTTCCCCTCCTTTTAGCTCTAGCAGC  
CCGTTGCCCTCCCCAGGTTCTCGATCACCTATCTTATCGCACCTGCTAGTATTAGCCCTACTGGACTGC  
TTGACTCTCCACCTTTGCTGCCAAATTCACAGCCTTCTCCAACCACAGGAACTTTGAATCACCTCCGG  
AGGGTGGAACAATCAGATGGAGATTCCAACATCTTCTGCAGGCACGGACAAGCACAATGATGGTGGC  
ACTACAACCATGATTAAGGCCAATGATGCCATTCCTATCACATGTTTCTGTGCCGTAGAAAATGAGGGGT  
CCCCTGGTGGTTTGGCTCAGAGTTTGGTTGCTCGTGTTTCATGATCAAAGTATTAACACAATGCCGCTAC  
CAGTGAACCTTCGAAATTCCAATGCAGTTTCCTAATGAAGTTGCTATGAAAAGTCATGAAATTGGCTCAC  
CAAATGATGAACACTTGTCGGATGACATCACTGTAGACTCCAACCCCACTCTGCAACCATGCCATT  
CGACGACTTTGGTATGTGATCAATTGCAGGAAAAGGGCGAACCCTCTCTGGAAGAGGATGCTGATACT  
TATAATGCCCTGGATTCAAAACACAAAGGAACATATGCTCCAACAGGGACAGTGAGAACCACAGAAGA  
TGGGTACAATTGGAGAAAATATGGACAGAAACAAGTCAAGGGTAGTGAATATCCACGCAGTTACTATA  
AATGCACCCACCCAACCTGTCAAGTGAAGAAGAAGGTAGAACGTTCTCATGATGGCCAAATTACAGAG  
ATTATATACAAGGGTGGCCATAACCATCCAATGCCCCAACCTGTAGGAAATCAGCATTTAGTTCATCAT

TATCATTTTCGTGAGACATCAGATATATGTGATGGTAGTAGCTCTTGCGTCAAACTGAGAGTGAATCAAC  
CTGGAGAAACATGCAGCCAGGGAGTAAAGGTGGCATGCCTGGGTCTGACTGGAGGACTGATGGCTTG  
GACAGGGCATCCTCTACCTCTGTTGTGACTGAAGTTTCTGATATCCTGTCCACCAATCAAGAAAAACCC  
TTATGCATGCTTGAATCAGCAGGAAGTCCAGAGTTCTCATCTACAATTGCTATTAATGAGGATGATGAAG  
AAGATACTACCACCCAAGGGGGTTGTTTACTTGCAGATGATGATGACAATAAATCAGACTCAAAAAGA  
AGGAAAAAGGAGTCTTGTTTTTATGAAACAACCTTAGGGTCCAGGGCTGTTCGCGAACCAAGAGTTGT  
TATCCAAATAGAGAGTGATATTGATATACTAGATGATGGGTATCGCTGGCGCAAGTACGGGCAGAAGGT  
TGTGAAGGGGAATCCAAATCCTAGGAGCTACTACAAATGCACCCGTCTGGATGCCCTGTCAGGAAGC  
ATGTGGAAAGAGCCTCACACGACTTGAAATTTGTGATAACAACGTATGAAGGAAAACACAATCATGAA  
GTCCCTGCTGCTAGAAATAGCTGTCATGCCAATTCAAGCAGTGAGGCTTGCCCCCTCCCACATCCAGT  
ACACAGCCTACCCTGAACTTACCGCGAAACCTCATCTTCCAAAGCCGGAGTCTCATGTACAAGATCTC  
CCCCCTCATTTTGGCAGAAAATTGGAGTGCAATAGTGACTTCTTAGGAGCGAACTTTCTAGGGAATTTT  
GGAGGCGGAGCTTCCTCATTTTATCAAATGAAGTTTCCAGCCTTACCGAATGCTGTACCGTATGGTCCAT  
TTAGTTTGAGTAATCACCATCCAACCTTCCCCGGCAATGTGGTGCCAGGCTTCACAGATCTTCCCTCCC  
ATTGCCACTCGGATTCCCCCATTCCTCAAATTTAGCCATTGCCAACTATACCAATCCTGGAAGACCACTT  
GCTTCAGTCCAGCCCTTCATGGCAGGCCATCACCATGAGGAACCTAACTCCAAGATCCTTAGACCTAAG  
CAGGAACAGGGAGATGACTCATTTTGTGATACAGGAATGCATCACATCGACCATAACCATGTCTTCATCAT  
CATCTATATACAGCCAAATTGTGTGA

>HuWRKY26

ATGGAAGAACTGAAGAAGCAAAATGACATGAATAATAACAAAGAGCAACCCGGTTCCCACTCCGGGAT  
AAACCGGGACCAAGAAACAGAATCCAGTGCACAAAAGAATTACAACAGCTCTCAGCCTCAGCAACAA  
CCACCACAACCAGTAGTGCATATGAACAGAGCACAGAAGCGATCAGAGGACGGCTACTGCTGGAGGA  
AGTACGGCCAGAAGCAAGTGAAGGGGAGTGAGAATCCCCGGAGCTACTACAAGTGCTCGTACCCCTGG  
TTGCCCAACAAAGAAGAAGGTTCGAGCGGTCTCCTGAAGGGTTCATCACTGAGATTGTCTACAAGGGTA  
GTCACAACCATCCTAAGCCTCAACCTGGGAGAAGATCTTCAGGGCAGAATGGCAACAATGGTGGGTTT  
GATGGCTCCGAGGTGTTCAACTCTTCGGGTTTTCAAGGGCAAAGTGAGTACTCATCTTTCACTCCTGAG  
ACATCCTCGGTTTTATTGGAAGATGATGATGAGCTTGATCAGACTTCTGCAATGAGTAAGTCGTGCAAG  
AATGATGACAATGAACCTGAAGCTAAAAGATGGAGGGGTGAGAATGAGGGTGAGGTCATGTCAGGGTA  
TGAGAGCAGAACAGTGAGAGAGCCAAGAGTGATAGTTCAAACGACAAGCGAGATCGATATTCTTGATG  
ATGGGTATAGATGGAGAAAATATGGGCAGAAAGTGGTAAAAGGCAACCCGAACCTAGGAGCTACTAT

AAATGCACAAGTGCGGGTTGCCCAGTGAGGAAGCACATAGAGAGGGCTTCCCATGACTTGAGGGCCG  
TCATCACAACCTACGAAGGGAAGCACAACCACGATGTCCCAGCAGTGCGTGGTAGCAGCAGCTACAAT  
AACGCCCCCTAACCTGATTAGGCCATCGGCCACTACTGGTCCACCAAATCAACTAACTGCCCCAAAGCCC  
CTCGATAACAGTGGTGCAAGTACCTCCAGAGTGGATACTCAGTCTCCCTTCAGCTTGCAGATGTTGCAG  
AGCCCTGGGAGCTTCGATTTCTCCGGGTTTGGAATCCATTGGGAACCAAGGAGGAGCCTGTAGACAA  
TACATTCTAGAGTCACTTCTTCGTAA

>*HmoWRKY26*

ATGGAAGAACTGAAGAAGCAAAATGACATGAATAATAACAAAGAGCAACCCGGTCCCCTCCGGGAT  
AAACCGGGACCAAGAAACAGAATCCAGTGCACAAAAGAATTACAACAGCTCTCAGCCTCAGCAACAA  
CCACCACAACCAGTAGTGCATATGAACAGAGCACAGAAGCGATCAGAGGACGGCTACTGCTGGAGGA  
AGTACGGCCAGAAGCAAGTGAAGGGGAGTGAGAATCCCCGGAGCTACTACAAGTGCTCGTACCCTGG  
TTGCCCAACAAAGAAGAAGGTCGAGCGGTCTCCTGAAGGGTTCATCACTGAGATTGTCTACAAGGGTA  
GTCACAACCATCCTAAGCCTCAACCTGGGAGAAGATCTTCAGGGCAGAATGGCAACAATGGTGGGTTT  
GATGGCTCCGAGGTGTTCAACTCTTCGGGTTTTCAAGGGCAAAGTGAGTACTCATCTTCACTCCTGAG  
ACATCCTCGGTTTCATTGGAAGATGATGATGAGCTTGATCAGACTTCTGCAATGAGTAAGTCGTGCAAG  
AATGATGACAATGAACCTGAAGCTAAAAGATGGAGGGGTGAGAATGAGGGTGAGGTCATGTCAGGGTA  
TGAGAGCAGAACAGTGAGAGAGCCAAGAGTGATAGTTCAAACGACAAGCGAGATCGATATTCTTGATG  
ATGGGTATAGATGGAGAAAATATGGGCAGAAAGTGGTAAAAGGCAACCCGAACCCTAGGAGCTACTAT  
AAATGCACAAGTGCGGGTTGCCCAGTGAGGAAGCACATAGAGAGGGCTTCCCATGACTTGAGGGCCG  
TCATCACAACCTACGAAGGGAAGCACAACCACGATGTCCCAGCAGTGCGTGGTAGCAGCAGCTACAAT  
AACGCCCCCTAACCTGATTAGGCCATCGGCCACTACTGGTCCACCAAATCAACTAACTGCCCCAAAGCCC  
CTCGATAACAGTGGTGCAAGTACCTCCAGAGTGGATACTCAGTCTCCCTTCAGCTTGCAGATGTTGCAG  
AGCCCTGGGAGCTTCGATTTCTCCGGGTTTGGAATCCATTGGGAACCAAGGAGGAGCCTGTAGACAA  
TACATTCTAGAGTCACTTCTTCGTAA

>*HuWRKY27*

ATGAACGGCTCAGCTCTTAGCCCTCCTCGTTCGGTTCGTTCTTTCCTTACAACAACACTGATTACTCAT  
TTGACCATCATGACCTCGTAGATTTCTACAAGCCGTTCTTGGTCCAGCCGTCACCCCTTGGTGGCACTG  
GTGCCGACGTTCTTGACCCTCAGGTTATTGGTTCGTTACCAAAAAGCTGACACTGGGTTCGGACCTGATT  
CTGGTGGGTTCCTAACGTTAGAACCCCAACCAGAATCCACACCAGCAGCATCAACTAATACCGGCACCA  
GTAGTTGGTGGTGGTGGTACTTTTCAGCAGCATGATGATCAACAGCTTCTTCTCCGGCAGCGAAGTCTT

CAGAATCGAAAGCTGCAGATACCAGGGGCTTGCCCTGTTGGCATCCATAAGAAAAAGAAGTTTGAGGA  
GAGGAGAGTGTGCAAGATGAGACTAGAAGAGTTATCTGAGGACAAATGGGCATGGCGGAAATACGGG  
CAAAAACCCATCAAGGGCTCTCCATATCCAAGGAACTACTACAGGTGCAGCACCTCAAAAGGATGCAC  
AGCAAGGAAGCAAGTGGAGCGGAGCCCCGTTGAACCGAATACCTACCTGGTCACCTACACAGGTCAC  
CACCACCATGCCCCGGCCACCCCTCCGGACCCCAGCCCGGGTCACCCGCCCATCGGACTCCACCAGCTC  
GCCTGAGGAAGAATCCAAATCTCAGACCAGTACTTCTGCATCCCCTACCCGACCCTGGCTCCTTATCA  
AAACGGGTTCGGGTTCCGGTTCCGGGGAACCCGTGCTGGGGAAGAATGAGAATGAGAATGAGGTGGAG  
GAAGGGGATGATGATGAGGAGATTGAGCTGATTCCAACTCGATGGCGGACCCGGAACCTGCTGATGGG  
TATGGAGCGCCTGATGAACAATGATCAAAAGACATCATCAGGAGAGAGAAAACTGATGAGACTGTTG  
GAAATGGGTATGGGTATGAGTACGGGTACGGATATGGATATGACATGATGATGAGGGAGATCGGGGCAT  
CCGACCAGAATGTGAATTCGGGGTGGTGGTGAGAGGAAATGGGTTGTGTCTTGGGATCCAACAAAAG  
GAATTGGATTCTTCTTCATCTGGTTCTGCTGCACCAACAACGCTGGCGGCGGCGCATGAGTCGCCGAAT  
GGTCGGGGCCGCAACATTTGGGATAACGGGATCATTAACCTCAATCCTTCCTATTTTAA

>*HmoWRKY27*

ATGAACGGCTCAGCTCTTGAGCCCTCCTCGTTTCGGTTCGTTCTTTCCTTACAACAACACTGATTACTCAT  
TTGACCATCATGGCCTCGTAGATTTCTACAAGCCGTTCTTGGTCCAGCCGTCACCCCTTGGTGGTACTG  
GTGCCAACGTTCTTGACCCTCAGGTTATTGGTTCGTTACCAAAAGCTGACACTGGGTTCGGACCTGATT  
CTGGTGGGTTCTTAACGTTAGAACCCCAACCAGAATCCACACCAGCAGCATCAACTAATACCGGCACCA  
GTAGTTGGTGCTACTTTTCAGCAGCATGATGATCAACAGCTTCTTCTCCGGCAGCGAAGTCTTCAGAAT  
CGAAAGCTGCAGATACCAGGGGCTTGCCCTGTTGGCATCCATAAGAAAAAGAAGTTTGAGGAGAGGA  
GAGTGTGCAAGATGAGACTAGAAGAGTTATCTGAGGACAAATGGGCATGGCGGAAATACGGGCAAAA  
ACCCATCAAGGGCTCTCCATATCCAAGGAACTACTACAGGTGCAGCACCTCAAAAGGATGCACGGCAA  
GGAAGCAAGTGGAGCGGAGCCCCGTTGAACCGAATACCTACCTGGTCACCTACACAGGTCACCACCA  
CCATGCCCCGGCCACCCCTCCGGACCCCAGCCCGGGTCACCCGCCCATCGGACTCCACCAGCTCGCCTG  
AGGAAGAATCCAAATCTCAGACCAGTACTTCTGCATCGCCTACCCGACCCTGGCTCCTTATCAAAACG  
GGTCAAGTTCCGGTTCCGGTTCCGGGTCAGGGGAACCCGTGCTGGGGAAGAATGAGAATGAGAATGA  
GGAGGAGGAAGGGGATGATGATGAGGAGATTGAGCTGATTCCGAACCTCGATGGCGGACCCGGAACCTG  
CTGATGGGTATGGAGCGCCTGATGAATAATGATCAAAAGACATCATCAGGAGAAAGAAAACTGATGA  
GACTGTTGGAATGGGTATGGGTATGGGTATGAGTACGGGTACGGATATGGATATGACATGATGATGAG  
GGAGATCGGGGCACCCGACCAGAATGTGAATTCGGGGTGGTGGTGAGAGGAAATGGGTTGTGTCTTG

GGATCCAACAAAAGGAATTGGATTCTTCTTCATCTGGTTCTGCTGCACCAACAACGCTGGCGGCGGCG  
CATGAGTCGCCGGATGGTCGGGGCCGCAACATTTGGGATAACGGGATCATTAACCTCAATCCTTCCTA  
TTTTAA

>*HuWRKY28*

ATGGATGCACAAGAATTC TTATTATCATCATCATCATCAGATCATGCCCTAATGGCACCATATAATGCTGT  
TGTTGAAGATCATGATCATCATCAAATCATGACAACCTATGATGATCCCCTCTCATAATCATGATCATGGTA  
ATGATGATCATGAGTTTGTGATCCCTACAACTCATCATCATCTTCAATATCGGCGCCCAACAACAACAA  
CAACAACATGTTGTTCTCCCCATTACTGCCAATGCAAACTCCTCAAACACCCTATACCTTGGACAATATT  
GACTGGGTAGTCTGCTCTCTCCTCCTACTCCTGCTGAGGTGGCGCCTTTCAGGCTGATCTCGCTACCC  
ATGGTATCATCCTCTTCACCAGTTCCTACAATCAACAGCAGCAGCAACAACAACAACGACAACGACAA  
CAACAAGAACAACAACAATGGCGGCGGCGGTGGTGGTGGTGGTAGTGGTCATGATCATCAAATGAGG  
GGAGACAGATCAATGGCTGAGATTAATGGAGGTGGAAGTAGTAATAATAGTAAAGGAAATAGAGGAGG  
GCTAAGTAGTTCTTCAAGTTATAATTCTAGTAATTATAATAATTCAACAATGAAGAAAAAGGGGGTGACT  
CCGAGGGTGGCCTTCTATACAAAGAGTAATGAGGATGTTCTTGATGATGGTTATAAGTGGCGGAAATAT  
GGCCAGAAATCTGTAAAAATACCGTCCATCCCAGATTCAACGACACTCAA GAGATAAAAGCATTGTG  
A

>*HmoWRKY28*

ATGGATGCACAAGAATTCTTATTATCATCATCATCATCAGATCATGCCCTAATGGCACCATATAATGCTGT  
TGTTGAAGATCATGATCATCATCAAATCATGACAACCTATGATGATCCCCTCTCATAATCATGATCATGGTA  
ATGATGATGATCATGAGTTTATGATCCCTACAACTCATCATCATCTTCAATATCGGCGCCCAACAACA  
CAACAACAACATGTTGTTCTCCCCATTACTGCCAATGCAAAATCCTCAAACACCCTATACCTTGGACAAT  
ATTGACTGGGTAGTCTGCTCTCTCCTCCTACTCCTGCTGAGGTGGCGCCTTTCAGCTGATCTCGCTAC  
CCATGGTATCAGCCTCTTCACCAGTTCCTACAATCAACAGCAGCAGCAACAACAACAACGACAACAAC  
AAGAACAACAACAATGGTGGTGGTGGTGGTGGTGGTGGTAGTCATGATCATCAAATGAGGGGAGACA  
GATCAATGGCTGAGATTAATGGAGGTGGAAGTAGCAATAATAGTAAAGGAAATAGAGGAGGGCTAAGT  
AGTTCTTCAAGTTATAATTCTAGTAATTATAATAATTCAACAATGAAGAAAAAGGGAGTGACTCCGAGG  
GTTGCCTTCTATACAAAGAGTAATGAGGATGTTCTTGATGATGGTTATAAGTGGCGGAAATATGGCCAGA  
AATCTGTAAAAATACCGTCCATCCCAGGAGCTATTATCGTTGCACATATCACACATGCAATGTGAAGAA  
ACAGATTCAACGACACTCAAGAGATAAAAGCATTGTGAAAGGGCAATTCCAGCACACTGGCGGCCGTT  
ACTAG

>HuWRKY29

ATGGAAGCTCCTCCAGATTGGGATCTACTCGCTGTGGTCCGAAGCTGCAGAACCTCCACCGCCGCCGT  
CACATCAGCCGCTTTCAATGCGGCGGAGCTTCGACTTCCGCCGCCGGCACCGCCGCAGCTACCCTGCA  
GCTTCTCTCCTTCGACGACCACCTCTGCTTCTTCTTCATCAACTGGAGTTGTGTTCCGATTTCCGAACCC  
TTTTGAGGCCGCGGCGACGTCGTTTCAGGACTTGCAAGGATATCTGCAAACCCTTGATTGCAACCACCAC  
AACCACCACCACCTAGCAGCAATTGCACCGCCGATGCCGCTGCCGCCGCCGTGACCGGCACTTTCCAGG  
CGTCTTCTCTCTTATCCCCGTGTTTCTTCTTCGTCTTCTTCTTTGATTGCCGCCGGCAGACCCTTCACAATC  
GCCGAACAGCCGCGGCTAGGGCGGCCAGTAAGCCGTCTCAGGTCATCTTTGGAGCTCCTTCTGTTAC  
TGCTGGTACTTCTCAGGCTCAAAGGTCAAAGAAAAGGAAGAACTTGATGAAGAAGGTGTGCCATGTT  
CCAGCTGAAGGGCTTTCTCTGATATGTGGGCTTGGAGAAAATATGGTCAAAAACCCATCAAGGGCTCT  
CCATATCCAAGGGGATACTACAGATGTAGCAGCTCAAAAGGCTGTTTGGCCCGAAAACAAGTGGAGCG  
GAACAGATCCGACCCGAAAATGTTCATAGTCACTTATACCGCCGAGCACAACCACCCTATGCCCACTCA  
CCGGAACCTCCCTCGCCGGAAGCACGCGCCAGAAGCCCCTCTCCACCACCACCAACGACGCTTCAGCC  
GCCGCAACTCCGCCGGAGCAGCCCACCTGCTCATCCCCCTCCGCTGCCAGTCTCTCTCCTCTGACGGA  
GAAATCGGAGTCGAAGAATGAAGCCGACGACGTCGTAAAGGAGGAGAACGAAGAAGATAACGAGAT  
GGGCATCTCTGATTTGATGTTAAACGACGATTTCTACGTGGGTTTTGAGCAGATCGATGGTGATTATGGC  
GGGGATTGTTTTTCCGACCATTCTCGCCGCCGATGGAGTTCCCCTGGCTTTCTAGTAATAGCGGCACC  
GCCACC GCGGCCGGCGGGAGTTGA

>HuWRKY30

ATGGAACAAGCCTTGTTGATTACC AAGGAGCTAACCGAGGGCATGGAGAAGGCTATACAGCTAAAAGC  
TCATATGGGTCAGCAAGTTTCAGGTAAGATTGAGGGAATGCTGATAGAAGGGATACTATCTTCCTTTGA  
GAATGCCCTCTTGATTCTGAAATGGGGTGGGTCAATGGAACAGTCTCACCAACATGTGGTGCCATCGAC  
CAGTATGCCCCGGATCACCACAGTCGGTCATTGGGAGTCCCAAGAGTGAGGATTTGAACCCCGGTTTTA  
CCACTCAACCAGGCAGCAGAGATTCATCTAGGAAGAGAAAGGCGATGCCGACTTGGAAGTGAACAAGG  
GCAAGCTAGACCTGAGAATGGGATGGAAGGACCGCCTGAGGACGGTCATAGTTGGAGGAAGTACGGT  
CAGAAGGACATTTTGGGAGCCAAGTATCCTAGAAGCTACTACAGATGCACATACCGCGACATGCAAGG  
ATGTTGTGCTATCAAACAAGTGCAGCGAAATGATGAAAACCCTTTGGTATTTGACATCACCTATAAAGG  
GAAGCACACATGTACGCCGACCCACGTTCAAAGTCTGCGGCATTATCATCTGAAAAACAGGAATGCA  
ATAGACGACATAACATTGCCATCACAGAATACCAGCAGCAGCCTGATGTGACGCTGAATTTCCAGACAG

GGCCAACCATTGATATACAAAACATAGAACATCAACAGTTGGGCCTCCCATTGACTCCAGAGGGATTAG  
GATATGAAATTCATACCTTGGCACCATCAGCACTTGATGATAATAACTTCTATAGTAGTTTTCCACCATCT  
TTCATACCATCTCCAGCTACCTCAGAATCAAACCACTTCTCTACGTCGCCCTGCAAAATGAGCACCTTT  
GGAGGAGCTCAACATGGACAGCAATCTGAATCAGATATTACAGAGATAATTTAGCCACTACTTCAATA  
ACCAACTCCCCAATTGTTGGTGTACATTTTCCACTAGAACAAATGGGACTTCAGCCTGAGTTTCCCATT  
GACAACCCAACTTTT**TTCCCTAGTTTCTATTAA**

>*HmoWRKY30*

ATGGAACAAGCCTTGTTGATTACCAAGGAGCTAACCGAGGGCATGGAGAAGGCTATACAGCTAAAAGC  
TCATATGGGTCAGCAAGTTTCAGGTAAGATTGAGGGAATGCTGATAGAAGGGATACTATCTTCCTTTGA  
GAATGCCCTCTTGATTCTGAAATGGGGTGGGTCAATGGAACAGTCTCACCAACATGTGGTGCCATCGAC  
CAGTATGCCCGGATCACCACAGTCGGTCATTGGGAGTCCCAAGAGTGAGGATTTGAACCCCGGTTTTA  
CCACTCAACCAGGCAGCAGAGATTCATCTAGGAAGAGAAAGGCGATGCCGACTTGGAAGTGAACAAGG  
GCAAGCTAGACCTGAGAATGGGATGGAAGGACCGCCTGAGGACGGTCATAGTTGGAGGAAGTACGGT  
CAGAAGGACATTTTGGGAGCCAAGTATCCTAGAAGCTACTACAGATGCACATACCGCGACATGCAAGG  
ATGTTGTGCTATCAAACAAGTGCAGCGAAATGATGAAAACCCTTTGGTATTTGACATCACCTATAAAGG  
GAAGCACACATGTACGCCGACCCACGTTCAAAGTCTGCGGCATTATCATCTGAAAAACAGGAATGCA  
ATAGACGACATAACATTGCCATCACAGAATACCAGCAGCAGCCTGATGTGACGCTGAATTTCCAGACAG  
GGCCAACCATTGATATACAAAACATAGAACATCAACAGTTGGGCCTCCCATTGACTCCAGAGGGATTAG  
GATATGAAATTCATACCTTGGCACCATCAGCACTTGATGATAATAACTTCTATAGTAGTTTTCCACCATCT  
TTCATACCATCTCCAGCTACCTCAGAATCAAACCACTTCTCTACGTCGCCCTGCAAAATGAGCACCTTT  
GGAGGAGCTCAACATGGACAGCAATCTGAATCAGATATTACAGAGATAATTTAGCCACTACTTCAATA  
ACCAACTCCCCAATTGTTGGTGTACATTTTCCACTAGAACAAATGGGACTTCAGCCTGAGTTTCCCATT  
GACAACCCAACTTTTTTCCCTAGTTTCTATTAA

>*HuWRKY31*

**ATGGAAACAACAGGATGGGGAC**TTGCCCTTGAATCTGATCATCATCATCACCGTCATCACCATCATCGTA  
TTCTCCTCCTCATCATCATCACGCTAGTCTCCTCGCCTTGAAAGGTGGAGGAAGCAGTAACAATCGGC  
TGTTCCCTGGTGTAGACTTCCCCATGAATCTCAACCGTCGAGATTACCATGATCATGATGATGATCAGAC  
TGGCCATAAGGTGGTAGTGGGTGAAGTTGATTTCTTCTCTGATCAAAAGAGTGCAAAGAGGACGTCAT  
CACCTCATCATAGTAGTTATCATGCCAAGGAGGAGGGTTGTCCTCGAGATCACCATCATCATCCTGCTCC  
AGCTGCCCCTGATTCCAACCCTGACCTGCTCCATGTAAATACTGGCCTACATCTCCTCACGACAAACAT

GGGAAGCGATCAATCTACTGTAGATGACAGTGCCTCTTCAGATGCAGAGGACAAGAGAGCCAAAAATG  
AGTTAGCAGCACTTCAAGCCGAGCTAGAGCGAATGAATGCCGAAAACCAGAGGTTAAAGAACATGCTA  
TCTCAAGTGAGCCACGACTACAGTAACCTTCAAGTGCACTTCGTATCTTTGATGCAACAACAACAT  
CAAAAGGGTGAAAGCACCCAATCACATGAGGTGATTCAAGGGAAGGGGGAGGGAAGGAGGAACATA  
GTGCCGAGGCAGTTCTTAGACATGGGTCCGAGCTCAAACAATGACACCGATGAGCTGACCTCTCAAAC  
ATTATCCGATGATGAGCAAACCCTTGATGGTTCACCCCATAAACAAGAGGGTAATGGCTCGTACGAGCA  
TGGCAAAGGTGGTAGTCATGGAAGAGAAGATAGCCCTGAAGACGCTGAGTGGGTACCTAATAAGGCTC  
CCAAGCTGAACCTACCAAAGGGTAATAATGGCCCTGTTGATCAAGCTGCCGCGGAAGCTACCATGAGG  
AAGGCTAGAGTCTCCGTTCGAGCCCGGTCTGAGGCGCCCATGATAAGTGATGGATGCCAGTGGAGAAA  
ATATGGACAGAAGATGGCTAAGGGTAACCCTTGCCCTCGAGCTTATTATCGTTGCACAATGGCCGTCGG  
TTGTCCTGTTGCGAAACAAGTTCAAAGATGTGCAGAGGACAGATCAATACTAATTACAACGTACGAGG  
GTAATCACAACCATCCACTACCACCGGCGGCCATGGCGATGGCCTCAACCACAGCAGCGGCCGCTAGC  
ATGCTCCTCTCGGGATCAATGCCTAGTGGTGATGCACTAATGAACCCTAATTTTCTAGCAAGGACAATCC  
TCCCATGCTCATCAAGCATGGCCACAATATCAGCCTCAGCCCCCTTCCCAACAGTTACCCTAGACTTGA  
CCCATTACCCGAACCCTCTCCAACCTCAAAGGGCACCCCATGTACCCCAACAAACTGCCCCCTTCCAAT  
TCCCCTTCCCCACACCAAATGGGCCAGTGGCCTCCAACCTTTATGGCCTCATTGCCCCAAATATTTGGCCA  
AGTCTTCAACAATACTACTAATAGCAACCAATCAAAATTCTCTGGCCTACATACCTCATCCTCCTCTGCC  
TCCGCACAAGCGTTGGACGCCGCCATTTGCAACTACCTAATCAAAACGCTGCGTTTGCTGACACTCTC  
AGTGCTGCCACCGCCGCCATCACCTCAGACCCCAACTTCACCGCCGCACTTGCTGCCGCCATCTCGTCC  
ATCATCGGTGGCGGGGCTCGGCCAGGCGAAAATAATGTTGCCAATAATGCCCCTGTGAACTCCCCTCAC  
GGTGGTGGCGGTGCCACTAGTGGCAATAAAGTCAATTCAAGTAGCTAG

>*HmoWRKY31*

ATGGAACAACAGGATGGGGACTTGCCCTTGAATCTGATCATCATCATCACCGTCATCACCATCATC  
GTATTCCTCCTCCTCATCATCATCACGCTAGTCTCCTCGCCATGAAAGGTGGAGGAAGCAGTAACAATC  
GGCTGTTCCCTGGTGTAGACTTCCCCATGAATCTCAACCGTCGAGATTACCATGATCATGATCATCATGA  
TGATGATCAGACTGGCCATAAGGTGGTAGTGGGTGAAGTTGATTTCTTCTCTGATCAAAAGAGTGCAAA  
GAGGACGTCATCACCTCATCATAGTAGTTATCATGCCAAGGAGGAGGGTTCTCCTCGAGATCACCATCA  
TCATCCTGCTCCAGCTGCCCCTGATTCCACCCCTGACCTGCTCCATGTAAATACTGGCCTACATCTCCTC  
ACGACAAACATGGGAAGCGATCAGTCTACTGTAGATGACAGTGCCTCTTCAGATGCAGAGGACAAGAG  
AGCCAAAAATGAGTTAGCAGCACTTCAAGCCGAGCTGGAGCGAATGAATGCCGAAAACCAGAGGTTA

AAGAACATGCTATCTCAAGTGAGCCACGACTACAGTAACCTTCAAGTGCACTTTGTATCTTTGATGCAA  
CAACAACAACATCAAAAGGGTGAAAGCACCCAATCACATGAGGTGATTCAAGGGAAGGGGGAGGGA  
AGGAGGAACATAGTGCCGAGGCAGTTCTTAGACATGGGTCCGAGCTCAAACAATGACACCGATGAGCT  
GACCTCTCAAACATTATCCGATGATGAGCAAACCTTGATGGTTCACCCCATAAACAAGAGGGTAATGG  
CTCGTACGAGCATGGCAAAGGTGGTAGTCATGGAAGAGAAGATAGCCCTGAAGACGCTGAGTGGGTA  
CCTAATAAGGCTCCCAAGCTGAACCTACCAAAGGGTAATAATAGCCCTGTTGATCAAGCTGCCGCGGA  
AGCTACCATGAGGAAGGCTAGAGTCTCCGTTGAGCCCGGTCTGAGGCGGCCATGATAAGTGATGGAT  
GCCAGTGGAGAAAATATGGACAGAAGATGGCTAAGGGTAACCCTTGCCCTCGAGCTTATTATCGTTGCA  
CAATGGCCGTCGGTTGTCCTGTTGCGAAACAAGTTCAAAGATGTGCAGAGGACAGATCAATACTAATTA  
CAACGTACGAGGGTAATCACAACCATCCACTACCACCGGCGGCCATGGCGATGGCCTCAACCACAGCA  
GCGGCCGCTAGCATGCTCCTCTCCGGATCAATGCCTAGTGGTGATGCACTAATGAACCCTAATTTTCTAG  
CAAGGACAATCCTCCCATGCTCATCAAGCATGGCCACAATATCAGCCTCAGCCCCCTTCCCAACAGTTA  
CCCTAGACTTGACCCATTCACCGAACCCTCTCCAACCTCAAAGGGCACCCCATGTACCCCAACAAACT  
GCCCCCTTCCAATTCCCCTTCCCCACACCAAATGGGCCAGTGCCCTCCAACCTTTTGGCCTCATTGCCC  
CAAATATTTGGCCAAGTCTTCAACAATACTACTAATAGCAACCAATCAAAATTCTCTGGCCTACATACCT  
CATCCTCCTCTGCCTCCGCACAAGCGTTGGACGCCGCCATTCACCTCTGACCCCAACTTCACCGCCGCACTTGCTG  
TTGCTGACACTCTCAGTGCTGCCACCGCCGCCATCACCTCTGACCCCAACTTCACCGCCGCACTTGCTG  
CAGCCATCTCGTCCATCATCGGTGGCGGGGCTCGGCCAGGCGAAAACAATGTTGCCAATAATGCCCCCT  
GTGAACTCCCCTCACGGTGGCGGCGGTGCCACTAGTGGCAATAAAGTCAATTCAAGTAGCTAG

>HuWRKY32

ATGGCCTCTAACCTGGAATTGCTGTGGATACAGACCCAAAATCAAAACCCCAGGATGAAACAACCCC  
AGATTCTAAAATTTTCATCTCAACCCACCACCACTTCAACTTCTGATTCAAAGTCTCTAACTTTACCTTCA  
ACTTCTAACAACAGTCAAGTGGGTACCCTTCTTTCTCTAAGCTTCTGGAGGGTGTTATGGCTGCTAGT  
TCGACTCTCTTAGGCAAAGATGCTAGCTTTAAGGGACAACCTTAGGATGTCTCATCAAGAGGCTTTGGCA  
AATGTTACTGCTAAAGCAGCTCAAACCTCAAGTGCAGCAGCCTGAAGCTAAGTCTGCGAATTCCTCAAT  
TGAGCCGCCACCAAGTGAGCAACTTGAATCATCTGTTCCAAGTCCATCTGCGATTGTACGCGAAGAAA  
AACCATCCTTGCAACATAAAGATAATGTGCAAGAGGGAAACAATAAAAAATCTTCCTGCCCTGGCTCG  
AAGCCTAGAGATTCTTCACCCTGTAAACCTCTTGCTGCGGAATTGGCTAAGGAGAAAGTTGATAAGCA  
AGATTGGAAGCAGGGAAACTCCTGCTATAGTAATGAACAAGCAGATGATATCCGAAGGACACCCAACT  
CAGATGGGTATGGCTGGAGAAAATATGGCCAAAAGCAGGTGAAGAATTCTGGGAGTTCTAGAAGCTAT

TATCGATGCACGTTTTATAATTGCTTTGCTAAAAAGAAGGTTTCAGCATTTGGACGTATCAGGCAAGATAG  
TTGATGTTGTTTATAAGGGTGACCATAACCATGACCCACCTCAAAATCTTAAGGCTTCAAGCCGGAAGA  
GGGATGCACCATCAGCTGCACAGGTGAATGATCTTAGTAGCAGTTCAGTGCAAAAGCTCGGTGATCCA  
CATACACCAACATCTACATGTAGGAAGGAGGTTTCAGCAAGAAGTACCACCACTTACTCGTGAATGTGG  
GGAAATAAACTGAGTACTCCTGCTAGCTCACCAGAAGAGAAAGATGTGGGGGAAGAAAGCATCACG  
ACCCCTGATTCAACTCGAAGACTTAAAAGTGAGGAACCAACCTTGTTCAGCAGAGGCGGAACATTATAA  
ATCAAGTAAATCCAATGAAGTCAGCGTGAAGGAGTTTCGAAGTTATCCCTTTGAAGAAAAGAAGGATAA  
AAGAAAGTGGTCAAACATGTTTCAGAGTCTGTGTATAGGACATTCAAGGAGCCTAAAGTAGTTGTGCAT  
GCTTCTGGGGATGTGGCAAGCTCAAGTGATGGATATAGATGGCGAAAATACGGGCAGAAGATGGTCAA  
AGGAAACCCAAATCCCAGGAGCTACTACAGGTGTTTCATCAGCCGGGTGCCCGGTTAGAAAGCATGTCTG  
AGAGGGCAACCGACAATTCAACTGCGATCATAGTCACATACGAAGGCATACACGACCATGACAAGCCG  
GTCCCCAAGAAGTGTCATGGCTCACCAAAATCCCCAGTCCATGCGAGTTATGCAACTGCAAACAGCAC  
CGCGGTTGAGAAGTCAGAAGCCAAGTCCCCACCTCCGAGTCAAGGACCTTCAGCACCGCAATCCAGA  
GATGTTGTCAACAGTGATGCCAATGGAGATAAGCCTGGGGGAAGCCGGTACTGACAAGGTGTTGGAATC  
AGCTCGAACGCTGTTGAGCAT

TGGAATTGAGCTCAAGTCTTGCTGA

>*HmoWRKY32*

ATGGCCTCTAACCTGGAATTGCTATGGATACAGACCCAAAATCAAAACCCAGGATGAAACGACCCC  
AGATTCTAAAATTTTCATCTCAACCCACCACCACTTCAACTTCTGATTCAAAGTCTCTAACTTTACCTTCA  
ACTTCTAACAACAGTCAAGTGGGTTACCCTTCTTTCTCTAAGCTTCTGGAGGGTGTTATGGCTGCTAGT  
TCGACTCTCTTAGGCAAAGATGCTAGCTTTAAGGGACAACCTTAGGATGTCTCATCAAGAGGCTTTGGCA  
AATGTTACTGCTAAAGCAGCTCAAACCTCAAGTGCAGCAGCCTGAAGCTAAGTCTGCGAATTCCTCAAT  
TGAGCCGCCACCAAGTGAGCAACTTGAATCATCTGTTCCAAGTCCATCTGCGATTGTACGCGAAGAAA  
AACCATCCTTGCAACATAAAGATAATGTACAAGAGGGAAACAATAAAAAATCTTCCTGCCCTGGCTCGA  
AGCCTAGAGATTCTTCACCCTGTAAACCTCTTGCTGCGGAATTGGCTAAGGAGAAAGTTGATAAGCAA  
GATTGGAAGCAGGGAAACTCCTGCTATAGTAATGAACAAGCAGATGATATCCGAAGGACACCCAACTC  
AGATGGGTATGGCTGGAGAAAATATGGCCAAAAGCAGGTGAAGAATTCTGGGAGTTCTAGAAGCTATT  
ATCGATGCACGTTTTATAATTGCTTTGCTAAAAAGAAGGTTTCAGCATTTGGACGTATCAGGCAAGATAGT  
TGATGTTGTTTATAAGGGTGACCATAACCATGACCCACCTCAAAATCTTAAGGCTTCAAGCCGGAAGAG  
GGATGCACCATCAGCTGCACAGGTGAATGATCTTAGTAGCAGTTCAGTGCAAAAGCTCGGTGATCCAC  
ATACACCAACATCTACATGTAGGAAGGAGGTTTCAGCAAGAAGTACCACCACATACTCGTGAATGTGGG

GAAATAAACTGAGTACTCCTGCTAGCTCACCAGAAGAGAAAGATGTGGGGGAAGAAAGCATCACGA  
CACCTGATTCAACACGAAGACTTAAAAGTGAGGAACCAACCTTGTCAGCAGAGGCGGAACATTATAAA  
TCAAGTAAATCCGATGAAGTCAGCGTGAAGGAGTTTGAAGTTATCCCTTTGAAGAAAAGAAGGATAAA  
AGAAAGTGGTCAAACATGTTTCAAGTCTGTGTATAGGACATTCAAGGAGCCTAAAGTAGTTGTGCATG  
CTTCTGGGGATGTGGCAAGCTCAAGTGATGGATATAGATGGCGAAAATACGGGCAGAAGATGGTCAAA  
GGAAACCCAAATCCCAGGAGCTACTACAGGTGTTTCATCAGCCGGGTGCCCCGGTTAGAAAGCATGTCTGA  
GAGGGCAACCGACAATTCAACTGCGATCATAGTCACATACGAAGGCATACACGACCATGACAAGCCGG  
TCCCCAAGAAGTGTCATGGCTCACCAAAATCCCCAGCCCATGCGAGTTATGCGACTGCAACCAGCACC  
GCGGTTGAGAAGTCAGAAGCCAAGTCCCCACCTCTGAGTCAAGGACCTTCAGCACCGCAATCCAGAG  
ATGTTGTCAACAGTGATGCCAATGGAGATAAGCCTGGGGAAGCCGGTACTGACAAGGTGTTGGAATCA  
GCTCGAACGCTGTTGAGCATTGGAATTGAGCTCAAGTCTTGCTGA

>HuWRKY33

ATGTCTTCCTCAGTGGCAAGCATAGAGAGCAACAGCTTCTCCTTCACAGGCCTCATGGCGTCCTCCCC  
TTCCTGATTTCTTTGCTCATAATGATGATGAAACCTTGCCAAATGCGTACCAAAACCACGAAATTACTA  
ATAACAATACGACCCACGACAACCATAATAGCTGCTGGGGAGGGTTCGAACAGCTGGTTGAAGTGCCC  
AAGTTCAAGTCTTTAGCCCCTGCTCTCTCTGTCTATCATCATCATCATGATGATGATCATCATCAATC  
TGCTGCTCCTGTTTCTCCCTCTTCCTTCTTGACCACTCCTCATTCTTTTAGCCCTTCCATCTTCTTGATT  
CCCCCTCCGTAATAGTTTTCCATCAACAGTGGAGGCATTTGGTGGTGAGAGATTCAATTATAGTGGCTC  
CAATGGTGAGGCCCAACAGGGTACCGATGATGAAGAAAGAAGCAACAACAATTTCTCTTTCCATGCTC  
CAAACATCTCAACGGAAGGATGGAATTTAGATGCACCCAAGAAGCAAACCTGATCTGAATTTTAACAAA  
GAGCAACCCGGTTCGAACCCGGGGTTCATCCAAAATCAAATAGTACCCCCAAAATAGCCACGGCACA  
ACCAGAGGCTACTATGCAGAGAAGTTACAACCATCTCAGACTCAGCCTGCTGTGCAGATGAACAGAG  
CCCAGAAAAGATCGGAGGACGGGTACTGCTGGAGGAAATACGGGCAAAAACAGGTCAAGGGGAGCG  
AAAATCCCCGGAGTTATTACAAGTGCTCGTACCCGAATTGCCCTACAAAGAAGAAGGTGGAGAGGTCT  
CCTGAAGGGTATGTCACTGAGATTGTTTATAAGGGGAGTCACAACCACCCCAAGCCTCAGCCCGGCAG  
AAGATCATCAGTTCAGAACAAATGCATTTGATGGTTCAGAGGGTTCTAATGCATCAGGTGCTCACGCGCA  
GACTGAGTACTCTACTTTACCCCTGAGACATCGTCCGTTTCTCTAGATGACGATGATGAATTTGATCAG  
ACTTCTGCTATGAGCAGATCAGGCAAGGATGACGAGAATGAACATGAAGCCAAAAGATGGAAGGGCG  
ACAATGAAGGGGAGGTTCATATCAGGCTATGGAAGCAAAACTGTCAGAGAACCAAGAGTCATAGTTCAA  
ACAACCAGCGAGATTGATATTCTTGATGATGGGTATAGATGGAGAAAATATGGGCAGAAAGTAGTGAAG

GGCAACCCTAATCCTAGGAGTTACTACAAATGCACAAGCTCCGGGTGCCCTGTAAGGAAGCACATAGA  
GCGGGCATCCCATGACTTGAAGGCTGTTATCACAACCTATGAAGGGAAACACAACCATGATATTCCTGC  
TGCTCGTGGTAGCAGCACCTATAACGCCCCCATTCCAGTTAGGCCATCCGCCATTAGCAGCCGACAAAA  
CCAGCCAGTCAGCGTGAAGCATCTCAGTAACAGTACCAGCACGTCTGGACCAGAAGCTCAATCACCCCT  
TCAGCTTACAGATGCTGCAAGGACATGGTAACTTCGGGTTCTCAGCGTTTGGGAATCCATCTGGAGCCA  
AGGATGAGCCAATGGACAACA **CATTTT TAGACTCATTCTTCATTGA**

>*HmoWRKY3*

ATGTCTTCCTCAGTGGCAAGCATAGAGAGCAACAGCTTCTCCTTCACAGGCCTCATGGCGTCCTCCCC  
TTCCTGATTTCTTTGCTCATAATGATGATGAAACCTTGCCAAATGCGTACCAAAACCACGAAATTACTA  
ATAACAATACGACCCACGACAACCATAATAGCTGCTGGGGAGGGTTCGAACAGCTGGTTGAAGTGCCC  
AAGTTCAAGTCTTTAGCCCCCTGCCTCTCTCTGTCTATCATCATCATCATGATGATGATCATCATCAATC  
TGCTGCTCCTGTTTCTCCCTCTTCCTTCTTGACCACTCCTCATTCTTTAGCCCTTCCATCTTCTTGATT  
CCCCCTCCGTAATAGTTTTCCATCAACAGTGGAGGCATTTGGTGGTGAGAGATTCAATTATAGTGGCTC  
CAATGGTGAGGCCCAACAGGGTACCGATGATGAAGAAAGAAGCAACAACAATTTCTCTTTCCATGCTC  
CAAACATCTCAACGGAAGGATGGAATTTAGATGCACCCAAGAAGCAAACCTGATCTGAATTTTAACAAA  
GAGCAACCCGGTTCGAAACCGGGGTTTCATCCAAAATCAAATAGTACCCCCAAAAATAGCCACGGCACA  
ACCAGAGGCTACTATGCAGAGAAGTTACAACCATTCTCAGACTCAGCCTGCTGTGCAGATGAACAGAG  
CCCAGAAAAGATCGGAGGACGGGTACTGCTGGAGGAAATACGGGCAAAAACAGGTCAAGGGGAGCG  
AAAATCCCCGGAGTTATTACAAGTGCTCGTACCCGAATTGCCCTACAAAGAAGAAGGTGGAGAGGTCT  
CCTGAAGGGTATGTCACTGAGATTGTTTATAAGGGGAGTCACAACCACCCAAGCCTCAGCCCGGCAG  
AAGATCATCAGTTCAGAACAAATGCATTTGATGGTTCAGAGGGTTCTAATGCATCAGGTGCTCACGCGCA  
GACTGAGTACTCTACTTTACCCCTGAGACATCGTCCGTTTCTCTAGATGACGATGATGAATTTGATCAG  
ACTTCTGCTATGAGCAGATCAGGCAAGGATGACGAGAATGAACATGAAGCCAAAAGATGGAAGGGCG  
ACAATGAAGGGGAGGTTCATATCAGGCTATGGAAGCAAACTGTCAGAGAACCAAGAGTCATAGTTCAA  
ACAACCAGCGAGATTGATATTCTTGATGATGGGTATAGATGGAGAAAATATGGGCAGAAAGTAGTGAAG  
GGCAACCCTAATCCTAGGAGTTACTACAAATGCACAAGCTCCGGGTGCCCTGTAAGGAAGCACATAGA  
GCGGGCATCCCATGACTTGAAGGCTGTTATCACAACCTATGAAGGGAAACACAACCATGATATTCCTGC  
TGCTCGTGGTAGCAGCACCTATAACGCCCCCATTCCAGTTAGGCCATCCGCCATTAGCAGCCGACAAAA  
CCAGCCAGTCAGCGTGAAGCATCTCAGTAACAGTACCAGCACGTCTGGACCAGAAGCTCAATCACCCCT  
TCAGCTTACAGATGCTGCAAGGACATGGTAACTTCGGGTTCTCAGCGTTTGGGAATCCATCTGGAGCCA

AGGATGAGCCAATGGACAACACATTTTTAGACTCATTTCTTCATTGA

>*HuWRKY34*

ATGTTCCCCTCTTCCATGCCCTCTTTTCCAACCTGGAGGGCAGAACCAGCAGCAACATCAACAATCATCA  
TGGAGTACAGGAGAGCAGAAGCAACAGGATGGTCATTATCAACCATCCAAATTGGTAAATTCCCAGGG  
TCAGACACAGGGTCAATCTGAAAATTATAATATCAAATATGAGGCGGATCAGAGTTCTTCTTACCAAGC  
ATCTGATTATGCAAGAGAAAGAGAGCAAAGTAGTAGAAAGTCAGATGATGGGTACAACCTGGAGAAAAT  
ATGGGCAAAAACAGGTAAAAGGGAGTGAAAACCCTCGGAGTTATTACAAGTGACATATCCCAATTGT  
CCCATGAAGAAGAAGATTGAGACGGCTCTTGATGGCCGAATCACTGAGATTGTTTATAAAGGTAGCCAT  
AACCATCCGAAGCCAGTTAATAACCGAAAATCAGCCTTAGCCTCAGCTTCATCATCCTTTCAAGCCTTG  
CTAATTCCTCCTTATAATGATTACCAAGATCACTCTTCTTCGGGGGTGTTGCCACAGGGATCATCTGGGC  
AAACTGACTCGGTTGCTACCCCAGAGAACTCCTCGATTTTCGATTGTTGATGATGAGCAGGACATGGGTT  
CTCAGAGGAGTAGATCAGCTGGATCTGGGGACAATGATTTTGATGATGATGATGTTAATAATGAACCTAA  
TGCCAAAAGATGGAAAGGGGAAATTGGTGAAAATGAATGCATCTCAACAGCTGTTCTTGGGGCTGGGA  
CTGTTAGTGGAACAGAACAGTCAGAGAACCAAGAGTGGTTGTTTCAGACCACAAGTGACATCGATATT  
CTGGATGATGGATATAGATGGAGAAAATATGGTCAGAAAGTTGTCAAGGGCAATCCTAATCCAAGGAGC  
TACTATAAGTGCACTCATCCGGGTTGCCCAGTGAGGAAACACGTGGAACGGGCTGCTCAAGATCTAAG  
GTCAGTGATCACCATTATGAAGGCAAGCACAACCATGATGTTCTGCTGCTCGAGGCAGTGGAGTCA  
ACAGGGCCAACAACATCCATGGCATGGGCACTGGGGCAGGGGTGGTTCCATCCATGGCCGTAAGGCCA  
TCTGCGTTAAATTATATGGGCTCGATCAACCCTAACCCTGACTCTAACCTTAACCTCAACGCTCGGATGC  
CCACTTCAAACCTACGCAGTTCGAGGTCCCCAAGGCCAAGGGACCGTGCAGTTACCCCCCTTTGCATTA  
GAGATGCTGCAGAATAACCCTGGGAGTTTTGGCTTCTCATCAGGGTTAGGATTGATGAATCAAGTTCAA  
GCCAAGGAAGAACC AAAAGATCATGACATGTAATTTGATTCTTTTCTGTA

>*HmoWRKY34*

ATGGGGGACAGTGAAGATGCATTGGATGAGTGGAGGGATCTTGTGGTGAGTCCTAAGGGACTATTCTC  
AGTCTTTTCACCTGAGCGCTGTGTTACAAAATCAATTGCTGATGTTTTAGTGATCGGAAGGGGATTG  
GGGGGGTGCTGATGACAAAGAAATGGAGAATTCAGTGTTTGATTTCGGGGAAGAAGTTGGAGGATTGT  
GAGCAGGGATGGGATTCTTCGATTGTCGAGGATGATTTGGATGTGCCCATGGCAGGAGGGAGCATAGT  
GGATACGAGGGCTGCTAAGTTGGGGTTCAATGCTCCTAACACAAGCTCCCCCTCCTTTTAGCTCTAGCAG  
CCCGTTGCCCTCCCCAGGTTCTCGATCACCTATCTTATCGCACCTGCTAGTATTAGCCCTACTGGACTG  
CTTGACTCTCCACCTTTGCTGCCAAATTCACAGCCTTCTCCAACCACAGGAACTTTTGAATCACCTCCT

GAGGGTGGAAACAATCAGATGGAGATTCCAGCATCTTCTGCAGGCACGGACAAGCACAATGATGGTGG  
CACTACAACCATGATTAAGGCCAATGATGCCATTCTATCACATGTTTCTGTGCCGTAGAAAATGAGGG  
GTCCCCTGGTGGTTTGGCTCAGAGTTTGGTTGCTCGTGTTTCATGGTCAAAGTATTAACACAATGCCGCT  
ACCAGTGAACCTCGAAATTCCAATGCAGTTTCCTAATGAAGTTGCCATGAAAAGTCATGAAATTGGCTC  
ACCAAATGATGAACAGTTGTCTGGATGACATCACTGTAGACTCCAACCCCACTCTGCAACCATGCCA  
TTCGACGACTTTGGTATGTGATCAATTGCAGGAAAAGGGCGAACCGTCTCTGGAAGAGGATGCTGATA  
CTTATAATGCCCTGGATTTCAGAACACAAAGGAACATATGCTCCAACAGGGACAGTGAGAACCACAGAA  
GATGGGTACAATTGGAGAAAATATGGACAGAAAACAAGTCAAGGGTAGTGAATATCCACGCAGTTACTAT  
AAATGCACCCACCCAACCTGTCAAGTGAAGAAGAAGGTAGAACGTTCTCATGATGGCCAAATTACAGA  
GATTATATACAAGGGTGGCCATAACCATCCAATGCCCCAACCCCTGTAGGAAATCAGCATTTAGTTCATCA  
TTACCATTTCTGTGAGACATCAGATATATGTGACGGTATTAGCTCTTGCGTCAAACTGAGAGTGAATCAA  
CCTGGAGAAACATGCAGCCAGGGAGTAAAGGTGGCATGCCTGGGTCTGACTGGAGGACTGATGGCTT  
GGACAGGGCATCCTCTACCTCTGTTGTGACTGAAGTTTCTGATATCCTGTCCACCAATCAAGAAAAACC  
CTTATGCATGCTTGAATCAGCAGGAAGTCCAGAGTTCTCATCTACAATTGCTATTAATGAGGATGATGAA  
GAAGATACTACCACCCAAGGGGGTTGTTTACTTGCAGATGATGATGACAATAAATCAGACTCAAAAAG  
AAGGAAAAAGGAGTCTTGTTTTTATGAAACAACTTTAGGTTCCAGGGCTGTTTCGCGAACCAAGAGTTG  
TTATCCAAATAGAGAGTGATATTGATATACTAGATGATGGGTATCGCTGGCGCAAGTACGGGCAGAAGG  
TTGTGAAGGGGAATCCAAATCCTAGGAGCTACTACAAATGCACCCGTCCTGGATGCCCTGTCAGGAAG  
CATGTGGAAAGAGCCTCACACGACTTGAAATTTGTGATAACAACGTATGAAGGAAAACACAATCATGA  
AGTCCCTGCTGCTAGAAATAGCTGTCATGCCAATTC

AAGCAGTGGAGGCTTGCCCCCTCCACATCCAGTACACAGGCTACCCTGAACTTACCGCGAAACCCTC  
ATCTTCCAAAGCCGGAGTCTCATGTACAAGATCTCCCCCTCATTTTGGCAGAAAATTGGAGTGCAATA  
GTGACTTCTTAGGAGCGAACTTTCTAGGGAATTTTGGAGGCGGAGCTTCCTCATTTTATCAAATGAAGT  
TTCCAGCCTTACCGAATGCTGTACCGTATGGTCCATTTAGTTTGAGTAATCACCATCCAACTTTCCCCGG  
CAATGTGGTGCCAGGCTTCGCAGATCTTTCCCTCCCATTGCCACTCGGATTCCCCCATTCCTCAAATTTA  
GCCATTGCCAACTATACCAATCCTGGAAGACCACTTGCTTCAGTCCAGCCCTTCATGGCAGGCCATCAC  
CATGAGGAACCTAACTCCAAGATCCTTAGACCTAAGCAGGAACAGGGAGATGACTCATTTTGTGATAC  
AGGAATGCATCACATCGACCATAACCATGTCTTCATCATCATCTATATACAGCCAAATTGTGTGA

>HuWRKY35

ATGGTAATGGATAATAAACGTCGGGCTAGCTCACCGGTCACCACTTCTGATCACGACGGGCCTCAGAGC

TCATCGGAGAATGCACCTGATTTCGCATCCTTCAGCTGATCGTGACCCGAGAACCACTAACATGGGCCCC  
AGCCACCTTTTGGCTAAGAAAAGGAGCATAAAGAAGAGGGTGGTATCCGTGAAAATAGGAGATAAGGA  
TGGAACAAGGAGCAAAGGGAAGGCGTATCCACCGTCTGATGCATGGGCTTGGAGAAAATACGGCCAG  
AAACCCATCAAAGGCTCTCCTTATCCCAGGGGATATTATCGGTGCAGTAGTTTCAAGGGCTGTCCTGCT  
AGAAAACAAGTCGAGAGGAATCGGGCAGACCCACCACACTCATCATCACCTATGCTTATGAGCACAA  
CCACCCCTTGCCACCTCCAGCCACCACCACCACGCTGCCGACACTTCAACCGCCTCCACCACTGACA  
CTGCCAGTCCAACCACCCCATCCGCCACCACAACCACTGCCTCAACTGATGCTCCTGATGATTCAACTG  
ACAATGGGGAGCCGGAGGCAGAGCTATCATCACTTCCTGTTCAAGAAGTTATCCCCTTTCGAGATTCAA  
ACCACCTTGAGTTCATCGGAGACTCATCCATACTAGGCTGCTTAGGGGTGGAATACACTTGGGTGTCTG  
ACATGCCATTTCGAGATGCCATCCCTTGTGTGGCCCAATAGTGGGGATGCTGATGTGTTGGCATACTCAAT  
TCGGGAGGAAGATGAACTACTGTTTGGGGACCTAGACGAGCTCCCAGAATGCTCCATTGTCTTTTCGAA  
AGAGAAATGGAGGCATCAAAGGTGTGCGACAACTCCCATATATGGCAACACGTAG

>*HmoWRKY35*

ATGGTAATGGATAATAAACGTCGGGCTAGCTCACCGGTCACCACTTCTGATCACGACGGGCCTCAGAGC  
TCATCGGAGAATGCACCTGATTTCGCATCCTTCAGCTGATCGTGACCCGAGAACCACTAACATGGGCCCC  
AGCCACCTTTTGGCTAAGAAAAGGAGCATAAAGAAGAGGGTGGTATCCGTGAAAATAGGAGATAAGGA  
TGGAACAAGGAGCAAAGGGAAGGCGTATCCACCGTCTGATGCATGGGCTTGGAGAAAATACGGCCAG  
AAACCCATCAAAGGCTCTCCTTATCCCAGGGGATATTATCGGTGCAGTAGTTTCAAGGGCTGTCCTGCT  
AGAAAACAAGTCGAGAGGAATCGGGCAGACCCACCACACTCATCATCACCTATGCTTATGAGCACAA  
CCACCCCTTGCCACCTCCAGCCACCACCACCACGCTGCCGACACTTCAACCGCCTCCACCACTGACA  
CTGCCAGTCCAACCACCCCATCCGCCACCACAACCACTGCCTCAACTGATGCTCCTGATG  
ATTCAACTGACAATGGGGAGCCGGAGGCAGAGCTATCATCACTTCCTGTTCAAGAAGTTATCCCCTTTC  
GAGATTCAAACCACCTTGAGTTCATCGGAGACTCATCCATACTAGGCTGCTTAGGGGTGGAATACACTT  
GGGTGTCTGACATGCCATTTCGAGATGCCATCCCTTGTGTGGCCCAATAGTGGGGATGCTGATGTGTTGG  
CATACTCAATTTCGGGAGGAAGATGAACTACTGTTTGGGGACCTAGACGAGCTCCCAGAATGCTCCATTG  
TCTTTCGAAAGAGAAATGGAGGCATCAAAGGTGTGCGACAACCTCCCATATATGGCAACACGTAG

>*HuWRKY36*

ATGGGTGAAGTAAGGGAGGAAAATGAGAGGTTGAAGAAGTTGTTAGTGAAAATTGTCAAGGACTATG  
AGTCCTTAGAACAGAAAGTTTCTTCGATAACTCGATTCAACAGTCGGTAGAATCAAATCTAAGTAAGA  
ATCTCCCTGACAACGATAATGAACATGATAGTCAAGTGAATCCCGAGTTGGTTTCTTTAAGCCTAGGGA

GCTGGTCTTCGAAAAAGAAGAAACATGATGATATAAAGCAACAGGTCAGTGATGCTTGGAGTAAAACG  
AGAAAGGTGGATGGAGGGCTTGAGCTTGGGCTCGAATGTAAATTCAAGAATTATTCCACCACTGTTGG  
TGATTTCGGTGAAGAATTCAACACTGGATAGCGGGAATGAAGAGATGGGGGAGGAAAACAACAAAACA  
AAAGAGAATACAAGCTCTAAGGAAGGGGAGGAAGAAAGCTTGCACCCACCTCAAGTCAAGAAAACCT  
AGGGTTTGCATAAGATCAAGATGTGACACCCCTACGATGAATGATGGATGTCAATGGAGAAAGTATGGG  
CAGAAAATTGCCAAAGGAAATCCCTGCCCTCGAGCTTACTACCGTTGTACGGTTTCGCCTTCATGCCCC  
GTGAGGAAACAGGTTCAAAGATGCCCTGATGACATGTCCATCTTGATCACCACCTATGAAGGCACCCA  
CAACCACCCCTCCCTCTCTCGGCCACCACCATGGCCTCCGCCACAACCTGCAATTGCCGCCATGCACA  
AGTCAGACTCCTTTACCTCCTCCTCACAATCATCCTTCGTGGGCCCTACCTTGACTTCATCTTTTGGCTT  
CCATGGCACAACTTGGTCACTCCCTTCAATCATGCCCTAGATTAAGTATCTCTAATCCTTCCATGATCT  
CTGCATCTCACAATTCTCATCCTACCATTACCCTCGACCTCACCACACCGAGCACCGGCCTCTCCCCTTT  
CAACTGGCTATCCTCATCTTCATCTTCTTCCCTAAGAAATTCTTCCAACCTCCTTAACTTCTCTTCCTCTT  
CTGCTTCAACTATGACTTCTTTAGACTTCACTACCAAACCAGCAGGTTCTTCTTGGGGGAGTGGGTACT  
TGAATTATGGGCCATCATTTCCTTACATTAATAGTAGTAGCATCAGTAATACTACTAGTAGTATAAATATTT  
TTGAAAACCCTAACAATCCTCAGCCTTCTCTAGATGAGACAATAACAAAGGCAATTGCAGCAAACCCT  
AATTTCCAATCAGTGTTAGCTGCTGCTATCTCATCATATGTTGGAAACAAGACGACTACTACTACTAGCA  
ATAATAATAGCGAGCAAAGGAAACCATCGCCTGCTTTGTGTAATTCTCAGACAGAAGCTAATGGACGAA  
GCTTATCGTTGTTTCCCACACTTGCATCCAAGAGTACTTCTCATGGAGGTGTGATATAAAAGGACCACA  
GTAGCTGA

>HuWRKY38

ATGTTGAAGGGTTCAATTGAACAAAGGGATCTGATGATACAGCAACTAATTGAGGGGATTGAGGCAGC  
AAGGCAACTCCAAAAGAGGATTCGAAGTGGCCCATCAAAAATTGATCATCATGGTTGTGATTATGATAA  
TCCTCAATTAGGGGAAGATGATCAAGCCCTTAATCACTCATTATTAGATAAGATGGTGGCTTCATTTGAT  
AAGACAATCTCAATTGCAAAACTCCTCAAATTGGAGCTCCAACATCAGTCTGATCATCAACAACCCTCC  
AATAATTCCCAATATGAGGGGTACCCCTCATTCTTTGGCTCTTAGCAGCCCTAGAAGTGAAAACCTCC  
CATCATCATCTTCATTTGGCCAAGAAAAGGAAAATGATGCCAAGGTGTAGCGTGAAGGTAAAAGCTGA  
GGGAGGAACAGGGCTAGAAGGACCTCTCGATGATGGCTACACTTGGAGAAAATACGGACAGAAAGAT  
ATCCTTGGAGCTAAGCATCCTAGAGGATATTACAGATGCACCCATCGCCACACACGAAGTTGTGGAGCC  
ACAAAGCAGGTCCAACGCACAGATGAAGACCCAACCATCTTCCACGTCATCTATCGTGGCGAGCACAC

TTGTTTTCTGTGCCCCATTTCTCCCAAGCTCAATCCAAGCCCAAGAAGCAGACCAAAGTAAAAACCG  
AGCCCAAACCACAACCACCTCCAAGCCCACAAGCACAACCTCAGATGGCTTACTCGCCGGAGCCAGA  
AGTCTATTTGGGCCTGGACCCAGATGGCGCCCTTAAGGTCTGAACCAAACGAGACAGAAAGTCCAGCCC  
AGTTTTTTAGATCCTTTTCGTTACCCCCGGCCCTGTTAGAGCCTGGGCCCATGGACAACCTTCTTATCGGA  
CTGCTACCCTACTTTTGGGTCGCCGGCCACCTCCGAGTCCAACCTATTTTCCGGTCACCGTGCTCAACAT  
ACAAACATCAGAATCGGACCTAAACGGGTCAATATCGGGTCCGAACCTCGGTATCCAATTCCCCCATGGG  
ATGTGACTTCGAGTTCCCCATTGATCAGCTACTAGATATTGAGGCAGATTTTCCTAATTTTGAGTTTTAA

>*HmoWRKY38*

ATGTTGAAGGGTTCATTGAACAAAGGGATCTGATGATACAGCAACTAATTGAGGGGATTGAGGCAGC  
AAGGCAACTCCAAAAGAGGATTCGAAGTGGCCCATCAAAAATTGATCATCATGGTTGTGATTATGATAA  
TCCTCAATTAGGGGAAGATGATCAAGCCCTTAATCACTCATTATTAGATAAGATGGTGGCTTCATTTGAT  
AAGACAATCTCAATTGCAAAACTCCTCAAATTGGAGCTCCAACATCAGTCTGATCATCAACAACCCTCC  
AATAATTCCCAATATGAGGGGTCACCCCCTCATTCTTTGGCTCTTAGCAGCCCTAGAAGTGAAAACCTCC  
CATCATCATCTTCATTTGGCCAAGAAAAGGAAAATGATGCCAAGGTGTAGCGTGAAGGTAAAAGCTGA  
GGGAGGAACAGGGCTAGAAGGACCTCTCGATGATGGCTACACTTGGAGAAAATACGGACAGAAAGAT  
ATCCTTGGAGCTAAGCATCCTAGAGGATATTACAGATGCACCCATCGCCACACACGAAGTTGTGGAGCC  
ACAAAGCAGGTCCAACGCACAGATGAAGACCCAACCATCTTCCACGTCATCTATCGTGGCGAGCACAC  
TTGTTTTCTGTGCCCCATTTCTCCCAAGCTCAATCCAAGCCCAAGAAGCAGACCAAAGTAAAAACCG  
AGCCCAAACCACAACCACCTCCAAGCCCACAAGCACAACCTCAGATGGCTTACTCGCCGGAGCCAGA  
AGTCTATTTGGGCCTGGACCCAGATGGCGCCCTTAAGGTCTGAACCAAACGAGACAGAAAGTCCAGCCC  
AGTTTTTTAGATCCTTTTCGTTACCCCCGGCCCTGTTAGAGCCTGGGCCCATGGACAACCTTCTTATCGGA  
CTGCTACCCTACTTTTGGGTCGCCGGCCACCTCCGAGTCCAACCTATTTTCCGGTCACCGTGCTCAACAT  
ACAAACATCAGAATCGGACCTAAACGGGTCAATATCGGGTCCGAACCTCGGTATCCAATTCCCCCGTGGG  
ATGTGACTTCGAGTTCCCCATTGATCAGCTACTAGATATTGAGGCAGATTTTCCTAATTTTGAGTTTTAA

>*HuWRKY39*

ATGGAGGGCCTTGAGGAAGTTAACAAAGCTGCTGTGGCGAGTTGTCATAGAGTTTTGAGTATCATATCT  
CAACCTCAAGAGCATACCCGGTTTAGGAGTTTAGCTGTTGAGACTGAACAAGCTGTGACTAAGATAAA  
GACAGTTGTCTCTCTACTTAGTAATGGTAATGGATTAGGTCATGCAAGGGCTAGGATTGTGAAGAGAAT  
TAGGAACAACCCTTTTCTCAAAGTATTTTCTTAGAGAGCCCAAGTAACCCTAAGGCTGATCAGAATCA  
ACCGGTAAAGGCTATTCAGCTGCTCAAAACCAACTTGAATGAGTGCCATGTTCAAGAGAATGGCTCTG

CAACTGGCAAAAGTTGCTTGTCTTTGGGGGGAGATTTGTCACTGGAAATGAGCTCGAGTGCAAAA  
CCTCTACAACCTTGCTCATCCCACTACAAAAGCACATTATCAGTTTCTTCAGCAACAGCAACTACAGCAG  
CAGAAGCTTCAACAGGAGTTAAACTCCGAGCTGAGATGTTTCATCGAATGAGCAACAGCACGATTAG  
TCTCAATTTTGATAGCTCTAGTTGCACCCCGACAATGTCATCGACTCGGTCTTTCATTTCTTCAGTGAGC  
ATTGATGGAAGTGTGGCTAATTTGGATGGAAATGGGTTC AATTTGATTGGAGGGAGTCCCTCATTGGAC  
CAGAACTTGAGTCAAAGCAGGAAGAGGTGCTTGGGGAGAGGCGAAGAGGGAAGTCTTAAATGCAGT  
AGCAGTGGAAGATGTCATTGCTCAAAAAAGAGGAAGCATAGGGTGAAGAGATCAATCAAGGTTCCCTG  
CTGTCAGTAATAAGCTGGCTGATATCCCTCCAGACGAGTGCTCGTGGAGAAAATACGGGCAGAAAGCCA  
ATCAAGGGTTCGCCTCACCTAGGGGTACTATAAGTGTAGCAGCGTGAGAGGCTGCCCAGCAAGGAA  
GCATGTTGAGAGATGTGTGGAAGATCCTTCAATGCTTATTGTGACATATGAAGGTGAGCACAATCACGC  
TAGCGTA **CCTTCACAATCCACAACTCGTGA**

>*HmoWRKY39*

ATGGAGGGCCTTGAGGAAGTTAACAAAGCTGCTGTGGCGAGTTGTCATAGAGTTTTGAGTATCATATCT  
CAACCTCAAGAGCATACCCGGTTTAGGAGTTTAGCTGTTGAGACTGAACAAGCTGTGACTAAGATAAA  
GACAGTTGTCTCTCTACTTAGTAATGGTAATGGATTAGGTCATGCAAGGGCTAGGATTGTGAAGAGAAT  
TAGGAACAACCCTTTTCTCAAAGTATTTTCTTAGAGAGCCCAAGTAACCCTAAGGCTGATCAGAATCA  
ACCGGTAAAGGCTATTCAGCTGCTCAAAACCAACTTGAATGAGTGCCATGTTCAAGAGAATGGCTCTG  
CAACTGGCAAAAGTTGCTTGTCTTTGGGGGGAGATTTGTCACTGGAAATGAGCTCGAGTGCAAAA  
CCTCTACAACCTTGCTCATCCCACTACAAAAGCACATTATCAGTTTCTTCAGCAACAGCAACTACAGCAG  
CAGAAGCTTCAACAGGAGTTAAACTCCGAGCTGAGATGTTTCATCGAATGAGCAACAGCACGATTAG  
TCTCAATTTTGATAGCTCTAGTTGCACCCCGACAATGTCATCGACTCGGTCTTTCATTTCTTCAGTGAGC  
ATTGATGGAAGTGTGGCTAATTTGGATGGAAATGGGTTC AATTTGATTGGAGGGAGTCCCTCATTGGAC  
CAGAACTTGAGTCAAAGCAGGAAGAGGTGCTTGGGGAGAGGCGAAGAGGGAAGTCTTAAATGCAGT  
AGCAGTGGAAGATGTCATTGCTCAAAAAAGAGGAAGCATAGGGTGAAGAGATCAATCAAGGTTCCCTG  
CTGTCAGTAATAAGCTGGCTGATATCCCTCCAGACGAGTGCTCGTGGAGAAAATACGGGCAGAAAGCCA  
ATCAAGGGTTCGCCTCACCTAGGGGTACTATAAGTGTAGCAGCGTGAGAGGCTGCCCAGCAAGGAA  
GCATGTTGAGAGATGTGTGGAAGATCCTTCAATGCTTATTGTGACATATGAAGGTGAGCACAATCACGC  
TAGCGTACCTTCACAATCCACAACTCGTGA

>*HuWRKY40*

**ATGGATTATTCAACGTGGTTAAGC**TCAGCTTCATTGGATCTGAGTCGTAGCAATGATCACAATCATGGCA

ATGACAATACGCTCCGGCTTTTCGATGATTCTCCTGTTTCGGGATGGTCTTAAGACTGCCATCAAAGTTGA  
GACGATCCAAACCTGCAGCTCCAATGAAGTTGATCGCCAACCTTTGATCAAAGATGAGGCAGGAGTTC  
TGATGGAAGAGTTGAAGAAGGCAAACGAAGAGAACAGGAGGTAAACCGAAATGTTAACGGTCGTATG  
TGACAATTACAATGATTTGAAGAGGCAGTTGGCGGATTACATGACTAAAGCTGCAAGTAATGAGTTGGT  
GGGCAATGTGGCCAAGAAAAGAAAGATCGAGAATTCCACCAATAGTAATAACAACAACAATAACAACA  
ACAGTAACAAGATTATTGGCAGTAATAATGTCGACAGTGGTTCGAGCGATGAAGAAGATTCGTGTGAG  
AAACCAAAGGAAGAGGCTATTAAAGCCAAGGTCACCAGAGTTGCTGTTTCGAACTGAAGCTTCTGACT  
CCACCCTTATCCTGAAGGATGGATATCAATGGAGGAAATACGGGGCAAAAGGTGACTAGGGATAACCCCT  
GCCCTAGAGCTTACTTCAAGTGCTCCTTCGCGCCTAGTTGTCCGGTTAAAAAGAAGGTTCAAAGAAGT  
CTAGAAGACCAATCAATGCTAGTTGCAACCTACGAAGGGGAGCACAACCATGCACCTCCATCCCAACA  
GGAGCCAGCACTGGGCCCCAAACCGGTCCTTCAGCCTCGGCTCCGTCGCATGTAACGCGACCCTAGCCT  
CATCCGGACCCACAGTCACTCTTGACCTAACCAAGCCCCAAGCCTAGCACTGCTAAAAATGACACAACCT  
CCAAAAACATTAAGCAGCAATAACGTCAGTTCTGCCCAACTGTTGAAATTCAACTCCCCTGAATTTAG  
AAGCTTTTGGCAGAACAAATGGCTTCTTCTTTGACAAAAGATCCCAACTTCACAGCTGCTCTTGCTGCT  
GCCATTTCTGGGAGATCTGCACAAACCTCAACTGATTAA

>HmoWRKY40

ATGGATTATTCAACGTGGTTAAGCTCAGCTTCATTGGATCTGAGTCGTAGCAATGATCACAATCATGGCA  
ATGACAATACGCTCCGGCTTTTCGATGATTCTCCTGTTTCGGGATGGTCTTAAGACTGCCATCAAAGTTGA  
GACGATCCAAACCTGCAGCTCCAATGAAGTTGATCGCCAACCTTTGATCAAAGATGAGGCAGGAGTTC  
TGATGGAAGAGTTGAAGAAGGCAAACGAAGAGAACAGGAGGTAAACCGAAATGTTAACGGTCGTATG  
TGACAATTACAATGATTTGAAGAGGCAGTTGGCGGATTACATGACTAAAGCTGCAAGTAATGAGTTGGT  
GGGCAATGTGGCCAAGAAAAGAAAGATCGAGAATTCCACCAATAGTAATAACAACAACAATAACAACA  
ACAGTAACAAGATTATTGGCAGTAATAATGTCGACAGTGGTTCGAGCGATGAAGAAGATTCGTGTGAG  
AAACCAAAGGAAGAGGCTATTAAAGCCAAGGTCACCAGAGTTGCTGTTTCGAACTGAAGCTTCTGACT  
CCACCCTTATCCTGAAGGATGGATATCAATGGAGGAAATACGGGGCAAAAGGTGACTAGGGATAACCCCT  
GCCCTAGAGCTTACTTCAAGTGCTCCTTCGCGCCTAGTTGTCCGGTTAAAAAGAAGGTTCAAAGAAGT  
CTAGAAGACCAATCAATGCTAGTTGCAACCTACGAAGGGGAGCACAACCATGCACCTCCATCCCAACA  
GGAGCCAGCACTGGGCCCCAAACCGGTCCTTCAGCCTCGGCTCCGTCGCATGTAACGCGACCCTAGCCT  
CATCCGGACCCACAGTCACTCTTGACCTAACCAAGCCCCAAGCCTAGCACTGCTAAAAATGACACAACCT  
CCAAAAACATTAAGCAGCAATAACGTCAGTTCTGCCCAACTGTTGAAATTCAACTCCCCTGAATTTAG

AAGCTTTTGGCAGAACAAATGGCTTCTTCTTTGACAAAAGATCCCAACTTCACAGCTGCTCTTGCTGCT  
GCCATTTCTGGGAGATCTGCACAAACCTCAACTGATTAA

>*HuWRKY41*

ATGGAGTTCAATGGCAACAGTAGTAGCTGTGAGCAAGGCTCCTTGGCCAGGGAGCTAATCAAGGGAAT  
GGAGCTAACTAGACAGCTAAAAGCTCATATGGGTCTAGAAGTTTCTGATGAAGCTAAAGGAATACTAGT  
GGAAGCGATACTGTCTTCCTATGAGAAGGCCCTTTCACTTCTGAACTTGGGTGGATCAATGGAACAGTC  
TCAGCAGCATGTGGTTCCATCCACGAATGTGCCTGGATCACCCATTTCCGTCATTGGAAGTCCTAAGAG  
CGAGGATCAGAACCCGGGTTTTAATGCTCAACAGGAAGCTATGGATTTCCAAGGAAGAGAAAGATGA  
TGACAACTTGGACAGAGCAGGTGAAAGCGAGCCCAGACAACAGGCTGGAAGCACCTCCTGATGACG  
GTTATAGTTGGAGAAAGTACGGCCAGAAGGATATCTTGGGAGCCAAACATCCAAGAAGCTATTACAGAT  
GCACATACCGCAACCTTCAAGGATGTTGTGCGATCAAGCAAGTGCAGCGAAATGATGAAGACCCCTCA  
GTATTTGACATCACCTACAAAGGCAGGCATACTTGTACACCAGTTCAGCGTTCCAAGTCTGCACCAACA  
TCACCAGAAAAACATGAGGGGAACAAACATCATGATCATCCCATGATGCAGCAACAGCCGAATGTGCT  
GCTGAATTTTCAGAGAGGACTAAGTGTTGACATACAAAACGTAGAAAGTAAAGGAGCAGGGTATCCCC  
TCTCCACAAGGGAATATGGGTACGAAAACCATACATTTACACCATCAATAATGAATGACAATAACTTCTT  
TAGCAATTATTCACCATCCTTCATACCATCACCAGCCAACTCCACATCAAATTACTTCTCGAGATCACCC  
TGCAATGTGAGCACCTTTGGAGGAGTTCACAGTGGACAACATTATGAATCGGACATTGCAGAGATGATT  
TCAGCTGCTTCTTCTGGAACCAATTACCCCATCATTGGCATAGATTCCCCACTTCAGCAATTGGGAATCA  
ACCCCTGTTTCCCATTTGATAATCAAGTGTTTTTCCCAGCTTCTCTCAGCCTAAGGAATAG

>*HmoWRKY41*

ATGGAGTTCAATGGCAACAGTAGTAGCTGTGAGCAAGGCTCCTTGGCCAGGGAGCTAATCAAGGGAAT  
GGAGCTAACTAGACAGCTAAAAGCTCATATGGGTCTAGAAGTTTCTGATGAAGCTAAAGGAATACTAGT  
GGAAGCGATACTGTCTTCCTATGAGAAGGCCCTTTCACTTCTGAACTTGGGTGGATCAATGGAACAGTC  
TCAGCAGCATGTGGTTCCATCCACGAATGTGCCTGGATCACCCATTTCCGTCATTGGAAGTCCTAAGAG  
CGAGGATCAGAACCCGGGTTTTAATGCTCAACAGGAAGCTATGGATTTCCAAGGAAGAGAAAGATGA  
TGACAACTTGGACAGAGCAGGTGAAAGCGAGCCCAGACAACGGGCTGGAAGCACCTCCTGATGACG  
GTTATAGTTGGAGAAAGTACGGCCAGAAGGATATCTTGGGAGCCAAACATCCAAGAAGCTATTACAGAT  
GCACATACCGCAACCTTCAAGGATGTTGTGCGATCAAGCAAGTGCAGCGAAATGATGAAGACCCCTCA  
GTATTTGACATCACCTACAAAGGCAGGCATACTTGTACACCAGTTCAGCGTTCCAAGTCTGCACCAACA  
TCACCAGAAAAACATGAGGGGAACAAACATCATGATCATCCCATGATGCAGCAACAGCCGAATGTGCT

GCTGAATTTTCAGAGAGGACTAAGTGTTGACATACAAAACGTAGAAAGTAAAGGAGCAGGGTATCCCC  
TCTCCACAAGGGAATATGGGTACGAAAACCATACATTTACACCATCAATAATGAATGACAATAACTTCTT  
TAGCAATTATTCACCATCCTTCATACCATCACCAGCCAACTCCACATCAAATTACTTCTCGAGATCACCC  
TGCAATGTGAGCACCTTTGGAGGAGTTCACAGTGGACAACATTATGAATCGGACATTGCAGAGATGATT  
TCAGCTGCTTCTTCTGGAACCAATTACCCCATCATTGGCATAGATTCCCCACTTCAGCAATTGGGAATCA  
ACCCCTGTTTCCCATTGATAATCAAGTGTTTTTCCCAGCTTCTCTCAGCCTAAGGAATAG

>HuWRKY42

ATGGAGATTGAGATTTTGAAGAACCTAGAATTTTCCAATGGAACATGAAGAAAATCAAAAGCATGT  
GCTCAAGGAAATGGACTTCTTCCAAGGCTCTACTTGTTCTAAGGAGGTTTCATACCAAACATGGCGATCG  
AGATGGAGATGATGAACAAATCGATACTGGGTGAATCTTCACATGAGTGGAAATATGGATGCTCTTCA  
GAAGTCTACGATTGAAGACGAAGTATCATGGAAAGCATCGGAGGATAATAATCAAATTACCAAGAACA  
AGTTGGTAGCCCTAAGGGACGAGATAGCAAGGAAAAACGTGGAAAATCAAAGATTGAAGACTCTACTT  
AACCAAGTGATTAGCAGCTACCAAGCCCTGCAAAAGCAAATCTCCACAATTAGACAGCATCAACTTGA  
TCAAAACAAAGACAAAGGAGCCCTCCAAACACAGATAGTGAAGGATGACGAGATGACCCAAAAACG  
CAAAATGAGACAAGTCTTGAATCTTGGGCAAGCTACCATCAATACGAATGGAGATAATCAAGAGGAGC  
TTAACCCCTAATTTTCTTGATCATGACAATTACAGTAATGACGAGCACCTAAATAAGAGTGGCGCAAGAG  
ATGATCATAGTTCAAACATGGCTAATAAGGAGGCCATGTTATTAGCAGCAAAAAAATCAATATCGAGCA  
ATAATACTAACATGGCAAGAGTTGGCATGGGAGCTTCAATGCCAAAGGCAGAGCAGAGCCACGAAGTA  
ACGATGAGACAAGCTCGTGTGTCAGTCCGAGCACGATCTGAAGCATCTATGATAAGCGATGGATGCCAA  
TGGAGAAAGTATGGGCAAAAAATGGCCAAAGGAAATCCATTCCCTCGAGCTTACTATCGTTGCACCATC  
GGCACTTCTTGTCCCGTCCGCAAACAGGTTCAAAGATGTGCGGAAGATAGAAGTATTCTCATAACAAC  
TACGAAGGGCAACACAACCATCCATTGCCAACAGCGGCTATGACCATGGCCGCCACCACATCAGCTGC  
TGCCTCAATGCTCGTGACGGGCTCAATGTCCAACCAGGTGGATGGGTCAATGAACCCGCCCGTCTTCTC  
CCAGACCGCAACCCTCCCGGGCCTACCGAGCCTCGCCACGATCTCAGCCTCAGCCCCATTCCCAACTAT  
CACATTGGACCTCACCAGGCCACAGCCACAGGGCAACCCTAACAATAATGGGCTGGGCCTGGTGAGCC  
CGCTACAGCAGATCTTCAGTGGGCCCAACAAAGAGAATGGTAATAGCAATCTGCCTTATTTGGGGGAG  
CCGGTGAGTGTTGCTAGAGCAGCCCTGGCTGCTGACCCACCCCTTGCTGCAGCCCTAGCAACTGCTATT  
TCTTCCATGATTAGTAATAATAAGGGGAACAATGTCAATGTAGAATCCCATAGTAACAATGGTGGTGAAA  
GGGTTGTGAGTGGA AAAAATGCCAAGGATAATCTCAACTTGTCAATTCTGTAG

>HmoWRKY42

ATGGAGATTGAGATTTTGGGAAGAACCTAGAAATTTTCCAATGGAACATGAAGAAAATCAAAAGCATGT  
GCTCAAGGAATTGGACTTCTTCCAAGGCTCTACTTGTTCTAAGGAGGTTTCATACCAAACATGGCGATCG  
AGATGGAGATGATGAACAAATCGATACTGGGTTGAATCTTCACATGAGTGGAAATATGGATGTTCTTCA  
GAAGTCTACGATTGAAGACGAAGTATCATGGAAAGCATCGGAGGATAATAATCAAATTACCAAGAACA  
AGTTGGTAGCCCTAAGGGACGAGATAGCAAGGAAAAGCGTGGAAAATCAAAGATTGAAGACTTTACTT  
AACCAAGTGATTAGCAGCTACCAAGCCCTGCAAAAGCAAATCTCCACAATTAGACAGCATCAACTTGA  
TCAAAACAAAGACAAAGGAGCCCTCCAAACACAGATAGTGAAGGATGACGAGATGACCCAAAAACG  
CAAATGAGACAAGTCTTGAATCTTGGGCAAGCTACCATCAATACGAATGGAGATAATCAAGAGGAGC  
TTAACCCCTAATTTCTTGATCATGACAATTACAGTAATGACGAGCACCTGAATAAGAGTGGTGCAAGAG  
ATGATCATAGTTCAAACATGGCTAATAAGGAGGCCATGTTATTGGCAGCAAAAAAATCAATATCGAGCA  
ATAATACTAACATGGCAAGAGTTGGCATGGGAGCTTCAATGCCAAAGGCAGAGCAGAGCCACGAAGTA  
ACGATGAGACAAGCTCGTGTGTCAGTCCGAGCACGATCTGAAGCATCCATGATAAGCGATGGATGCCA  
ATGGAGAAAGTATGGGCAAAAAATGGCCAAAGGAAATCCATTCCCTCGAGCTTACTATCGTTGCACCAT  
CGGCACTTCTTGTCCCGTCCGCAAACAGGTTCAAAGATGTGCGGAAGATAGAAGTATTCTCATAACAA  
CTTACGAAGGGCAACACAACCATCCATTGCCAACAGCGGCTATAACCATGGCCGCCACCACATCAGCT  
GCTGCCTCAATGCTCGTGACGGGCTCAATGTCCAACCAGGTGGATGGGTCAATGAACCCGCCCGTCTT  
CTCCCAGACCGCAACCCCTCCCGGGCCTACCAAGCCTCGCCACGATCTCAGCCTCAGCCCCATTCCCAA  
CTATCACATTGGACCTCACCAGGCCACAGCCGCAGGGCAACCCTAACAATAATGGGCTGGGCCTGGTA  
AGCCCGCTACAGCAGATCTTCAGTGGGCCCAACAAAGAGAATGGTAATAGCAATCTGCCTTATTTGGGG  
GAGCCGGTGAGTGTTGCTAGAGCAGCCCTGGCTGCTGACCCACCCCT  
TGCTGCAGCCCTAGCAACTGCTATTTCTTCCATGATTAGTAATAATAAGGGGAACAATGTCAATGTAGAA  
TCCCATAGTAACAATGGTGGTGAAAGGGTTGTGAGTGGAAAAAATGCCAAGGATAATCTCAACTTGTC  
AATTCTGTAG

>HuWRKY43

ATGAAGAAGAAGGGGCAAAAGAGAGTAAGGCAACCGCGATTTGCATTCATGACAAAAAGTGAAGTTG  
ATCATCTTGAAGACGGATATAGATGGCGAAAATATGGTCAGAAAGCTGTTAAAAACAGCCCATTTCCCA  
GGAGCTATTATAGATGCACAAACAGCAAGTGCACAGTGAAGAAAAGGGTGGAACGGTCTCCTCAGAAGA  
TCCAACGGTTGTGATCACCACCTATGAGGGTCAGCACTGTCATCACACCGTTGGATTCCAAAGAAGCA  
CTGGATTCAATTGGTCATGAAGGCCCTTTCCTAGGGCAGTTTCCTCCTCAGTTAGCCCCCAGTACTTCTA  
CCCGCCACCACCACCTGGTATGCAGTTTTCTCCCCGCGATGATTCAACTAGTACTATTAATGTACAAGCT

TCTGCTACTTCTTCTTTCCAATCTTATCAAGAATCCCCCATGAAGTGGAAGAATCGCCACCAATGATTC  
CTCAGCAATCAAGCCAACAACCGCCACCACCACCACCTCCTACCGATGAAGGATTGCTTGGGGATATC  
GTGCCTCCAGGGATGCGAAACCTATGA

>*HmoWRKY43*

ATGAAGAAGAAGGGGCAAAAGAGAGTAAGGCAACCGCGATTTGCATTCATGACAAAAAGTGAAGTTG  
ATCATCTTGAAGACGGATATAGATGGCGAAAATATGGTCAGAAAGCTGTTAAAAACAGCCCATTTCCTCA  
GGAGCTATTATAGATGCACAAACAGCAAGTGCACAGTGAAGAAAAGGGTGGAAACGGTCTCAGAAGA  
TCCAACGGTTGTGATCACCACCTATGAGGGTCAGCACTGTCATCACACCGTTGGATTCCAAAGAAGCA  
CTGGATTCATTGGTCATGAAGGCCCTTTCCTAGGGCAGTTTCCTCCTCAGTTAGCCCCCAGTACTTCTA  
CCCGCCACCACCACCTGGTATGCAGTTTTCTCCCCGCGATGATTCAACTAGTACTATTAATGTACAAGCT  
TCTGCTACTTCTTCTTTCCAATCTTATCAAGAATCCCCCATGAAGTGGAAGAATCGCCACCAATGATTC  
CTCAGCGATCAAGCCAACAACCGCCACCACCACCACCTCCTACCGATGAAGGATTGCTTGGGGATATC  
GTGCCTCCAGGGATGCGAAACCTATGA

>*HuWRKY44*

ATGTTGTATTTGTTCAAGGATGGAGTTGAAAGACATAGATAGAGTAATCATAGCAAAGCCAGTAGCTTCA  
AGGCCTATTTGCACTGGGTTTAGATCCTTCTCTGAGCTCCTTGCTGGTGCCATCGATGCCTCACCATCAT  
CAGCTAATCTGTGCTCTGAAATGGCAGTTGCTGCGATTAGGCCTAAGACAATAAGGGTTAAGCCTGCAG  
TGAATCACAGCATAGTTTCTCAGGATGAGGCTTCGAGGGCAGCTTCCGTGTCTGACAAGTTTGCAAGA  
TCAGAAAATCATTCCACTATGGTATTCAAGCCGTTGGCAAAAGTGGTCTCCCGGGCTACTGTTTCTCTG  
TTGGCAAGTATGGGGGATCTCAACATCACTCATCCACAGGCAGCAACACAGGTTGACGTGGGTGATCA  
GCATCTGACTCAACACAAGCTTTTTTCAGGTCTCGAATCCATGTCCAAGTAATCCACCCCAGGCTGAACC  
ATCCCAAGTAGTTGATCCTCCTAAGATGGCACAGCAGATGCTTGATGAAGAACCTAAGATGATAGCGCC  
TTCTGCAGCTAATGTTGATCGGCCCTTATGATGGATATAATTGGAGAAAATATGGGCAAAAACAAGTC  
AAGGGAAGTGAGTATCCAAGAAGTTATTATAAGTGCACAAATCCAAGTTGCCCTGTAAAGAAAAAAGT  
CGAGAGATCCTTTGATGGGCAGATAGCAGAAATTGTATATAAGGGGGAGCATAACCATCCAAAGCCACA  
CCCTCCCAAGCGCAACTTATCTGATGGGATTGGACAAGGTCTTCATAGCACGGAACCCAAGTTGCACG  
AAAGTAGTACTTGTGCAAGAAATGAAGGGTTCGAAGGACGGATAGAGAGTCAAGTTGGAGTGGGATT  
TTCTAACCCATCAACGGTTCCTGAGAAGGCTTCGGTTTTATGTCATCATCGGACTAAAATACGAAAGCAT  
AATGATGGTTGTGCAACTCCTGAGGACTCATTGAAGGGTGATGATAATGTACATAAGAGCAAGAGAAG  
GAAAATTGATGAACACAATGAAGCAGGAACATCAAAGGAAGGGATACAAGAACCACGTATTTGGGTG

CAAAACAACACAGAGCCTGAAATTTAGGGGATGGCTTTTCGCTGGAGGAAATATGGACAGAAGGTTG  
TTAAGGGAAACCCATACCCAGAAAGCTATTACCGGTGCACTGGCCTGAAATGCAATGTTTCGCAAGCATG  
TAGAAAGAACATCAGATGATCCAGCTGCTTTCATCACTACATACGAAGGAAGGCACAACCATGAAATTC  
CAATGAAGAACACAAAGAATACAACCTCCCCTGAGCCAGAGTCTCAAGCACTTACTTCCAAAGAGAA  
ATAG

>*HmoWRKY44*

ATGTTGTATTTGTTTCAGGATGGAGTTGAAAGACATAGATAGAGTAATCATAGCAAAGCCAGTAGCTTCA  
AGGCCTATTTGCACTGGGTTTAGATCCTTCTCTGAGCTCCTTGCTGGTGCCATCGATGCCTCACCATCAT  
CAGCTAATCTGTGCTCTGAAATGGCAGTTGCTGCGATTAGGCCTAAGACAATAAGGGTTAAGCCTGCAG  
TGAATCACAGCATAGTTTCTCAGGATGAGGCTTCGAGGGCAGCTTCCGTGTCTGACAAGTTTGCAAGA  
TCAGAAAATCATTCCACTATGGTATTCAAGCCGTTGGCAAAAGTGGTCTCCCGGGCTACTGTTTCTCTG  
TTGGCAAGTATGGGGGATCTCAACATCACTCATCCACAGGCAGCAACACAGGTTGACGTGGGTGATCA  
GCATCTGACTCAACACAAGCTTTTTTCAGGTCTCGAATCCATGTCCAAGTAATCCACCCCAGGCTGAACC  
ATCCCAAGTAGTTGATCCTCCTAAGATGGCACAGCAGATGCTTGATGAAGAACCTAAGATGATAGCGCC  
TTCTGCAGCTAATGTTGATCGGCCCTCTTATGATGGATATAATTGGAGAAAATATGGGCAAAAACAAGTC  
AAGGGAAGTGAGTATCCAAGAAGTTATTATAAGTGCACAAATCCAAGTTGCCCTGTAAAGAAAAAAGT  
CGAGAGATCCTTTGATGGGCAGATAGCAGAAATTGTATATAAGGGGGAGCATAACCATCCAAAGCCACA  
CCCTCCCAAGCGCAACTTATCTGATGGGATTGGACAAGGTCTTCATAGCACGGAACCCAAGTTGCACG  
AAAGTAGTACTTGTGCAAGAAATGAAGGGTTCGAAGGACGGATAGAGAGTCAAGTTGGAGTGGGATT  
TTCTAACCCATCAACGGTTCCTGAGAAGGCTTCGGTTTTATGTCATCATCGGACTAAAATACGAAAGCAT  
AATGATGGTTGTGCAACTCCTGAGGACTCATTGAAGGGTGATGATAATGTACATAAGAGCAAGAGAAG  
GAAAATTGATGAACACAATGAAGCAGGAACATCAAAGGAAGGGATACAAGAACCACGTATTTGGGTG  
CAAAACAACACAGAGCCTGAAATTTAGGGGATGGCTTTTCGCTGGAGGAAATATGGACAGAAGGTTG  
TTAAGGGAAACCCATACCCAGAAAGCTATTACCGGTGCACTGGCCTGAAATGCAATGTTTCGCAAGCATG  
TAGAAAGAACATCAGATGATCCAGCTGCTTTCATCACTACATACGAAGGAAGGCACAACCATGAAATTC  
CAATGAAGAACACAAAGAATACAACCTCCCCTGAGCCAGAGTCTCAAGCACTTACTTCCAAAGAGAA  
ATAG

>*HuWRKY45*

ATGGTTGCAAAGGAGGAAGGCCAAGTGATTGTAGCTTCTAAAGATAACTCACTGCAGACGCCAAGTCC  
TGATTCCATTGTGCATGTTTGCTATACTACCAAGAAGAGAAAAACACCCATTGTCCCAGAGAAACCATT

GGAAGATGGATATAATTGGAGAAAGTATGGGCAAAAAAATGTCAAAGGAAATGAATATATAAGAAGCTA  
TTACAAGTGTTTCATACCCAACTGCCAGGTCAAAAAACAAGTGGAGCGCTTGCAGGATGGGCGGATTA  
CAGATATTACTTACCTGGGGAAGCATGACCATCCTAAACCTCACTCTGAAAACCAGGAAGCTGTTTCCT  
CTTTTTTGTCAAGTCAAGCACGGATAACAGATTGTCCTTCATCAACTGTTGAAGAAGATAAGTCATCCA  
AAGTGCATGCCCCCGCAAATGATCATTTCATCTTCAGCGAATGGATGTGTGTGAGCGTCCAATGGTTG  
ACGAGCATGGTAGTACGACACCTTCTCTTGCAGAACTGATCAAACAAGAGATGTTTCATGATGAAAAT  
GTGGTCCCAAAGAAACGGAAGAAAAGCATTGACAGTGCTGATATCATGTCAGAAAAACCTGCCCATGA  
ATCACGTCTTGTTGTCCATACAGTTAGTGAGGTTGATATTGTCAATGATGGGTACAGGTGGCGCAAATAT  
GGACAGAAAATGGTTAAAGGCAATCCTAATCCAAGGAGCTACTATAGGTGTTCTACTGCTGGATGCCCCG  
GTTAAGAAACATGTCGAGAGAGCCTCTTATGATCCACAAGTTGTCATTACCACATATGAGGGTCAACAT  
GATCACAGTATACCTCCCATTAGGACTGTTGAACCCCAGAATGAATCACCATCTGGTGGCAGGATGGAA  
TTGAATGATGTCAGTAAATCCAGGTTGCAAGAGTATGATGGTGCTCAGAATGGTTCAACAATATGTGAA  
GCAGAGAAAATGGATGGCATTGGCGCCACATCCAAAAAAGAAATCAATACCAAAGATGCGGTCAAGAT  
GGAGCCTGAACTTCACCTAGTGAGCAAAAGATGCAGCCTGGAGCCAGAAGCAATCTAATTGAGCAA  
AGGAAGCGTAGAGTTACTAGTAGTGATACACAAATGCAGGATGGTCTCATTGCGCTGCTTCAAGTTCT  
GATAATATTGATCATCAAAGTATCAAGCAAGAAAAAGTGGCCACGGATGAAGAAATGAAGACTGAGGT  
GGTACCAACTGACAAACAGATAAAAACTGACAAGTCTCATCTTGAAACAAAATCAAACAAGGTCAAG  
CAAGAAAAAGTGGCCACTGATGAAGAAATAATTGATGTTGGTAAGACTCAGGGGGTACCAACTGAGC  
AACAGAGGCCTGACGCACGAGCTGACCTGTCTCATCCTGAAACAAAATCAAACGAGGTCAAGCTAGA  
AAAAGGGGCCACTGATGAAGAAATGAAGACTGAGGTTGGTGAGACTCAGGTGGTACGAATTGATGTT  
GGTAAGACTCGGGGTACCAACTGA

>HmoWRKY45

ATGGTTGCAAAGGAGGAAGGCCAAGTGATTGTAGCTTCTAAAGATAACTCACTGCAGACGCCAAGTCC  
TGATTCCATTGTGCATGTTTGCTATACTACCAAGAAGAGAAAAACACCCATTGTCCCAGAGAAACCATT  
GGAAGATGGATATAATTGGAGAAAGTATGGGCAAAAAAATGTCAAAGGAAATGAATATATAAGAAGCTA  
TTACAAGTGTTTCATACCCAACTGCCAGGTCAAAAAACAAGTGGAGCGCTTGCAGGATGGGCGGATTA  
CAGATATTACTTACCTGGGGAAGCATGACCATCCTAAACCTCACTCTGAAAACCAGGAAGCTGTTTCCT  
CTTTTTTGTCAAGTCAAGCACGGATAACAGATTGTCCTTCATCAACTGTTGAAGAAGATAAGTCATCCA  
AAGTGCATGCCCCCGCAAATGATCATTTCATCTTCAGCGAATGGATGTGTGTGAGCGTCCAATGGTTG  
ACGAGCATGGTAGTACGACACCTTCTCTTGCAGAACTGATCAAACAAGAGATGTTTCATGATGAAAAT

GTGGTCCCAAAGAAACGGAAGAAAAGCATTGACAGTGCTGATATCATGTCAGAAAAACCTGCCCATGA  
ATCACGTCTTGTGTCCATACAGTTAGTGAGGTTGATATTGTCAATGATGGGTACAGGTGGCGCAAATAT  
GGACAGAAAATGGTTAAAGGCAATCCTAATCCAAGGAGCTACTATAGGTGTTCTACTGCTGGATGCCCCG  
GTTAAGAAACATGTCGAGAGAGCCTCTTATGATCCACAAGTTGTCATTACCACATATGAGGGTCAACAT  
GATCACAGTATACCTCCCATTAGGACTGTTGAACCCCAGAATGAATCACCATCTGGTGGCAGGATGGAA  
TTGAATGATGTCAGTAAATCCAGGTTGCAAGAGTATGATGGTGCTCAGAATGGTTCAACAATATGTGAA  
GCAGAGAAAATGGATGGCATTGGCGCCACATCCAAAAAAGAAATCAATACCAAAGATGCGGTCAAGAT  
GGAGCCTGAAACTTCACCTAGTGAGCAAAAGATGCAGCCTGGAGCCAGAAGCAATCTAATTGAGCAA  
AGGAAGCGTAGAGTTACTAGTAGTGATACACAAATGCAGGATGGTCTCATTTGCGCTGCTTCAAGTTCT  
GATAATATTGATCATCAAAGTATCAAGCAAGAAAAAGTGGCCACGGATGAAGAAATGAAGACTGAGGT  
GGTACCAACTGACAAACAGATAAAAACTGACAAGTCTCATCTTGAAACAAAATCAAACAAGGTCAAG  
CAAGAAAAAGTGGCCACTGATGAAGAAATAATTGATGTTGGTAAGACTCAGGGGGTACCAACTGAGC  
AACAGAGGCCTGACGCACGAGCTGACCTGTCTCATCCTGAAACAAAATCAAACGAGGTCAAGCTAGA  
AAAAGGGGCCACTGATGAAGAAATGAAGACTGAGGTTGGTGAGACTCAGGTGGTACGAATTGATGTT  
GGTAAGACTCGGGGTACCAACTGA

>HuWRKY46

ATGGAGAAGATGAAGGGAAGTACTTCAATGGATCAAAGGGCTGTGATGGTCAAGGAGCTAGCTCAGG  
GGCTCGAGCTAGTTAAGCGACTCAGAACGCGACTGTCAGTTAGCTCAACTGATGATGATCAAGCTCTTA  
ACCACTCATTAGTGATAAGATGCTCTCTGTCTTTAACAACCTCAATTTCTTTGGCCAAGTTCAATTTAAC  
TGAGCTTCATAAAGTTCGCACGGAAGCTCGCCGCGTTCTCTGGCTCATAGCTGCCCCGGAAGTGAAGACT  
CCTCTCATGATCTTCGACCGTCTAGAAAAAGGAAGAAGATGCCACCTAGGGTTGAATGGGTCCGGGTT  
AGCCCGGGCGGCTCGGGTTCTGTTCTCGAAGGTCCTCCTGATGATGTTATAGCTGGAGGAAGTACGG  
ACAGAAACAAATCCTCAAAGCTAAGCATCCACGGGGATATTACCGATGCACACATCGTCACACCCAAG  
GATGTTTTGCCAAAAACAGGTCCAAAAATCCGACCAGGACCCATCCATCTACCAAGTCATCTACAGA  
GGCGAGCACACGTGCCCTCAGCAGGCCCATTTGGTCCAGGCCAATGAAAAGCCCAATGAGGCCCAAA  
TCAAAGTCCAACACAGCCACAGCCACAGCCACACTCACAATCACAACCACTCCCAACCCCAACAACA  
ATGCCAACCCGTTGGGTCCAACCAACAAGAAGTCACTTTTCGGCCTGGGCCCAGATGTGGGCTCAAAA  
GTTGATCCTACAGGAATGCAGGATGATGCCTACATTTTCGGGTCTTATCATTAATTCGGCCCCAAAGTG  
AACCAGGAATAGTTCAAGACTGCATGCTGAGCTCCTCCCCTGGGTTTTGGCCACTGGCAGCCTCGGAA  
TACAACTGTTTTCCGATCTCGCCATGCCAGACCAACGCTTTTGGCCTGGGCCTTAACGCGCAGACATCG

CAAGATCTGAATGAGTTGATATCCGGGCCGAGTTCGGTCTCAAATTCACCGATTGTTGGTGACTTTGAG  
TACCCCTTCCACATGATGCCGGATATTGATGTCAACTTCTCTTTTGATT**TGATAATCTCTTACGTCATATG**  
**TAG**

>*HmoWRKY46*

ATGGAGAAGATGAAGGGAAGTACTTCAATGGATCAAAGGGCTGTGATGATCAAGGAGCTAGCTCAGGG  
GCTCGAGCTAGTTAAGCGACTCAGAACGCGACTGTCAGTTAGCTCAACTGGTGATGATCAAGCTCTTA  
ACCACTCATTAGTGGATAAGATGCTCTCTGTCTTTAACAACTCAATTTCTTTGGCCAAGTTCAATTTAAC  
TGAGCTTCATAAAGTTCGCACGGACTCGCCGCGTTCTCTGGCTCATAGCTGCCCCGGAAGTGAAGACT  
CCTCTCATGATCTTCGACCGTCTAGAAAAAGGAAGAAGATGCCACCTAGGATTGAGTGGGTCCGGGTT  
AGCCCGGGCGGCTCGGGTTCCGTTCTCGAAGGTCCTCTTGATGATGGTTATAGCTGGAGGAAGTACGG  
ACAGAAACAAATCCTCAAAGCTAAGCATCCACGGGGATATTACCGATGTACACATCGTCACACCCAAG  
GATGTTTTGCCAAAAAACAGGTCCAAAAATCCGACCAGGACCCATCCATCTACCGAGTCATCTACAGG  
GGCGAGCACACGTGCCCTCAGCAGGCCCATTTGGTCCAGGCCAATGAAAAACCAATGAGTCCCAAAT  
CAAAGTCCAACCACAGCCACAGCCACAGCCACACTCACAATCGCAACCACTCCCAAACCCACAACAA  
TGCCAACCCGTTGGGTCAAACCAACAAGAAGTCACTTTGGGCCTGGCCCTAGATGTGGGCTCAAAAGT  
TGATCCACAGGAATGGAGGATGATGCCTACATTTTCGGGTCCTTATCATTAATTCGGCCCAATGTGAA  
CCAGGACTAGTTCAAGACTGCATGCTGAGCTCCTCCCCTGGGTTTTGGCCACTGGCAGCCTCGGAATA  
CAACTGTTTTCCGATCTCGCCATGCCGGATCAACGCTTTTGGCCTGGGCCTGAACGCGCAGACATCGCA  
ATCCGACCTGAATGAGTTGATATGCGGGCCGAGTTCGGTTTCAAATTCACCGAATGTTGGTGACTTTGA  
GTACCCCTTCCACATGATGCCGGATATTGATGTCAACTTCTCTTTTGATTTTGATAATCTCTTACGTCATAT  
GTAG

>*HuWRKY47*

**ATGGTTAAGGAAATGGACTT**CTTGTCAGGCTCTACTCGTTCATCATCAAATAATCATCATCATGCATCTG  
TTGATGAAAACAACGATCTTGATGATGATGAACATCTTCAGCTACAAGTAGGGACAGGGTTAAATCTTC  
AAACGGGTAGAGATTTGGTTGGTGCTGACAAGTCCATGGTTGACGATGAAGCATTACCAAGAAAATCA  
TACAACAATCTAATTATCAAGGATAAGTTACTATTTCTGAGGGATGAGATTGCAAAGATGACAGTTGAA  
AATCAAAGGTTGAAGACTTTATTGAATCAAGTAACCAACAGCTACCAAGCTCTTCAATTGCAAATCAAA  
ACCATTACACAGCACCAACTTGATCAAAATCAACACGCAAAAGTCCTTCCAAAACAGATGTTCAATAA  
CAAGGAAGCAATGGAAGAAGCTGGCAAAAGCCACCGAATGAGACAATTCTTGGGTCTTGGAGACGCT  
GCTCATCAAGTGAATAGTAGTGATGAAGGAGATGGAGATGGTGAAGAGGAATCGATGCCGAATTCATG

TGATAACTATAGTAATAGTAATGAAGAGCACTCAAATAAGAGTGATGAAAGAGGAGATCATAGTGCAAA  
AATGGCTAGGAAGGAAGCATTACTTGAGAGATCATGGGGATCCAAAAACACAACATCAACTAGTGGTA  
ATATGCAAATGCCAAGAGTGGGTGTGCAAGCTCCAACAGGAGAAGCAGTAGAGCAAAGCCATGAAGC  
AACTATGAGAAGAGCCCGTGTGTCTGTTCGAGCACGATCTGAAGCATCTATGATAAGTGATGGATGTCA  
ATGGAGGAAATACGGGCAGAAAATGGCGAAAGGAAATCCATGCCCACGAGCCTACTACCGTTGTACTA  
TGGGAACTGCATGTCCAGTTCGCAAACAGGTGCAAAGATGTGCAGAAGACCGAAGCATACTCATAACA  
ACTTATGAGGGGCAGCACAACCACCCCTTACCAAACGCAGCAATAACCATGGCCACCACCACATCAGC  
CGCGGCCTCGATGCTCGTATCCGGGTCAATGTCAAGCCCAATGGGCGGGCTGATAAACCCGCCCATATT  
CTCTCAGCCCACAACCCTCCCGGGCCTTCCAAGCCTCGCCACGATCTCAGCCTCGGCCCCCTTCCCTAC  
TATTACATTGGACCTCACTGGGCCCCACCAGCAGCAACAGGGCACCACCAACATGCCACTAGGGAACC  
TTAGTGGGCCGGGCTTGGTAGGCCCAATGCAACAGGCTTGGGCCAGGCCCTGTGTGGAGTTGACTCG  
ACCCAAGTAGGGCCCAATAGGGATGCAATTAGTATGATAAAAGAAGCTCTTACTGAGCCCTCCATTGCT  
ACAGCCCTAGCAGCTGCAATTTTCATCCATCATGAAAGGCAATGTTGATGGTAGTGAAAATGCCAAGGAT  
AAAAATCTTGGCTTGTCAAATTTTGTAGGTAATTAA

>HuWRKY48

ATGGAGGAGATGTTGAAGAAAGAAGATCAGATGAACATGATCAACAACAACAGTAGTAGTAGTAATCA  
TTTCTCTGTTTTTCCAGATCATACTGGTAATGAGGTGATTGGTCATGGGAATATCAACTACAGTTGGGGA  
TGTGAATATGAATACGATGAACATTATGATGAAATTGGTGGAGTTACGGAAAAGGGATTTGGATTTAATT  
ATCTGGGCAGCTTTATGGATATGGTGGGAATCCAAGATTTTCCCCAAAATTCGTTATTCGATTTGTTGTCT  
CTTCCTCCTCCTCCTCCAGTATTATTACCATCTTCAGATCCCCAGAATAAGCAGAATAATAAAGCAAG  
ATTGTAAGGAAGAAGGAGAAGATCAGGAGAGTTGTCAACACGACGCCGTCTAGCTCTACTCCGGCCG  
CCGGAGACTCGTCGGAGGTCGTCAACACAGCGCCCGCGACACCCAACCTCGGTTTCCAACATTTCTTCC  
TCCTCATCCGATGCCGCCATTGATCACCTGACCCAACCTCAAACTCAAGTCCGCATAAGTTCAAAAAT  
CAGTTGAAGGTGGTGAAGAAGAAGAAGCAGAAAAGGGTAAAGGAGCCCAGATTTGCGTTCATGACA  
AGGACCGAGATTGATCATCTTGATGATGGATATCGGTGGCGCAAGTACGGCCAAAAGCCGTCAAGAA  
CAGCCCCCTCCCCAGGAGCTATTACCGTTGCACCACGGCCGCATGTGGGGTGAAGAAGCGAGTAGAGA  
GGTCCTGCGATGATCCACCATCGTGGTCACCACCTATGAGGGCCAGCACACACACCCATGCCCAGTG  
GTGACACGAGGCAGCCTCGGTCTCAGCCTCCTCCACCACCACTCAATCAGCCCACCGCCACCACTTT  
TGGTGATGGAGGTGGTGGTGCATCATCTGCTAGTACTTTCTCTCTCCTCCACTACCACCACCCCCACCA

CCAACTCATCCCAATGAGCACCTACAACGTTCCCAACAATACAATCAACACAGTTGCGCCACCACCTCA  
TTCCTCCATGACCTTCACCTCTAGCTGTGGCGGTGGCAGTGGCGATGGTAGTGGCAGAGGCAGTCCATT  
TTCTCTCTCCTCAGTGCTTATGGCTAATTACCAGTTAAGAGATGATGGGCTACTCCAGGACATAGTGCCA  
TCCGCCCAGGCCAACAA**CGGCAGCACCAACAGTACCTAG**

>*HmoWRKY48*

ATGGAGGAGATGTTGAAGAAAGAAGATCAGATGAACATGATCAGCAACAACAGTAGTAGTAGTAATCA  
TTTCTCTGTTTTTCCAGATCATACTGGTAATGAGGTGATTGGTCATGGGAATATCAACTACAGTTGGGGA  
TGTGAATATGAATACGATGAACATTATGATGAAATTGGTGGAGTTACGGAAAAGGGATTTGGATTTAATT  
ATCTGGGCAGCTTTATGGATATGGTGGGAATCCAAGATTTTCCCCAAAATTCGTTATTCGATTTGTTGTCT  
CTTCCTCCTCCTCCTCCAGTATTATTACCATCTTCAGATCCCCAGAATAAGCAGAATAATAATAAGCAAG  
ATTGTAAGGAAGAAGGAGAAGATCAGGAGAAGGTTGTCAACACGACGCCGTCTAGCTCTACTCCGGC  
CGCCGGAGACTCGTCGGAGGTCGTCAACACAGCGCCCGGACACCCAACTCGGTTTCCAACATTTCTT  
CCTCCTCATCCGATGCCGCCATTGATCACCTGACCCAACTCAAACTCAAGTCCGCATAAGTTCAAAA  
ATCAGTTGAAGGTGGTGAAGAAGAAGAAGCAGAAAAGGGTAAAGGAGCCCAGATTTGCGTTCATGAC  
AAGGACCGAGATTGATCATCTTGATGATGGATATCGGTGGCGCAAGTACGGCC  
AAAAAGCCGTCAAGAACAGCCCCCTTCCCCAGGAGCTATTACCGTTGCACCACGGCCGCATGTGGGGTG  
AAGAAGCGAGTAGAGAGGTCCTGCGATGATCCCACCATCGTGGTCACCACCTATGAGGGCCAGCACAC  
ACACCCATGCCCAGTGGTGACACGAGGCAGCCTCGGTCTCAGCCTCCTCCCACCACTACTCAATCAGC  
CCACCGCCAACACTTTTGGTGATGGAGGTGGCGGTGCATCATCTGCTAGTACTTTCTCTCTCCTCCACT  
ACCACCACCCCCACCACCAACTCATCCCAATGAGCACCTACAACGTTCCCAACAATACAATCAACACA  
GTTGCGCCACCACCTCATTCTCCATGACCTTCACCTCTAGCTGTGGCGGTGGCAGTGGCGATGGTAGT  
GGCAGAGGCAGTCCATTTTCTCTCTCCTCAGTGCTTATGGCTAATTACCAGTTAAGAGATGATGGGCTAC  
TCCAGGACATAGTGCCATCCGCCCAGGCCAACAAACGGCAGCACCAACAGTACCTAG

>*HuWRKY49*

**ATGAACATAGAGAACAAGAAGCTTAC**ACAAACGTTGACACGAATGTGTCAGAATTACGATCTTTTACA  
AAGTACGCTGATTGATTTGTTTAGTCAAACACCAAAAAAGGACAACGGTGATCATGAGAATCCTAAGA  
AGAGGAAGGCTTGTTTTGAGGCTATGGATTGTCATCAAAGTCAGAGAAACTCAGAACACAGTTGCATC  
ATCAGCTATGAAGAGTCCTTGAAAGAAGCTAGGCTGCTAAATTGCAAGCCTAAAGTATCCACGATCTTG  
ATCCGAACCGAAAAGTATGATACAAAACCTGGTTGTGAAGGATGGATATCAATGGAGAAAATATGGGCA  
AAAGACTACAACGAATAACCCATATCCAAGAGCTTACTTCAAATGTGCCAGTGCCCCCTATTTGTCTCGT

GAAAAAGAAGGTATACGTTTTATTTTCTTAG

>*HmoWRKY49*

ATGAACATAGAGAACAAGAAGCTTACACAAACGTTGACACGAATGTGTCAGAATTACGATCTTTTACA  
AAGTACGCTGATTGATTTGTTTAGTCAAACACCAAAAAAGGACAACGGTGATCATGAGAATCCTAAGA  
AGAGGAAGGCTTGTTTTGAGGCTATGGATTGTCATCAAAGTCAGAGAACTCAGAACACAGTTGCATC  
ATCAGCTATGAAGAGTCCTTGAAAGAAGCTAGGCTGCTAAATTGCAAGCCTAAAGTATCCACGATCTTG  
ATCCGAACCGAAAAAGTATGATACAAAAGTGGTTGTGAAGGATGGATATCAATGGAGAAAATATGGGCA  
AAAGACTACAACGAATAACCCATATCCAAGAGCTTACTTCAAATGTGCCAGTGCCCCCTATTTGTCTCGT  
GAAAAAGAAGGTATACGTTTTATTTTCTTAG

>*HuWRKY50*

ATGACAACAACATCGACTACTACTACCACCACCACCACCCTTTCAGCTCCTTGAGTCATCGGGAAG  
CGATCAGCATATAGATCTGGGCCTGGACTTTGAACTCTCAGATTTCTTGTCTCTTGAGAATTGGGCAATG  
GTGGAGTCAGGATCTATGGGTTTTGGTCAAAATCAAAGTCTTGGGTGCCAAGGAAGTACAGTTTGTGA  
GGTTGGAGGAACCAGCAATATCCAAAATGAGGGAGCGAATAGCATGGGGAGCTACATGGACCCAAAA  
GGAGCTAGGGAAAGGGTCGCGTTCAGGATGAAGTCAGAGGCCGATGTAGTAGAAGACGGATATAAATG  
GCGAAAATATGGGAAGAAGATGGTCAAGAATAGCCCCAACCCAGGAATTACTACAAGTGTTTCGGTAG  
ACAATTGTCCTGTTAAGAAGAGAGTTGAACGTGATAGGGAAGATCCAACATATGTAATAACAACATATG  
AAGGGCACCATAACCATGAAGCCCCTAAGAAGCAATGA

>*HmoWRKY50*

ATGACAACAACATCGACTACTACTACCACCACCACCACCCTTTCAGCTCCTTGAGTCATCGGGAAG  
CGATCAGCATATAGATCTGGGCCTGGACTTTGAACTCTCAGATTTCTTGTCTCTTGAGAATTGGGCAATG  
GTGGAGTCAGGATCTATGGGTTTTGGTCAAAATCAAAGTCTTGGGTGCCAAGGAAGTACAGTTTGTGA  
GGTTGGAGGAACCAGCAATATCCAAAATGAGGGAGCGAATAGCATGGGGAGCTACATGGACCCAAAA  
GGAGCTAGGGAAAGGGTCGCGTTCAGGATGAAGTCAGAGGCCGATGTAGTAGAAGACGGATATAAATG  
GCGAAAATATGGGAAGAAGATGGTCAAGAATAGCCCCAACCCAGGAATTACTACAAGTGTTTCGGTAG  
ACAATTGTCCTGTTAAGAAGAGAGTTGAACGTGATAGGGAAGATCCAACATATGTAATAACAACATATG  
AAGGGCACCATAACCATGAAGCCCCTAAGAAGCAATGA

>*HuWRKY51*

ATGGAGCAGTTGGTGCACCTCTTATCCAGCAGCACCAGAATAATGACAATCATCATGATCATCATGAG  
AATCATGGAAGCTCAAGTAGAGTGGGTGATGAAGCAGAGTGCAGAGAAGTGACTGAAGCCACAGTTT

CCAAGTTCAAGCGGCTAATCTCTGTCCTCAATCGTACTGGCCATGCCCATTTCGCCGGGGGCCATCTA  
ACCCTAACCCTAATCTTTCTCTTTCTCTTCATCTTCCTCCTCTGGGTCTCCGCAGCCGAATCTGGTGCTT  
GCTCCCGAGCCGCCCCAGAAGCCGGTCATGGCTGCCAGAGTGAGGCAGGAGCCTCAATCTCTCACCTT  
AGATTTACAAACCCTAATAATTTCTGGCCAAATCACAACCACCATCACAATACAACCGCAGTCACA  
ATCACAATCGCAGCAGATGCCGTTTCTTTCCCTAGGCGTTTCGAAGAACAAGAACAATAATGGTGGTAG  
CAACAACAACAATTGCAGCAGCAGTAGCAAATCGGGGGGTGTGGATTTGTCGTCCTTCAGCATATCTTC  
CTCATCGTCTTTTCATGTCGTCGATCACCGGAGAAGGAAGCGTCTCCGGCGGAAAAGGGCAGGGGATAT  
TCATCCCCCGGCGAGTTCTCCGGCTCCGGGAAGCCTCCCCTATCTTCTTCGTCGCACAAGAAGAGAT  
GCCACGAACACGACCATGACCAGGACGACTCCGACGATCTCTCCGGCAAGCTCTCAGGCTCCGGCGG  
CCGCTGCCACTGCTCCAAACGAAGGAACTGAGGGTGAAGAGAACAATAAGAGTGCCGGCGACAAG  
CTCAAAGACGGCGGATATTCCGGCGGATGAGTACTCATGGAGGAAGTACGGCCAGAAGCCCATCAAGG  
GCTCTCCCTTCCCGCGAGGATATTACAAGTGCAGCACGGTTCGAGGATGCCAGCAAGGAAGCACGTA  
GAGAAGGCATCGGATGATCCGAGTATGCTTATCGTCACCTACGAAGGAGATCACCGCCATGACATCCAC  
CTCCCCGTCCCTCCTCCCCCGTCGCTGCCGCTCTCTCTTCCGATGGGAATGGGGTTACCTCCTCCGCC  
GCTCCGGCTTGGTTGAGTCAGCCTCAGCCTCAGCTCAGCTCAACCGCATAG

>*HmoWRKY51*

ATGGAGCAGTTGGTGCACCTCTTATCCCAGCAGCACCAGAATAATGACAATCATCATGATCATCATGAG  
AATCATGGAAGCTCAAGTACAGTGGGTGATGAAGCAGAGTGCAGAGAAGTGAAGCCACAGTTT  
CCAAGTTCAAGCGGCTAATCTCTGTCCTCAATCGTACTGGCCATGCCCATTTCGCCGGGGGCCATCTA  
ACCCTAACCCTAATCTTTCTCTTTCTCTTCATCTTCCTCCTCTGGGTCTCCGCAGCCGAATCTGGTGCTT  
GCTCCCGAGCCGCCCCAGAAGCCTGCCATGGCTGCCAGAGTGAGGCCGAGCCTCAATCTCTCACCTT  
AGATTTACAAACCCTAATAATTTCTGGCCAAATCACAACCACCATCACAATTGCAACCGCAATCACA  
ATCACAATCGCAGCAGATGCCCTTTCTTTCCCTAGGCGTTTCGAAGAACAAGAACAATAATGGTGGTAG  
CAACAACAACAATTGCAGCAGCAGTAGCAAATCGGGGGGTGTGGATTTGTCGTCCTTCAGCATATCTTC  
CTCATCGTCTTTTCATGTCGTCGATCACCGGAGAAGGAAGCGTCTCCGGCGGAAAAGGGCAGGGGATAT  
TCATCCCTCCGGCGAGTTCTCCGGCTCCGGGAAGCCTCCCCTATCTTCTTCGTCGCACAAGAAGAGAT  
GCCACGAACACGACCATGACCAGGACGACTCCGACGATCTCTCCGGCAAGCTCTCCGGCTCCGGCGG  
CCGCTGCCACTGCTCCAAACGAAGGAACTGAGGGTGAAGAGAACAATAAGAGTGCCGGCGACAAG  
CTCAAAGACGGCGGATATTCCGGCGGATGAGTACTCATGGAGGAAGTACGGCCAGAAGCCCATCAAGG  
GCTCTCCCTTCCCGCGAGGATATTACAAGTGCAGCACGGTTCGAGGATGCCAGCAAGGAAGCACGTA

GAGAAGGCATCGGATGATCCGAGTATGCTTATCGTCACCTACGAAGGAGATCACCGCCATGACATCCAC  
CTCCCCGTCCCTCCTCCCCCGTCGCTGCCGCTCTCTCTTCCGATGGGAATGGGGTTTACCTCCTCCGCC  
GCTCCGGCTTGGTTGAGTCAGCCTCAGCCTCAGCCTCAGTCAACCGCATAG

>HuWRKY53

ATGTATCAGATGGAGAGTAATAGCATGAGTGATTCACTTGAAAAGATGCTAATGGATGAGCTAATTCAA  
GGGAGAGATGTTGCTAAGCAGCTTCAATTGATTTTCTTCAAGGATCAACAGCTATCTCCTACTACCTTTT  
CAAATGAGGCACATGCACAAGACTTGATGATCCAAAAGATCTTGGCTTGCTTCGACAAATCAATTACAA  
TTTTGCAGTCCGATTCTGTTAATCAACTATCCCAGCAGATAGCCGTTGGAATTGCCGATTCTCCCACTTC  
ATTATGTGGAAGCCCTAAAAGTCAAGATTCTGACGGAGATTTCAAAGATCCAGACCAGAAAGATGAAC  
AAAAGAAAAGGCAACTTTTCCCTTTGGAGAGGAGAAAGTTGCCAGGTTGTTCAAGCAGTGGACTTGA  
ACAGCCAATTGAAGATGGCTACAATTGGAGGAAATATGGGCAAAAGGACATCCTTGGAGCCAAATATC  
CAAGGGCATATTACAGGTGCACTCTAAGAAAAATGCAAGAATGTTTAGCCACAAAACAAGTGCAAAGA  
TGTGATAAAGACCCTACCATGTTTGAAGTCACATACCGCGGAAAACACACCTGTGCTCAAGCTGCTGC  
TTCCTCCTCCAACCAGCACCCGCACCCTCATCCTAACCCTAACCCTAACCCTAACCCTAACCCGAGCCT  
TGACATTAAACTCGAACCCATGGAAACCCTATCTTATCCTCACCACCAACAACAACCATCACATGAGAT  
CATTTTGAGCTTCCAAATAGACCAACAAAAAGACATCAAACCCTTTAACCCTAACAATAATTATCCTAAT  
AACTCGCCTTCCTTTTCCTTCCCCCTCCTCTTCTAATCCTAGGGTTACCACTCACCCAGCTCCGACAACTG  
TTCTTCATAATAATAACAACCTTCACTAATCACACTAACTTTTCTCCTAATACATATGCGTGTTCTTCG  
AGTGCCATGATGACCACTTTCGATCCACAAGGTCATGCTTCTTCCTCCGCGGCGAACATCAACTCTCCT  
ATGGCAACAACCTCCTGAGTTTCCATTTGATCAAGGCCCAATCCTCTACTCCCCTCCTGCGCCCACAAG  
CGATGGGACAAGTATCGATCAAGGGATTGCATATGTGTTAATGCTGGTGGCATTGGCATTGACGTACCTT  
ATCCACTGAAGGTGCAACCGTGGAAGAGGCTTCACCTTGAGCTTTATCACCATTCTAACAAAAGTGCTT  
GTGATTTTTGCATCGTTTTGTTGTTGCTCTTTTCAATTAATGGGTACTCATTGAGTGGGGTTACAT AACC  
ATTGCCAATTTCCTCAATTGA

>HuWRKY54

ATGGATGAGAAGAAAATGATAAGAGAGGAACTTGTGCAAGTGCTGGAGAGAGGGAAAGAGTCAGCAA  
TCCAGATAAGGAGACTCATTGATCATCATCATCCTCATCATCAAGATGATCATGATGTTGATGATGGGTG  
TTTGAAGTTGAAGTTGAAAGGGCAGGTTGATGCTCATTCTCTGCAGGTCTTGACCTCATTGCCACTGC  
CCTTTCTATGATTCACTACAACCTTCCCTCTTTTGATGATCATCATGATCATGATCATCAAGGTCCGATCA

AAAGACCTAATCCAACCTCTCAAGTCTCGTGTGTTTGGGGATTGGGATGCGCCCAACACTCCTAAGGATG  
CAAGAAGAAGATCCTGCAAGAGGAGGAAGGCTGAACAATCAATGGAAATAGAAACCTCAAATGTGGC  
CGATGGCTATGCTTGGAGAAAATATGGCCAAAAAGTTATCCAAAACACAAAACATCCAAGGAATTACTA  
CAGATGCACACACAAAACCTGAGCAAGGATGTCAAGCAACCAAACAAGTCCAACAAATCTCTGACAAT  
CCTCTCAAGTACAAGATCATTACCATGGCCAGCACAGATGCAAAACCCCCCTTAAAACCCCTCCTATG  
TATAATCTTGATCTCATTGATGGTCAAGATGACTCCTCAAAGTTGCTCAGCTTTGAGAAATTACCAAACA  
ACCCCAAACATGGACTTAATCCCATCCTTTTCCCATCATCATCATCCTCAAAGCAACACCATCATC  
ATCAAGTTCTCCTATGTGTAATGCTATGGTGGAAGGAGTACAAGCCCCGCATGCATGAGATCCCATC  
AGAACCGTCAGATCATCATCATGAGGCCTACATCCAGTGCCCATCATCATCATCCGATCTCACAACT  
ACTACCTTTGCTTCTGATGATGTGATCTCGTTGGCTGAGGTTTATTCTCTGCGCTTAGTCCCTACAATGT  
GGAGGTAGACTATAGCGACATGATGGCTGCTGAGTACATTGATTTCAGTCAAGTGTTTCAA**GACTATGA**  
**TCGTCTATGTTCTTAG**

>*HmoWRKY54*

ATGGATGAGAAGAAAATGATAAGAGAGGAACTTGTGCAAGTGCTGGAGAGAGGGAAAGAGTCAGCAA  
TCCAGATAAGGAGACTCATTGATCATCATCATCCTCATCATCAAGATGATCATGATGTTGATGATGGGTG  
TTTGAAGTTGAAGTTGAAAGGGCAGGTTGATGCTCATTCTCTGCAGGTCTTGACCTCATTGCCACTGC  
CCTTTCTATGATTCACTACAACCTTTCCCTCTTTTGATGATCATCATGATCATGATCATCAAGGTCCGATCA  
AAAGACCTAATCCAACCTCTCAAGTCTCGTGTGTTTGGGGATTGGGATGCGCCCAACACTCCTAAGGATG  
CAAGAAGAAGATCCTGCAAGAGGAGGAAGGCTGAACAATCAATGGAAATAGAAACCTCAAATGTGGC  
CGATGGCTATGCTTGGAGAAAATATGGCCAAAAAGTTATCCAAAACACAAAACATCCAAGGAATTACTA  
CAGATGCACACACAAAACCTGAGCAAGGATGTCAAGCAACCAAACAAGTCCAACAAATCTCTGACAAT  
CCTCTCAAGTACAAGATCATTACCATGGCCAGCACAGATGCAAAACCCCCCTTAAAACCCCTCCTATG  
TATAATCTTGATCTCATTGATGGTCAAGATGACTCCTCAAAGTTGCTCAGCTTTGAGAAATTACCAAACA  
ACCCCAAACATGGACTTAATCCCATCCTTTTCCCATCATCATCATCATCCTCAAAGCAACACCATCATC  
ATCAAGTTCTCCTATGTGTAATGCTATGGTGGAAGGAGTACAAGCCCCGCATGCATGAGATCCCATC  
AGAACCGTCAGATCATCATCATGAGGCCTACATCCAGTGCCCATCATCATCATCATCCGATCTCACAACT  
ACTACCTTTGCTTCTGATGATGTGATCTCGTTGGCTGAGGTTTATTCTCTGCGCTTAGTCCCTACAATGT  
GGAGGTAGACTATAGCGACATGATGGCTGCTGAGTACATTGATTTCAGTCAAGTGTTTCAAGACTATGA  
TCGTCTATGTTCTTAG

>*HuWRKY55*

ATGGAGGAGGAAAGAAATGAGATAGTGAATCTACTCCTCCATGGATGTAGCCTGGCAAGAGATCTCGA  
AGCAAATCTTCAAACTTACCTGCTGGTAACACGCTATGATGATCTCCCATCGATGTGATGAGATAATA  
GGAGCGTTTGTTCAGGCGAGGAACCGGCTTAGCTCCCTGCAGCCTACACCACCAGCTCATCACCAGCA  
AGGAAAAGGAAAGGAAGTTGCCGAAAGCTCTGTGAGGGCTGTAGATGGTGGAGGCCAAGAATTGTCG  
CGTAGTGAGGCTGGTGGGAGCTTGACCTCCCCCGACAGAGAAACCCTAGGAGATCAACCAGGAATG  
ATGATCAAGGTCAGGCAGAGAGGGCGAACAATAAGGAGGGTGTGCGGCCCACTGATAGGGAACACGGA  
GGTGCCACCGGAGGATGGATTTACATGGAGAAAATACGGTCAGAAAGAGATCCTTAATGCCAATTACCC  
AAGGAGCTATTATCGATGTACTCATCAGAAATTATATGGGTGTCCAGCCAAGAAACAAGTCCAACGTCT  
CAACAGTGATCCCTTCATATTTGAGATCGTGTACCGCGGGGAGCACACTTGCCACATGAGCGCCACTGC  
CCCATCAATCCCACCACCCACATCAGATCCAGGCAAGATGATCCTGGCCCATCAGGATCAAATCTCAGC  
CGTCCACCATCCTCAACTCCCTTCTTGATCCCACTGGACATCTCTCGACAATCAGGTGAGGGGGGAA  
GCAGCATATTCACCCACCAACAGGAGCTCAGTAGCATCCTAGGGAGTACCAATGCACCCGCGGGGCCA  
TCAGCCGTTGGATCTCATCATGATCAAAGGAGGGACGGCGTAGATTTCCTCAATCAGAATCCAGTGCTT  
GATGACCACTTTGAATTGGGTGATCTGCCTGATCATATGATGATGTTTAATTCAGGGAACAACGGAAGT  
AATGGCATGGAAGTTATGTTCCCTCCCTCTGATGATAAATGGGATCAGCCCCGAGGATAGAAAAGATTAA

>HuWRKY56

ATGGATGACCACCAAGAAGC CCCACAACTCAACCTATCCCACATCTACCATGTTTCATCTCATGATCATG  
ATCATGATCATCAACCATTGAACCAAACAAGCCTCAACCCTACGATTGTTCCAAATGACGACTTTGATT  
GGTCCGCCCTTCTTAGCTCCCCAACTTCAGGGTTCACTTATAACCCTAATCCTATGGATAATCATGATCAT  
CATCAACGACATGGCCAACAGAGTTCAATGCTTGATTATGATGGTGATAAGGGGTGTATACTAGCAGCT  
GGGATGACAAACAATGGAATTACTAATTTTCATGAGGATAAGTTACGGGATAAGAGGAAGGAGATGACT  
AGTTCGAGGTCAAGAAAGACTACGGTTCCTCGGTTTGCTTCCAAACGAGAAGTTCTCAGGATATTCTT  
GATGATGGGTATCGTTGGAGGAAATATGGCCAAAAATCCGTCAAAAATAGCATCTATCCTAGGAGCTAC  
TATAGGTGCAGTCATCTGACATGCAGTGTAAGAAACAGGTGCAGAGACTATCCAAAGACTCGAGCAT  
GGTCGTGACAACATATGAAGGAGTCCATAATCACCTTGTGAGAAGTTGATGGAAGCCCTTTCTCCGCT  
TCTTGACCAGATGAAA TTTCTTTCTAGTTTAGGCTAA

>HmoWRKY56

ATGGATGACCACCAAGAAGCCCCACAACTCAACCTATCCCACATCTACCATGTTTCATCTCATGATCATG  
ATCATGATCATCAACCATTGAACCAAACAAGCCTCAACCCTACGATTGTTCCAAATGACGACTTTGATT

GGTCCGCCCTTCTTAGCTCCCCAACTTCAGGGTTCAC TTATAACCCTAATCCTATGGATAATCATGATCAT  
CATCAACGACATCGCCAACAGAGTTCAATGCTTGATTATGATGGTGATAAGGGGTGTATACTAGCAGCT  
GGGATGACAAACAATGGAATTACTAATTTTCATGAGGATAAGTTACGGGATAAGAGGAAGGAGATGACT  
AGTTCGAGGTCAAGAAAGACTACGGTTCCTCGGTTTGCTTTCCAAACGAGAAGTTCTCAGGATATTCTT  
GATGATGGGTATCGTTGGAGGAAATATGGCCAAAAATCCGTCAAAAATAGCATCTATCCTAGGAGCTAC  
TATAGGTGCAGTCATCTGACATGCAGTGTAAGAAACAGGTGCAGAGACTATCCAAAGACTCGAGCAT  
GGTCGTGACAACATATGAAGGAGTCCATAATCACCTTG TGAGAAGTTGATGGAAGCCCTTTCTCCGCT  
TCTTGACCAGATGAAATTTCTTTCTAGTTTAGGCTAA

>HuWRKY57

ATGAGCAATCCGGGTAAACC CGACCCAGACGAGTCGAGCTGGTCAGTGCCGGATTCAGATAACCAGCT  
CTACTTCTTCCACCATCATCATCAAATGCTCGCCGAGTTAGGCTGGAATTATACTGATCATCAGCTG  
GAGCAGAGGCTCCCCGAATTTCCACCATCATCTCCCCTTGCCGACGGGGATCAATACCATCCATCCGAT  
GCTCCGCCACATACGGTTACCACTAGCACTTCCTCTCAGTTACCACCTGATCGGAGCTCCGACCCGGCT  
CCTTCAACTTCGAATCCCTCAGTATCCTCCAGCTCGTCCGAAGATCCGGCTGAGAAATCGGGCGTCCGT  
ACGGCTCCCACACCCGAGATTTGACTAAGGAGAAGAAGAAGGTT CAGAAAAGGGTAAGGCAACCCA  
GGTTTGCGTTCATGACAAAGAGTGAGGTTGATCATCTTGAAGATGGTTATAGATGGAGAAAATATGGCC  
AAAAAGCTGT TAAAAACAGTCCATTTCCAGGAGCTATTACAGATGCACAAACAGCAAATGCACAGTG  
AAGAAAAGAGTGGAACGGTCCTCTGAAGATCCAACCATTGTGATAACCACATATGAAGGGCAGCACTG  
TCATCATT CAGTGGGGTTGCATAGAAGTGGTGCCGGATTCCTCGGTGCGCGTGAAATCGGTGCCATTAA  
TG TAGGGCAGTTTGGTGCAGCTTCTCCAACTTCAACATCCCAGTTTTTTGATTTATCCAGGAATGATGCAA  
TTCTCTCATTATGAGCAACATACTTCAGAAAGCATTGCACAAGGCTCAGTTGGTGCTACCACCACCACC  
ACTACTACTCAGTATTCTCATCAGCAATTAGCTGCCACTGGTGATGAAGAGAAAGAAACCCTGCAATCA  
AGCACTGGTGAAGGCTTGCTTGAGATATTGT GTCTCCTGGAATACGAAATCTATGA

>HmoWRKY57

ATGAGCAATCCGGGTAAACCCGACCCAGACGAGTCGAGCTGGTCAGTGCCGGATTCAGATAACCAGCT  
CTACTTCTTCCACCATCATCATCAAATGCTCGCCGAGTTAGGCTGGAATTATACTGATCATCAGCTG  
GAGCAGAGGCTCCCCGAATTTCCACCATCATCTCCCCTTGCCGACGGGGATCAATACCATCCATCTGAT  
GCTCCGCCACATACGGTTACCACTAGCACTTCCTCTCAGTTACCACCTGATCGGAGCTCCGACCCGGCT  
CCTTCAACTTCGAATCCCTCAGTATCCTCCAGCTCATCCGAAGATCCGGCTGAGAAATCGGGCGTCCGT  
ACGGCTCCCACACCCGAGATTTGACTAAGGAGAAGAAGAAGGTTCTGAAAAGGGTAAGGCAACCCA

GGTTTGCGTTCATGACAAAGAGTGAGGTTGATCATCTTGAAGATGGTTATAGATGGAGAAAATATGGCC  
AAAAAGCTGTAAAAACAGTCCATTTCCCAGGAGCTATTACAGATGCACAAACAGCAAATGCACAGTG  
AAGAAAAGAGTGGAACGGTCCTCTGAAGATCCAACCATTGTGATAACCACATATGAAGGGCAGCACTG  
TCATCATTCAGTGGGGTTGCATAGAAGTGGTGCCGGATTCTCGGTGCGCGTGAAATTGGTGCCATTAA  
TG TAGGGCAGTTTGGTGCAGCTTCTCCAAC TTCAACATCCCAGTTTTTGATTTATCCAGGAATGATGCAA  
TTCTCTCATCATGAGCAACATACTTCAGAAAGCATTGCACAAGGCTCAGTTAGTGCTACTACTACTCAGT  
ATTCTCATCAGCAATTAGCTGCCACCGGTGATGAAGAGAAAGAAACCCTGCAATCAAGCAGTGGTGAA  
GGCTTGCTTGAGATATTGTGTCTCCTGGAATACGAAATCTATGAAAGGGCAATTCAGCACACTGGCG  
GCCGTTACTAGTGGATCCGAGCTCGGTACCAAGCTGGCGTAATCATT

>HuWRKY58

ATGGTGGACAACGACGGTGCACCGTCAACAAGGCCGCAGAAGCCGACGATAACGCTGCCGCCTCGAC  
CTGGGCTGGAGTCCCTCTTCATCGGGTCTGGCTTCGGGCTGAGCCCGGGCCCGCTGACTTTGGTCTCG  
AGCTTCTTCTCCCCCTCCGATGCCCGCGATCCTTATTCTTCTCCTCCGACTGCCGCTCTTTCTCTCAGCTCC  
TCGCCGGCGCTATGGCCTCGCCGGGGGCCACCGGTTCAGCGGAGCCGGACCAGGTTCGGTTCAAGCA  
GAACCGGCCTGCTGGTCTGATGATTTCTCCACAACAGCAGCAAGGGGTTTTTCATGATTCCCCCTGGACT  
TAGTCCCACCAGCTTGCTTGATTCTCCCGGTTTATTTCTTGCCAGGGGCCATTTGGGATGTCCCACCAG  
CAGGCGCTAGCTCAGGTTACTGCTCAAGCTCAAGCTAACTTGCAAATGCAAGGTAGTTTTCCATCTCCA  
TTAGGACTAGAGTTCCAAGCATCAGCTCCATTTCTTGTTTCACTACTGATCCAATGCAACAGAATATGG  
TGCCATCTGCGCCAGATTCTAAAGAACAAAAAGATCCATCCCAATTTTCTGGTTCTGATCAAATATCTCA  
ACCCTCCTCGATGATTGTTGATAAGCCTGCTGATGATGGTTACAACCTGGAGGAAATATGGGCAGAAACA  
AGTAAAAGGAAGTGAGTTTCCACGAAGCTATTACAAATGCACGCACCCTAGTTGTCCTGTCAAGAAGA  
AGGTGGAGCGCTCTCTTGATGGCCAAGTGA CTGAGATAATCTACAAGGGCCAGCATAATCATCAACCA  
CCTCTGAAACGTTCAAAAGATAGTGGAAATTCTAATGGCAATGTGCGAACTCAAGGAAATCCTGAGCC  
TGGGTTGCAGTCTCAAGCTGGCAACATCAATGGCAGAAGAGACCAGGAACTAGCCAAGTTACAGAA  
GAGCATCTGTCCAGTGATGGGGAGGAAGTGGTTGATGATGGAGCTAGAGAATCTGAAAGAGATGAAGA  
TGAACCTTATGCCAAGAGGAGGAATACGGAATTCAGGGCGTCAGAGCGAGCTTCATCACACAGAACAT  
TAACAGAACCCAAGATTATTGTCCAAACAAC TAGTGAAGTCGATCTTTTGGATGATGGTTACAGGTGGC  
GCAAATATGGACAAAAAGTTGTCAAAGGAAATCCATATCCAAGGAGCTATTATAAATGCACTACCCCAG  
GATGCAATGTCCGAAAGCATGTTGAGCGTGCGGCCTCAGACGCTAAAGCAGTCGTAACGACATATGAA  
GGCAAACATAATCATGATGTTCCGGCTGCTAGAACGAGTAGCCATAGTACAGCCAACAGTGCAGCACA

ACTGAAAAC TGCAAATAACAACAGCTATGCTGGGAAGACGGATTTTATGAAAACAATCAACAGCCTA  
GAGCACTTTTACAATTAAAGGAAGAAAGAATAACATAG

>*HmoWRKY58*

ATGGTGGACAACGACGGTGCACCGTCAACAAGGCCGCAGAAGCCGACGATAACGCTGCCGCCTCGAC  
CTGGGCTGGAGTCCCTCTTCATCGGGTCTGGCTTCGGGCTGAGCCCGGGCCCGCTGACTTTGGTCTCG  
AGTTCTTCTCCCCCTCCGATGCCCGCGATCCTTATTCTTCTCCTCCGACTGCCGCTCTTTCTCTCAGCTCC  
TCGCCGGCGCTATGGCCTCGCCGGGGGCCACCGGTTACGCGGAGCCGGACCAGGTTTCGGTTCAAGCA  
GAACCGGCCTGCTGGTCTGATGATTCTCCACAACAGCAGCAAGGGGTTTTTCATGATCCCCCTGGACT  
TAGTCCCACCAGCTTGCTTGATTCTCCCGGTTTATTTCTGCGCCAGGGGCCATTGTTGGGATGTCCCACCAG  
CAGGCGCTAGCTCAGGTTACTGCTCAAGCTCAAGCTAACTTGCAAATGCAAGGTAGTTTTCCATCTCCA  
TTAGGACTAGAGTTCCAAGCATCAGCTCCATTTCCTTGTTTCACTACTGATCCAATGCAACAGAATATGG  
TGCCATCTGCGCCAGATTCTAAAGAACAAAAAGATCCATCCCAATTTTCTGGTTCTGATCAAATATCTCA  
ACCCTCCTCGATGATTGTTGATAAGCCTGCTGATGATGGTTACAACCTGGAGGAAATATGGGCAGAAACA  
AGTAAAAGGAAGTGAGTTTCCACGAAGCTATTACAAATGCACGCACCTAGTTGTCCTGTCAAGAAGA  
AGGTGGAGCGCTCTCTTGATGGCCAAGTGACTGAGATAATCTACAAGGGCCAGCATAATCATCAACCA  
CCTCTGAAACGTTCAAAAGATAGTGGAAATTCTAATGGCAATGTCCGGAACCTCAAGGAAATCCTGAGCC  
TGGGTTGCAGTCTCAAGCTGGCAACATCAATGGCAGAAGAGACCAGGAAACTAGCCAAGTTACAGAA  
GAGCATCTGTCCAGTGATGGGGAGGAAGTGGTTGATGATGGAGCTAGAGAATCTGAAAGAGATGAAGA  
TGAACCTTATGCCAAGAGGAGGAATACGGAATTCAGGGCGTCAGAGCGAGCTTCATCACACAGAACAT  
TAACAGAACCCAAGATTATTGTCCAAACAACCTAGTGAAGTCGATCTTTTGGATGATGGTTACAGGTGGC  
GCAAATATGGACAAAAAGTTGTCAAAGGAAATCCATATCCAAGGAGCTATTATAAATGCACTACCCAG  
GATGCAATGTCCGAAAGCATGTTGAGCGTGCGGCCTCAGACGCTAAAGCAGTCGTAACGACATATGAA  
GGCAAACATAATCATGATGTTCCGGCTGCTAGAACGAGTAGCCATAGTACAGCCAACAGTGCAGCACA  
ACTGAAAAC TGCAAATAACAACAGCTATGCTGGGAAGACGGATTTTATGAAAACAATCAACAGCCTA  
GAGCACTTTTACAATTAAAGGAAGAAAGAATAACATAG

>*HuWRKY59*

ATGGATAGAACTACCAAACCACC ACTCCAATGACTACTACCACTTTTAGCTCCCTAGAATCCTCAGGG  
AGTGATCAGTATATCGAGGGCACAGACTTCGAGGTCTCAGAGTTCTTCTCGAATTTTCGAGTGGGGGAC  
GGCAGAGACAGAATCCATGGATTTTATTGGGCAGAGCCAGGATTTTGGATACCAAGGAAATGAGTTCTA  
TGACCAATTTGGAGGAAGTAGCAACCAGCAACAAAATGTGGAAGACAGTAGCAGAGGCAGCAGAAAT

AGTAAGGAGAAGAAGGATGATAGGGGAAGGATTGCATTGAGAATGAGATCGGAGATTGATGTTGTAGA  
AGATGGTTACAAATGGAGAAAATACGGGAAAAAGATGGTCAAGAATAGTCCAAACCCAAGGAACTACT  
ACAGGTGTTTCAGTAGAAGGCTGTCCAGTGAAGAAAAGGGTCGAAAGAGACAAGGAGGATCCACACTA  
CGTAATAACAACGTATGAAGGCATCCATAGC**CATGACGCTCCAAGGCAATGA**

>*HmoWRKY59*

ATGGATAGAACTACCAAACCACCACTCCAATGACTACTACCACTTTTAGCTCCCTAGAATCCTCAGGG  
AGTGATCAGTATATCGAGGGCACAGACTTCGAGGTCTCAGAGTTCTTCTCGAATTTTCGAGTGGGGGAC  
GGCAGAGACAGAATCCATGGGTTTTATTGGGCAGAGCCAGGATTTTGGATACCAAGGAAATGAGTTCTA  
TGACCAATTTGGAGGAAGTAGCAACCAGCAACAAAATGTGGAAGACAGTAGCAGAGGCAGCAGAAAT  
AGTAAGGAGAAGAAGGATGATAGGGGAAGGATTGCATTGAGAATGAGATCGGAGATTGATGTTGTAGA  
AGATGGTTACAAATGGAGAAAATACGGGAAAAAGATGGTCAAGAATAGTCCAAACCCAAGGAACTACT  
ACAGGTGTTTCAGTAGAAGGCTGTCCAGTGAAGAAAAGGGTCGAAAGAGACAAGGAGGATCCACACTA  
CGTAATAACAACGTATGAAGGCATCCATAGCCATGACGCTCCAAGGCAATGA

>*HuWRKY60*

**ATGGATTACTCAAATTCACAACGA**ATTGGTTGATGAGTTCAGCCTCCTTGGAAATTGGAGCTCAGCAGC  
AGCAATGGCGGAAGCACTCTCCCACTCTTCGACGAGTCTCCTGTTCGCGATAACTCCTCCAGGAAGCT  
CGGCGTTCAGCACAGCGTCTCCCCCTCGATTGAAGTCGCCAGCCAACTCTGGCTCAACAAGGATGAGG  
CGGGAGCTTTGGTGGAAGAGTTGAACAGGGTGAACGCGGAAAATAAGAGGCTAACGGAAATGCTAAC  
GGTCGTGTGTGAGAATTACAACGAATTAAAGAGGAAGTTGACGGATTACATGAGCAACGGTGCTACTA  
GCATCAATAACGAGACTGAGAGTAGCAACCCGGTCAAGAAAAGGAGGACAGAGAATCTCTCTAATGG  
CAACAATAAAAATAGCAATGTTGAGAGTATCTCGAGCGATGAAGAAGATTCGTATGGAAAACCAAAGG  
AGCTAGAGACCGTGAAGGCGAAGATCACTAGGGTTGCTGTTGGAACGGAAGCTTCTGACTCAAGCCTT  
ATACTTAGAGATGGATATCAATGGAGGAAATACGGGCAAAAGGTGACTAGGGACAATCCTTGCCCTAGG  
GCTTACTTCAAGTGCTCATTTGCTCCTACTTGCCCTGTAAAGAAGAAGGTTCAAAGAAGTCTAGAAGA  
CCAATCCATGCTGGTAGCGACTTACGAAGGAGAGCACAAACCATCCACCCCCAGTTCAACCAGAGGCAA  
CTCCAGGTTTCAGGCGTAAGCCGAAGCGTCGCCCCAACCCCTAGGCTCGGTCCCCACCTTAGGCTCGGCC  
GTGCCCACGGTCACCCTTGACCGAGCAAAGCCCAAGCCCAACAACATTACAAATGACACACCCAACC  
CCACCAAAAATGCTGACCAACACAAGTACTGGTAGCGAGGCCCAAGCCCAGCCAATGAAATTCAACTCC  
TCAGAATTCCAGAAGTTCTTGGCAGAGCAAATGGCCTCCTCCTTGACAAAAGATCCCAACTTCACCGC  
CGCCCTTGCCGCTGCCATTTCCGGGCGGTT**TGCCCAGCGGAGTTCAAGTGATTAG**

>HmoWRKY60

ATGGATTACTCAAATTCAACAACGAATTGGTTGATGAGTTCAGCCTCCTTGGAATTGGAGCTCAGCAGC  
AGCAATGGCGGAAGCACTCTCCCACTCTTCGACGAGTCTCCTGTTTCGCGATAACTCCTCCAGGAAGCT  
CGGCGTTTCAGCACCGGGTCTCCCCCTCGATTGAAGTCGCCAGCCAACTCTGGCTCAACAAGGATGAGG  
CGGGAGCTTTGGTGGAAAGAGTTGAACAGGGTGAACGCGGAAAATAAGAGGCTAACGGAAATGCTAAC  
GGTCGTGTGTGAGAATTACAACGAATTAAAGAGGAAGTTGACGGATTACATGAGCAACGGTGCTACTA  
GCATCAATAACGAGACTGAGAGTAGCAACCCGGTCAAGAAAAGGAGGACAGAGAATCTCTCTAATGG  
CAACAATAAAAATAGCAATGTTGAGAGTATCTCGAGCGATGAAGAAGATTCGTATGGAAAACCAAAGG  
AGCTGGAGACCGTGAAGGCAAAGATCACTAGGGTTGCTGTTCGAACGGAAGCTTCTGACTCAAGCCTT  
ATACTTAGAGATGGATATCAATGGAGGAAATACGGGCAAAGGTGACTAGGGACAATCCTTGCCCTAGG  
GCTTACTTCAAGTGCTCATTGCTCCTACTTGCCCTGTAAAGAAGAAGGTTCAAAGAAGTCTAGAAGA  
CCAATCCATGCTGGTAGCGACTTACGAAGGAGAGCACAACCATCCACCCCCAGTTCAACCAGAGCCAA  
CTCCAGGTTTCAGGCGTAAGCCGAAGCGTCGCCCCAACCCCTAGGCTCGGTCCCCACCTTAGGCTCGGCC  
GTGCCCACGGTCACACTTGACCGAGCAAAGCCCAAGCCCAACAACATTACAAATGACGCAGCCAACC  
CCGCCAAAATGCTGACCAACACAAGTACTTGTAGCGAGGCCCAAGCCCAGCCAATGAAATTCAACTCC  
TCAGAATTCCAGAAGTTCTTGGCAGAGCAAATGGCCTCCTCCTTGACAAAAGATCCCAACTTCACCGC  
CGCCCTTGCCGCCGCCATTTCCGGGCGGTTTGCCCAGCGGAGTTCAAGTGATTAG

>HuWRKY61

ATGCCTGATCCAACGTCGAAATCTTCTGATCATGCAGGAGAGAACAGTGATGAACTCACCGAAAAAG  
GGCTGAGGCTGACCCTAATTCTCCAAACAATACCACCAACGATGATGAAATGCAGAAGGTGCAGGCTG  
GAGAACTTGAATCAGCAAAAAGCTGAAATGGGTGAAGTGATGGAGGAAAACCAAAGGCTTAAGCAATA  
TCTAGATCAAATCATGAAGGATTATCAAGCACTACAAATGAAATTTTATGAAATCACCCAACAAGCAGC  
AGACTCCAAGAACCCTAACAAAACCAACTTGATCATCGCAAATCCTTCCCCTCTTCCTTCTCGAGCAAT  
AATGGAAGATGATCAAGACGAAGCAGAACTTGTTTCCCTTAGCCTAGGGCGAACTTCGAGTCTCGATT  
CAAAGAAAAGCATTAGCAACAAGTCAAACATCCAAGCTGATAAGCTGGTAAACAAAGAAAAAGATGT  
AGCTAATGGGAGTAAGAGTTATAATGTAGAGGGTCCTATGGAGCGAAGCCTGGATCTTGGATTAGACTG  
TAAGTTCGAAACATCAAGAACAACATCGCTTGACCATCGGCAAGCGCTAATGCTGAGTTCAAGCCCAG  
ATAATAGTTTAGATGACATGAAGGATGGGGAAGCTGGTGAAAAACAGACAAGTACAGCACTTAAGAGA  
AGTGGCAGTGGTGATGATGAAGTGGTGCAACAACCCCTGTGAAGAAGGCTAGGGTTTCTGTCAGAG  
TTAGATGTGATACCCCTACCATGAATGATGGATGTCAATGGAGAAAATATGGGCAGAAAATTGCAAAGG

GAAATCCATGCCCCGCGAGCATACTATCGTTGCACTGTTGCTCCATCCTGTCCTGTGAGGAAACAGGTAC  
AAAGATGCGCAGAAGACATGTCAATCTTGATAACAACGTATGAAGGAACTCACAATCATCCACTTCCA  
GTCTCAGCAACTGCTATGGCTTCCACAACCTCGGCTGCTGCTTACATGTTGATGTCTGGGTCATCAAGC  
TCTGGTCATCAAGGATCCAACCTCGACCACGACGACGACACTAGCTACCACAGGAGCTGAGCTCCATAG  
TGGCCTTAACTTCAATATACCCGATAGCTCGAAACTAAAACCATTGTACTTACCCAACTCATCCTCTACA  
TTTTTGCCTGCTCCAACCCACCCAACCATAACGCTTGACCTTACTTCCACACCCTCATCTTCTGCTACCC  
AATTCAACAGGGCAACTCCTAGTTTTTGCACCTAGATACCCCTCCACAAACCTCAACTTCAATTCCTCAA  
ATAATCCCAACAATAACCCTTCCATCTCTTGGCCTAATATTGGCCTTCTTAACTATGCCACTCAACCACCT  
AACAACAAAAGCCAATTTAGCCCACTAGACTTTGGCTCATCAAGACACCCTACTCTTCAAGATGCATCC  
TCCTTCAACTTCCAAACTTTCTTGCAAAAAGGCAACCCTAATAATCCCTCTAATCCACCACCTGTACCC  
GACACAATTGCCCAAGCAGCCAAAGTACTTACTTCGGATCCTAGTTTCCAAGCAGCTCTAACTGCAGCC  
CTCTCATCCTTCATTAGCAGCAGCAATGGCAACGTTGGTGCTGGGATTCTAGGAGGTGACATTAACATT  
AGTGATCTTGACACAGAAGATTAAGTGGGGTGGTGTTCAAACATCTTCAAATGTTCACTCATCAACATCT  
CAATCCACAAACAAGGGGACAAATAATGGATGTGGATCGAGATTATTGAGCATGGCTTCTTCTGCAACA  
AATAATTCTCAACCTAATGGAAGCTTGATGTTCCCTCCCTCCATTGCCTTTACCTGGATCTAAAAGCA  
CCTCTACTTCTCCA

GGTGATAGTAGAGACAATGCTAACTGA

>HuWRKY62

ATGGATGAGAAAGTGACGAGAGAGAAGCTTGTGCAAGTGTTGGAGAGAGGCAAAGAGTCAGCAACC  
CACATCAGGAGACTAATTGATCATCATGATAGTGGGTTCTTGAAGGTCTTGAAAGGCCAGCACCTTGAT  
GCTCATTGTTTGGATGTCTTAAACTCATTGCTACTGCCCTTTCTATGATTCCCTACTACTTCCCTCTTTT  
AATGATCATCATGATCATGATCATGATCATCAAAGTCCGATCAAAAGGCCTAATCCAATCCTGAAGTCCC  
AAGTGGCTGAGGAGTACTTGGAGGCTCCTAATGCCCCAAAGGATGCAAGAGGGTCCTACAAGAGGAG  
GAAGACAGAACGAGCAGTGGAAATAGAAACCCAACATGTGGGCGATCGCTATGCTTGGAGAAAATATG  
GGCAGAAATTTATCCAACACACAAAGCACCCAAGGAACTACTACAGATGCACACACAAAACGGAGCA  
AGGGTGCCAAGCAACAAAGCAAGTCCAACAAATCTCAGACAATCCTGCAAAGTACAAGATCATCTACT  
ATGGGCATCACACTTGCAAAAGCCCCCTTAAAAACCCTCCTATGTATCTTGATCTCATTGACGACCAAC  
ATAAAAATTCCTCCATTTTGCTCAGCTTCGAAGCACCAAACAACCCCAAACATGGCCTTAACCCCTTCA  
TGCTTTCATCATCATCGTTGTCGTCTTCATCATCAACAACAACATCAGCTGCTCCCATGAGTACAGTGGA  
TCTCATTGATGAACTAGAATGTACACCCATCAAGGATATGATCCCATGGAGCAATTGGATCAGCATCAA

GGAGCCAATATCCAGTGCCCATCATCGTCCGATTTTCTTTCTACCACTTCTGATCTCACAAGTACTAGCT  
TTGTGTCTGATGATGTGATCTCATTAGCTGAGATTTATTACTCTGCGCTTAGCCCCCTACGGTGTGGGGGA  
AGACTATAGCTACATGAATTATGAGTCCTTTGATTTTCAGCCAAGTGTTTCAAGATA**GTTACCTTCTTCGT**  
**GCATGA**

>HuWRKY63

**ATGGGGAATGTGGACGTACC**ACCTGAGGATGGCTATACTTGGAGAAAATATGGCCAAAAAGAGATTCTT  
CATGCCAAGTATCCCAGAAGTTACTACAGATGTACACATCAAAAGTTATACAATTGCCCAGCTAAGAAG  
CAAGTCCAACGACTAAACGACGACCCTTTTACGTTTCGAGATCCTCTACAGAGGGGAACACATTTGCCA  
CAAAGCCTCCACTGCTCCGATGGCCCCACCACAACGATCTCAAACCGCCAAAGACATCATCTCTCCTC  
ACAAGCCAATCGCAACCGTTTATTCTCTGCTAAATCAGTGGTTACCAGTGGACTTTCCCACCCCGCTCA  
CTGAAGGCGCGAGCACCGTAACGCAGCCCACCAAGGAGCCTTCTGCATTGGGTTTGACCAGATGCATC  
AGTAACCCATGGAACTACAATGCATCCCCGGGACCCTCCACCGTCGGATCTCATCATGATGGAATGGAC  
GTCGCTGATTTTCTTAATCATACGGTGGAGGACTTTGTTGCTCATGTCAATGTGATGCTCAATTCTGGCA  
GTAATTGTAGCAGCAGTAGCATGGAGGTCAATTTTC**CTGCCTTCGATAACAAATGA**

>HuWRKY64

**ATGATCTCCATCGATGT**GATGAGATAATAGGAGCGTTTGTTCAGGCGAGGAACCGGCTTAGCTCCCTG  
CAGCCTACCCCACTCATCACCAGCAAGGAAAAGGAAAGGAAGTTGCCGAAGCTCTGTGAGGGCT  
GTAGATGGTGGAGGCCAAGATTGTCGCGTAGTGAGGCTGGTGGGAGCTTGACCTCCCCCGACAGAG  
AACCCTAGAGATCAACACGGCAGAGAGGCGAACAATAAGGAGGGTGTCGGCGCCACTGATAGGGAAC  
ACGGAGGTGCCACCGGAGGATGGATTTACATGGAGAAAATACGGTCAGAAAGAGATCCTTAATGCCAA  
TTACCCAAGGAGCTATTATCGATGTACTCATCAGAAATTATATGGGTGTCCAGCCAAGAAACAAGTCCA  
ACGTCTCAACAGTGATCCCTCCATATTTGAGATCGTGTACCGCGGGGAGCACACTTGCCACATGAGCGC  
CACTGCCCCATCAATCCCACCACCCACATCAGATCCAGGCAAGATGATCCTGGCCCATCAGGATCAAAT  
CTCAGCCGTCCACCATCCTCAACTCCCTTCTTGATCCCACTGGACATCTCTCGACAATCAGGTGAGGG  
GGGAAGCAGCATATTCACCCACCAACAGGAGCTCAGTAGCATCCTAGGGAGTACCAATGCACCCGCGG  
GCCATCAGCCGTTGGATCTCATCATGATCAAAGGAGGGACGGCGTAGATTTCTCAATCAGAATCCAG  
TGCTTGATGACCACTTTGAATTGGGTGATCTGCCTGATCATATGATGATGTTTAATTCAGGGAACAACGG  
AAGTAATGGCATGGAAGTTATGTTCCCTCCCTCTGATGATAAATGGGATCAGC**CCGAGGATAGAAAAGA**

TTAA

>HuWRKY65

ATGGAGGGCATCACAAGCTGCTTCACTACTACTACTGCTACTACTGCTATTACTGATCATCATCGCTTGTA  
TCAATTGGAGGAGAGAGAGAAAACCTCGTCGGATAACAGTGGAGATAACTCTCCATCCTCCACTGCCTTCG  
CATCCTCGATCCCCTCCCCTAAGAGAAGTAGGCGAGCTATACAAAAGAAGGTGGTCACGGTCCCTATCA  
AGGATGTGGAGGGTTTCGAGGTTTAAGGGTGATTGTACGCCACCGTCTGATTCATGGGCTTGAGGAAG  
TACGGCCAGAAACCTATCAAGGGCTCTCCTTATCCTAGGGGGTACTATAGATGTAGCAGCTCCAAGGGG  
TGCCAGCAAGGAAGCAAGTAGAGAGAAGCCGTGCAGATCCAACCATGCTTGTCATCACTTACTCTTA  
CGAACACAACCACGCCTGGCCCACTTCTCGAAACCGAGACAAATCGGCTGCCACCACCACCACCAAC  
GCATCCGCTACCGCCACAGCTGCCACCACGAACACCCCCAATGCCACCGCCATCGCCACCGCCGTCCTCC  
AACCTCTCTTCCCAAATAGAGATCAACCACAGTAACCACCCTCACCAACTCGGCGGCCACGATCAGC  
CCTTGATGGTCCCCACCGACGAGCTGACCTGGCTCACCTCCGACTCCAACATGTCGTCGTTCTTCTCAA  
ATTGCGCGTTTGGAGACCTTGACATGGCGAAGATATTTCTTTGGGGGAAGAAGAAGAAGCCCTCTTT  
GCCGACCTCGGTGAGCTGCCCAGTGCTCCGTCGTCTTCGGGCAGCCACCCACGGGCATGAGAGAGA  
AAGAGGAGCAGCAGCAACAAGA GTGCGGCTTCAACTGGTGA

>HuWRKY66

ATGGATAGTTACTCTAGTCCTGAG AATCTGGAATCACGCAGATGCAGATCCAAGGAAGCCCAGTCAGG  
GAATGAGGCCTCCAAGAAAAGGAAGCAGGAGTTGTTTGAGAATGAAAAGAGACTGGTGAGGGTTAA  
GGTTGAAGCAGTAACAAATGGTGAAGGTGATGCTGATCATCACAAACAGAAACACAAGAGTGAAC TA  
GGGTCCCCCTCCTCCACCTCCGGATTCATGGTCCTGGCGGAAATATGGTCAAAAACCCATCAAAGGATCT  
CCTTATCCCAGGGGT TACTACAGGTGCAGCACAGGCAAGGGATGTTTGGCCAAGAAACAAGTAGAAG  
GGTGCAAAGAAGATGCTTCCGTCTTCATCATCACTTACACCTCTCCCCACAACCACAACCGTATTGGTC  
ATGCAGGGCCAATGGCCAACCTCGAGCACCCAAAAGCATCGACCTCATTCTCCTGACAAACGAACCCAC  
AGCAGCAATAATAAGCACACATGTGTTGAGCATCAGCACAGCAGCTCAAATGCAATGCCAATGGCAAA  
ACAGGAGGCACAAGAGCCAGAGCCTTATGTGGTGAGCCTCGATGGTATTACCCCTCTGCCTCTCCCTCT  
ATCTCATCATGATCAACAGCACCCCTTTGCTTCATATGATCTCAA GAGTCATCCCGCATCACAAGGAAAC

TAG

>HmoWRKY66

ATGGATAGTTACTCTAGTCCTGAGAATCTGGAATCACGCAGATGCAGATCCAAGGAAGCCCAGTCAGG  
GAATGAGGCCTCCAAGAAAAGGAAGCAGGAGTTGTTTGAGAATGAAAAGAGACTGGTGAGGGTTAA  
GGTTGAAGCAGTAACAAATGGTGAAGGTGATGCTGATCATCACAAACAGAAACACAAGAGTGAACATA  
GGGTCCCCCTCCTCCACCTCCGGATTCATGGTCCTGGCGGAAATATGGTCAAAAACCCATCAAAGGATCT  
CCTTATCCCAGGGGTACTACAGGTGCAGCACAGGCAAGGGATGTTTGGCCAAGAAACAAGTAGAAG  
GGTGCAAAGAAGATGCTTCCGTCTTCATCATCACTTACACCTCTCCCCACAACCACAACCGTATTGGTC  
ATGCAGGGCCAATGGCCAACTCGAGCACCCAAAAGCATCGACCTCATTCTCCTGACAAACGAACCCAC  
AGCAGCAATAATAAGCACACATGTGTTGAGCATCAGCACAGCAGCTCAAATGCAATGCCAATGGCAAA  
ACAGGAGGCACAAGAGCCAGAGCCTTATGTGGTGAGCCTCGATGGTATTACCCCTCTGCCTCTCCCTCT  
ATCTCATCATGATCAACAGCACCCCTTTGCTTCATATGATCTCAAGAGTCATCCCGCATCACAAGGAAAC  
TAGAGGATCAAAACTACGACTTCTTTGATGAGCTTGAGTTGGACCTTTAA

>HuWRKY67

ATGATCGGAGGTACCAAAATGCAACAAGTGACAATCAGTACTGTTGGACTAACACATCAAGATGGCTAT  
TCATGGAGAAAATATGGTCAAAAGCCAATTGTCAATGCAAAGCATCCAAGGTATATAAGTGTAAGGACG  
ATGCACATTGACTAA

>HmoWRKY67

ATGATCGGAGGTACCAAAATGCAACAAGTGACAATCAGTACTGTTGGACTAACACATCAAGATGGCTAT  
TCATGGAGAAAATATGGTCAAAAGCCAATTGTCAATGCAAAGCATCCAAGGTATATAAGTGTAAGGACG  
ATGCACATTGACTAA

>HuWRKY68

ATGGCCGAGAAGTACAACAAACTCAGCCTGAATCAAATTCAAATCCAACCTTTGATGGAGATGAACAA  
CAACATCAGCGATTACCAGACGATGTTTCGACGCTCCGTTTCAGTTGGGTATATTCGACAACCTACACCAA  
GCCCCGGCTACTCATCCGGGTTCGGGTTCATGGATATGCTCGGAATCCAAGATTTGCGCCGCCCTACTTCC  
TTGTTTCGATCTCCTTCCGCCGCCGCCGGAGCCTCCGTTGCAGCCGCCCTCGTCCGGATCCGTCTCCCAGT  
AGCTCGGGTCACCCGGGAGATAATCAGTCCTCCGAAGCGGAGGTCTGCAACACCCCAGCCAACTCCAT  
CTCCGTCTCTTCTCCTCTTCGGAAGCCGCCGATGATAAGGCGGCCACACGCGCCGCCGCTAGTGGCG  
GAGGTGATGGAGATGGAGATGGTGAAGAGGAGGTGGAGCACCCGAATCTTCCAGGAGAAGATAACAA  
GTCTAAGAAGCAGTTAAAGGTGGCAAAAAAGAAAAATCAGAAAAGGCAGAAAGAGCCGAGATTGCG  
GTTTCATGACTAAGAGCGAAGTTGATCACCTTGATGATGGCTACCGTTGGCGTAAGTATGGCCAAAAAGC  
CGTTAAGAACAGCCCCTTTCCCAGGAGCTACTACCGTTGCACCACAGCAGCATGCGGGGTGAAGAAG

AGGGTGGAACGGTCCTCAGACGACCCAACCATCGTGGTGACCACCTACGAGGGGCAGCACACCCATC  
CGTGCCCGGTGGTCACCCGTGGTGGCATAGGCCTCAACCTAGGCCTAGGGACAGGACTTGTCCCCTCA  
CCATCACCCTGTGCGCTTTTCTGGATCAATGCAGCACCCTCCTACTATAGGAGGCAGTGCTGCATCAT  
CCGCTCTCTTCCCTCCACCACCACCATCACACATTCCCTGGTTATTTTCATAACCCCAACCCACTCTCCCTT  
CTCCTTAACTGGCGACGGTGGTGGTAGTGGTGGTGCTGTGCAGCCTGCTCAAAATCAAAATCAAGGGA  
ACTTGATAATACAAAACATTAGCCTCCAGCAGAGACAAATGATATTGAGGGCTCCATGTTTGGCTTCTTC  
TTTGACACCAGCAACAAGTTAGAGATGATGGGCTTCTTCAGGACATCGTGCCATCGCAAATGCGCAA**CC**  
**AAGCCACAGCAAAAGAAGAGTAA**

>*HmoWRKY68*

ATGGCCGAGAAGTACAACAAAACCTCAGCCTGAATCAAATTCAAATCCAACCTTTGATGGAGATGAACAA  
CAACATCAGCGATTACCAGACGATGTTTCGACGCTCCGTTTCAGTTGGGTATATTGGACAACTACACCAA  
GCCCCGGCTACTCATCCGGGTTCGGGTTCATGGATATGCTCGGAATCCAAGATTTGCGCCGCCCTACTTCC  
TTGTTTCGATCTCCTTCCGCCGCCGCCGGAGCCTCCGTTGCAGCCGCCTCGCCCGGATCCGTCTCCCAGT  
AGCTCGGGTCACCCGGGAGATAATCAGTCCTCCGAAGCGGAGGTCTGCAACACCCCAGCCAACCTCCAT  
CTCCGTCTCTTCCCTCCTTTCAGAAGCCGCCGATGATAAGGCGGCCACACGCGCCGCCGCTAGTGGCG  
GAGGTGATGGAGATGGAGATGGTGAAGAGGAGGTGGAGCACCCGAATCTTCCAGGAGAAGATAACAA  
GTCTAAGAAGCAGTTAAAGGTGGCAAAAAAGAAAAATCAGAAAAGGCAGAAAGAGCCGAGATTTGC  
GTTTCATGACTAAGAGCGAAGTTGATCACCTTGATGATGGCTACCGTTGGCGTAAGTATGGCCAAAAAGC  
CGTTAAGAACAGCCCCTTTCCCAGGAGCTACTACCGTTGCACCACAGCAGCATGCGGGGTGAAGAAG  
AGGGTGGAACGGTCCTCAGATGACCCAACCATCGTGGTGACCACCTACGAGGGGCAGCACACCCATC  
CGTGCCCGGTGGTCACCCGTGGTGGCATAGGCCTCAACCTAGGTCTAGGGACCGGACTTGTCCCCTCA  
CCATCACCCTGTGCGCTTTTCTGGATCAATGCAGCACCCTCCTACTATAGGAGGCAGTGCTGCATCA  
TCCGCTCTCTTCCCTCCACCACCACCATCACACATTCCCTGGTTATTTTCATAACCCCAACCCACTCTCCCT  
TCTCCTTAACTGGCGACGGTGGTGGTAGTGGTGGTGCTGTGCAGCCTGCTCAAAATCAAAATCAAGGG  
AACTTGATAATACAAAACATTAGCCTCCAGCAGAGACAAATGATATTGAGGGCTCCATGTTTGGCTTCT  
TCTTTTGACACCAGCAACAAGTTAGAGATGATGGGCTTCTTCAGGACATCGTGCCATCGCAAATGCGCAA  
CCAAGCCACAGCAAAAGAAGAGTAA

>*HuWRKY69*

**ATGGTTATGGAAAATAAATATCGGAG**TAGCTCCTATTTACCGATCAAGACGACCCACAAAGCTCGTCT  
GAGAATCGGCCCCGACTCCCCCTCTCCGGTGATGACTCCCGAGCTACCGCCACCGCCCCCTTCCCCTAAG

AGGAGGAGAAGCATCCAGAAGAGAGTGGTGCATGTACCAATAGGAGATGGTGACGGATCAAGGACCA  
AAGGGGAGGCGTATCCACCGTCGGATTCATGGGCGTGGAGAAAGTACGGTCAGAAACCAATCAAGGG  
CTCTCCATATCCCAGGGGATACTACCGATGTAGCAGCTCCAAAGGGTGCCCTGCCAGAAAACAAGTGG  
AGAGGAACCGTGTGGACCCACCGTGCTTATTATTACCTACGCTTGTGAGCACAACCACCCCCTGCCTA  
CCTCCAAGCACCACCATAGTCACCAGGTTGCCACCGCAACCACCACCCCAACTGAAAACGCCACCGCT  
TCTCCTGCCACGACCACCACGTCGGCTGACGCTGATCAGGCCAATGACGGCGGTGACGAGCTGTTGGT  
TGAGATGAATCCAAACCCGTTTGGTGACCCGCCCCAACTCGAGTTCGTCCGGGACGCCGTGATGTTGG  
GCGTTGAATACAGTTGGATATCCGACATGATGTCCTTCAGTACGACATCGTTGCTTGTGGGGCCGGCGT  
CCGCGTGTGATGACGTGGAGATGTCTACTAATTTTGCAATGAGAGAAGAAGACGAGTCATTGTTTGA  
GACCTTGATGAACTGCCGGAATGCTCTCTGGTTTTTCGGAGAAATCAAGGAAACATTGTTGAAAGGTG  
TAATGCCACTGCTCCAC**TTTGTGGTAGCACGGGATGA**

>*HmoWRKY69*

ATGGTTATGGAAAATAAATATCGGAGTAGCTCATATTTACCGATCAAGACGACCCACAAAGCTCGTCG  
GAGAATCGGCCCCGACTCCCCCTCTCCGGTGATGACTCCCGAGCTACCGCCACCGCCCCTTCCCCTAAG  
AGGAGGAGAAGCATCCAGAAGAGAGTGGTGCATGTACCAATAGGAGATGGTGACGGATCAAGGACCA  
AAGGGGAGGCGTATCCACCGTCGGATTCATGGGCGTGGAGAAAGTACGGTCAGAAACCAATCAAGGG  
CTCTCCATATCCCAGGGGATACTACCGATGTAGCAGCTCCAAAGGGTGCCCTGCCAGAAAACAAGTGG  
AGAGGAACCGTGTGGACCCACCGTACTAATTATTACCTACGCTTGTGAGCACAACCACCCCCTGCCTA  
CCTCCAAGCACCACCATAGTCACCAGGTTGCCACCGCAACCACCACCCCAACTGAAAACGCCACCGCT  
TCTCCTGCCACGACCACCACGTCGGCTGACGCTGATCAGGCCAATGACGGCGGTGACGAGCTGTTGGT  
TGAGATGAATCCAAACCCGTTTGGTGACCCGCCCCAACTCGAGTTCGTCCGGGACGCCGTGATGTTGG  
GCGTTGAATACAGTTGGATATCCGACATGATGTCCTTCAGTACGACATCGTTGCTTGTGGGGCCGGCGT  
CCGCGTGTGATGACGTGGAGATGTCTACTAATTTTGCAATGAGAGAAGAAGACGAGTCATTGTTTGA  
GACCTTGATGAACTGCCGGAATGCTCTCTGGTTTTTCGGAGAAATCAAGGAAACATTGTTGAAAGGTG  
TAATGCCACTGCTCCACTTTGTGGTAGCACGGGATGA

>*HuWRKY70*

**ATGGATCATCTAATTATAGCCC**AAATCATTGAAAATTTAGAGAGAGGCAGAGACTCTGTTTCATCACATCA  
GAGACCTCCTGAACCAACGGCCAGGATTAACCACTGATCACGATGATCAGGGCTACTCCAAAGGCCTT  
GATGATCATTCAATGGTGGCCCTGAATGCACTGGATTATGCCCTCTCTATGCTCCATAACCCTGATAATTT  
CAGCTCCGAGGATAACCAATTTGGGAATTCTAACTCTCATGATTCGGCTGCTGAGACTCCTAGGAAAGA

TAGGAGAGGCTGCTACAAAAGAAGGAGGAATGTTGAATCAAGAGTAGTGGATACCCCAACTCTAACCG  
ATGATGGGTTTGCTTGGAGAAAATATGGCCAGAAAGTGATCCTTAATACTACTCATCCAAGGAATTACTA  
CAGATGCACACACAAGATAGATCAGGGGTGCCAAGCAACAAAACAGGTGCAGCAAATCTCAGAAAAT  
CCCACAAAGCACAGGATAATTTACCATGGCAACCACACCTGCAAAAACCCTCTTAAAATCCCTTCTGTT  
TTTATCAACTCCACTACCCCAGAAAACCCAGATTCTCTGTTTATCTCAGCTTTGAGGCAAACACTCCC  
ACATCCCAACAGGGCCTTAACCATCCAACCCCCTCAAATTTCTTCTTCCCCAACAATATGGTGAAGCAG  
GAGTACGGACCCTTCAAGGCGGAGACGCCATCAGCACCGTCTGATCATCATCAGGACCATTTCATCACCA  
TCATCCCCTGATCGAGCCACCACTACCCCTGGTTCTGAGATCTCATCAGGAGAGGTGCACTCCCTGGGG  
ACTGTGGCGAGTCCCCAGGGAATGGACATCGCGGGGGACTATTACTGCTACATGATGGCTGCTGAGCC  
TGGTGGTTTGGACCAAATCTTGCAGAGTTTGATCTGTGCATGA

>HmoWRKY70

ATGGATCATCTAATTATAGCCCAAATCATTGAAAATTTAGAGAGAGGCAGAGACTCTGTTTCATCACATCA  
GAGACCTCCTGAACCAACGGCCAGGATTAACCACTGATCACGATGATCAGGGCTACTCCAAAGGCCTT  
GATGATCATTCAATGGTGGCCCTGAATGCACTGGATTATGCCCTCTCTATGCTCCATAACCCTGATAATTT  
CAGCTCCGAGGATAACCAATTTGGGAATTCTAACTCTCATGATTCGGCTGCTGAGACTCCTAGGAAAGA  
TAGGAGAGGCTGCTACAAAAGAAGGAGGAATGTTGAATCAAGAGTAGTGGATACCCCAACTCTAACCG  
ATGATGGGTTTGCTTGGAGAAAATATGGCCAGAAAGTGATCCTTAATACTACTCATCCAAGGAATTACTA  
CAGATGCACACACAAGATAGATCAGGGGTGCCAAGCAACAAAACAGGTGCAGCAAATCTCAGAAAAT  
CCCACAAAGCACAGGATAATTTACCATGGCAACCACACCTGCAAAAACCCTCTTAAAATCCCTTCTGTT  
TTTATCAACTCCACTACCCCAGAAAACCCAGATTCTCTGTTTATCTCAGCTTTGAGGCAAACACTCCC  
ACATCCCAACAGGGCCTTAACCATCCAACCCCCTCAAATTTCTTCTTCCCCAACAATATGGTGAAGCAG  
GAGTACGGACCCTTCAAGGCGGAGACGCCATCAGCACCGTCTGATCATCATCAGGACCATTTCATCACCA  
TCATCCCCTGATCGAGCCACCACTACCCCTGGTTCTGAGATCTCATCAGGAGAGGTGCACTCCCTGGGG  
ACTGTGGCGAGTCCCCAGGGAATGGACATCGCGGGGGACTATTACTGCTACATGATGGCTGCTGAGCC  
TGGTGGTTTGGACCAAATCTTGCAGAGTTTGATCTGTGCATGA

>HuWRKY71

ATGTCTAGTAATTCAAGGAAGGATGATATCCCATACAACCTCCTCGACTCATCACCACCACCATTAAACCC  
ATGAAGATCTCTTCTTCCCCTTTCCGAACAACATCTACACTAACCCTACTGCGCAAGCCCTCCAAGAATT  
AGGGGGAGGTTTTGATGACCATAATAGTAACACCAATAATTACATGACCTCCTTCAATGAGTACTTACAT  
GGATCTATGGACTTCAACACCCTCACCAGGAGTCTAGGGTTGTCTTCCCTCCGTCGTCGTCATGGCGGT

GAGAAGCTGGTGGAGATGGAGGTGCAGGCTGCCACCGGAAGCGGGGAGAACCCCGGCACCCCGAAC  
TCGTCGATCTCCTCCTCCTCCACCGAGGCTGCCGAGGATTTGGGTGGGAAGAGCGTGGAGAAGGGTGG  
TAAGGTACAATCTAAAGAAGCATCTATTGAGCAAGGTGGAGAAGAGTCAAAGAAAGGGAACAAGGGA  
AAGAACAAGAAGGGAGAGAAGAAGCAAAGGGAACCAAGATTTGCATTCATGACAAAGAGTGAGATA  
GATCATCTCGAGGATGGGTATCGATGGAGAAAATATGGGCAAAAGGCCGTCAAGAACAGTCCTTATCC  
GAGGAGCTACTATCGCTGCACAACACAAAAGTGCACGGTGAAGAAGAGAGTAGAGCGATCGTTCCAA  
GACCCCTCCATCGTGATCACAACCTACGAGGGCCAACACAACCACCCAGTTCCGGCCACACTACGTGG  
CCATGCAGCCTTTCTGCCGCATTACTCCATGCTAACAACACCAACACCAGCATTAGCACCATCTTCGAG  
CTTTCCTCAGGAGTTACTAGCTCAACTAGGGCATGGTCGAGGAGGTATTAACACCGGTGCTTCTTTCTC  
TTTTCAACAGCTCCCCCACTTCCAACAACATCAGCTTCATCATCGTCGTGCTCAACAACCTATGCCAAA  
TGATGACTACGGGCTTTTGCAAGATGTTGTGCCTTCCTTCCTTCTGAAGCAAGAGCACCCCTTAG

>*HmoWRKY71*

ATGTCTAGTAATTCAAGGAAGGATGATATCCCATAACAACCTCCTCGACTCATCACCACCACCATTAAACCC  
ATGAAGATCTCTTCTTCCCCTTTCCGAACAACATCTACACTAACCTACTGCGCAAGCCCTCCAAGAATT  
AGGGGGAGGTTTTGATGACCATAATAGTAACACCAATAACTACATGACCTCCTTCAATGAGTACTTACAT  
GGATCTATGGACTTCAACGCCCTCACCAGGAGTCTAGGGTTGTCTTCCTCCGTCGTGCTCAATGGCGGT  
GAGAAGGTGGTGGAGATGGAGGTGCAGGCTGCCACCGGAAGCGGGGAGAACCCCGGCACCCCGAAC  
TCGTCGATCTCCTCCTCCTCCACCGAGGCTGCCGAGGATTTGGGTGGGAAGAGCGTGGAGAAGGGTGG  
TAAGGTACAATCTAAAGAAGCATCTATTGAGCAAGGTGGAGAAGAGTCAAAGAAAGGGAACAAGGGA  
AAGAACAAGAAGGGAGAGAAGAAGCAAAGGGAACCAAGATTTGCATTCATGACAAAGAGTGAGATA  
GATCATCTCGAGGATGGGTATCGATGGAGAAAATATGGGCAAAAGGCCGTCAAGAACAGTCCTTATCC  
GAGGAGCTACTATCGCTGCACAACACAAAAGTGCACGGTGAAGAAGAGAGTAGAGC  
GATCGTTCCAAGACCCCTCCATCGTGATCACAACCTACGAGGGCCAACACAACCACCCAGTTCCGGCC  
ACACTACGTGGCCATGCAGCCTTTCTGCCGCATTACTCCATGCTAACAACACCAACACCAGCATTAGCA  
CCATCTTCGAGCTTTCTCAGGAGTTACTAGCTCAACTAGGGCATGGTCGAGGAGGTATTAACACCGGT  
GCTTCTTTCTCTTTTCAACAGCTCCCCCACTTCCAACAACATCAGCTTCATCATCGTCGTGCTCAACAAC  
TTATGCCAAATGATGACTACGGGCTTTTGCAAGATGTTGTGCCTTCCTTCCTTCTGAAGCAAGAGCACCC  
CTTAG

>*HuWRKY72*

ATGGACGCTAATCGAGAGACCCGTAGCGTCAACAATGGAGCCAAAGAAGAAAAAGATGTCGAAAGCG

TCAGCCATGATAATGACTACAAAGAAGAGACGAAGGTGAGATTCAAAGATGAGCATGATAAGAGCTCC  
AAAACCTCTTCCCCAAAACATGAAAATCCAAGGATTTGCAAAGAGGAGGATGAACTTGAATCTGCAAA  
AGAAGAAAATGAAAGGCTAAAAAAGATGCTGGAACAAGTTGAGAATGATTACCAATCCCTGCAAAGG  
CGCTTCTTCAACATCTTTCAACATGAACCTCCCCTGCAATCAGCACAAAAGTCTGTGAGCAATGATACT  
CAAAAGGAAGAAGAAGAACCCGAAGTTTCGCTTTGTCTTGGGTACAGACTCCAACGAAACATGATA  
ACACTGGCAGCTCCAGCAAAGACAAAGTGGATGCTGAGCTGATGGAGGAAGAGCTATCTCTTGGACTA  
GACTTGAAATCCTCACCTAAAGTTGATTTAACAGAGACAGGATCGGAAAAGAGTGATGGCATTGAAGA  
TATGAGAGAAGATGAACGAGGAGAGACTTGGCCTCCCAGTAAAGTTTTGAACACAATGAAAAAAGC  
AGAAAGGGCGAAGAGCTTCCAGAACCAAACAATGCAAAAAGAGCAAGAGTTTGTGTACGAGCGAGG  
TGCGATACACCAACAATGAATGATGGTTGCCAATGGAGAAAATATGGGCAGAAAACCTGCCAAAGGAAA  
TCCTTGTCTCGTGCATACTATCGCTGCACGGTAGCACCATCATGTCCAGTCAGGAAACAGGTGCAGAG  
ATGTTCAAGAGGACATGTCTATTTTAATAACCACCTATGAAGGGACACACAACCACCCACTTACTGTAGC  
AGCCACAGCCATGGCTTCCACAACCTCAGCTGCAGCATCCATGCTCTTATCTGGCTCATCAACCTCAA  
AGTCCTTAGTTCTCTGCTCCCATAACTTCAACTACTAATCTTAATGGATTGAACTTCACTGTCTACAAC  
AATGCAAGAACAGGGCAATTCAACTTACCTAGTTCTTCTTACCAGCACCACCAACAATCACCTGGAT  
CTCACTGGCCCTCATTCCTCGCATTTCAAGCAGGCAATTCTCAAATATTTTCCATCCAAGTACTCGTCCA  
GAAGCCTCGATTTCTCTTCTTCAAGCAAACACGTTTGCAACTGCTTGGAACAATCACAGTACTTACA  
TAAATTACGGTCCATTGCCCCTACTAAACTCCTACTGGATCCCTTAGTTTCGGAAAACCAACCCTAC  
AACAATAAGCTACCCTTACATGGAAAGGACCAATCAAGTTGCCACTTCTTCGTCTTCTTCGTTTGCTT  
CTCAACAGCTCTTGACAGAGACACTGACCAAGGTACTTAGTTCAAGACCCAAGTTTCCAGTCAGCCGTA  
GCAGCTGCAATTTCAATGATGGTGGGTGGAAATAATACCCTCAATGCAATGAATCAGGTCAATGCGAAT  
AGTCTGGGTCCAAACTTGAAATGGGGGGATCCAGTTCAAGGGGATTTCAATCAACTCATTGCCTGAGAA  
TGGCAACCCATATACACCAAATTACTCAAACAAGCTGCCATTACCATCAACTTCCAATTCTCCAGCCGT  
GGGAAGCTTCATGCTTCTTCAACCTCAATTTCCATTTTCTCTATCTAAGAGCCTTCTACCTCAGATCTTA  
GAGAGTAG

>HuWRKY74

ATGGAGATTGAAATAGCCAACAAAGTGGCTGTGGAGAGTAGCCACAGGGTTCTCTCTCTCATTGCCA  
AAAACAAGGCTCTCAGTCCCAAACCTAATGGCACAAACTGGGGATGCTGTTTGCAAGTTCAAGAGA  
GTAGTCGATCTCCTAGAGAACAGGTGTGGTCATGCCAGGATGAGAAGATTGAGGAAGTTACCCCCACC

TTTGCCCCAAAAA ACTCTGCTACAAACCCACATTCTAACCCAGAATCTTCACCCAAACCTCTGCAATT  
ACTCCCATCAGGTTTTCTTAGGCACCCAGTTTCAGAAATTGATCAAAAATTCAGAATCCGGCCAACCA  
AAGTGCCCAACAAGATGTTTGGTGAAAGACCAGGCATTGATATTAGTCTATCAGTTAAACCTCCTGGCCA  
GATTCCTACCCAACAAAAGCCTTCTTATGACATCCAATTCTTCCAGCAGCAACAGATGCACCAGCAGAT  
GCTGCAGAGGTTGCAATTCAGCAGCAAATGAAGTTTCACCAGGCTGAGACGATGAACTCCTCCAGGA  
GTGGAAGTGCCCTTAATTTGAAGTTTGATGGGTCAAGTTGTACTCAAACCATGTCATCCAATAGGTCTT  
TTATGTCATCTTTAAGCATAGATGGTAGCATAGCGAATCCAAGTGGAATTCATTCCAATTGATTGGTCT  
GCCTCAGTCATCTGACCCCAATTCGCAGCATCTTAGGAGGAAGTGCCTTGTC AAGGGTGAGGATGGGA  
GTGTCAAATGTGGGAGCAGTGCCAAATGCCATTGCTCAAAGAAGAGGAAACTGAGGATTAAGAGGTC  
GATCAAGGTGCCAGCGATAAGTAACAAGGTTGCAGACATCCCCCAGATGAATACTCATGGAGAAAGT  
ACGGGCAGAAGCCAATTAAGGGGTCACCTCATCCCAGGGGATACTACAAGTGCAGTAGCATGAGAGGC  
TGCCCAGCAAGGAAGCATGTGGAGAGGTGCCTCGAGGATCCTTCGATGCTGATTGTCACATACGAGGG  
TGAGCACAATCATGCCAAGTTAGTAGCATCTCATTCCGCTCACACCTGA

>HmoWRKY74

ATGGAGATTGAAATAGCCAACAAAGTGGCTGTGGAGAGTAGCCACAGGGTTCTCTCTCTCATTTGCCA  
AAAACAAGGCTCTCAGTCCCAAAACCTAATGGCACAACCTGGGGATGCTGTTTGCAAGTTCAAGAG  
AGTAGTCGATCTCCTAGAGAACAGGTGTGGTCATGCCAGGATGAGAAGATTGAGGAAGTTACCCCCAC  
CTTTGCCCCAAAAA ACTCTGCTACAAACCCACATTCTAACCCAGAATCTTCACCCAAACCTCTGCAAT  
TACTCCCATCAGGTTTTCTTAGGCACCCAGTTTCAGAAATTGATCAAAAATTCAGAATCCGGCCAACC  
AAAGTGCCCAACAAGATGTTTGGTGAAAGACCAGGCATTGATATTAGTCTATCAGTTAAACCTCCTGGCC  
AGATTCTACCCAACAAAAGCCTTCTTATGACATCCAATTCTTCCAGCAGCAACAGATGCACCAGCAGA  
TGCTGCAGAGGTTGCAATTCAGCAGCAAATGAAGTTTCACCAGGCTGAGACGATGAACTCCTCCAGG  
AGTGGAAGTGCCCTTAATTTGAAGTTTGATGGGTCAAGTTGTACTCAAACCATGTCATCCAATAGGTCT  
TTTATGTCATCTTTAAGCATAGATGGTAGCATAGCGAATCCAAGTGGAATTCATTCCAATTGATTGGTCT  
GCCTCAGTCATCTGACCCCAATTCGCAGCATCTTAGGAGGAAGTGCCTTGTC AAGGGTGAGGATGGGA  
GTGTCAAATGTGGGAGCAGTGCCAAATGCCATTGCTCAAAGAAGAGGAAACTGAGGATTAAGAGGTC  
GATCAAGGTGCCAGCGATAAGTAACAAGGTTGCAGACATCCCCCAGATGAATACTCATGGAGAAAGT  
ACGGGCAGAAGCCAATTAAGGGGTCACCTCATCCCAGGGGATACTACAAGTGCAGTAGCATGAGAGGC  
TGCCCAGCAAGGAAGCATGTGGAGAGGTGCCTCGAGGATCCTTCGATGCTGATTGTCACATACGAGGG  
TGAGCACAATCATGCCAAGTTAGTAGCATCTCATTCCGCTCACACCTGA

>HuWRKY75

ATGGAGAATAATCCCATGGCTCCCCCTACTTATCACCACCATTAAGTAATTTCCCTTTCTCAACAAACT  
TGTTATTTTCTCATGATAATAACACTAACAATTCCCCCATAATACCGTCTTTTCATCAACATGATCATCAC  
CTTCTAGGGTTGAAGAGAGAGAATAGTAATGAGGCCGGATCGTCGAGTGGTGTAATCAAAGAAGAAGA  
GAAGAAAGAGGGCAAAGAGAAGAAGGTCCGAAGGCATCGATACGCCTTTCATACGAGAAGTCAGGTT  
GATATACTTGATGATGGATACCGATGGAGGAAGTACGGCCAGAAAGCTGTCAAGAACAACAAGTTCCC  
TAGAAGCTATTATCGATGCACACATCCGGGTTGTAATGTGAAGAAGCAAGTGCAAAGATTAACCAAAGA  
TGAAGAGGTAGTGGTGACAACCTATGAAGGGGTTTCATACACACCCAGTTGAGAGATCCACTGATAATTT  
TGAGCATATCTTGAAACAAATGCAGATTTATGTACCTCCTTGA

>HmoWRKY75

ATGGAGAATAATCCCATGGCTCCCCCTACTTATCACCACCATTAAGTAATTTCCCTTTCTCAACAAACT  
TGTTATTTTCTCATGATAATAACACTAACAATTCCCCCATAATACCGTCTTTTCATCAACATGATCATCAC  
CTTCTAGGGTTGAAGAGAGAGAATAGTAATGAGGCCGGATCGTCGAGTGGTGTAATCAAAGAAGAAGA  
GAAGAAAGAGGGCAGAGAGAAGAAGGTCCGAAGGCATCGATACGCCTTTCATACGAGAAGTCAAGTT  
GATATACTTGATGATGGATACCGATGGAGGAAGTACGGCCAGAAAGCTGTCAAGAACAACAAGTTCCC  
TAGAAGCTATTATCGATGCACACATCCGGGTTGTAATGTGAAGAAGCAAGTGCAAAGATTAACCAAAGA  
TGAAGAGGTAGTGGTGACAACCTATGAAGGGGTTTCATACACACCCAGTTGAGAGATCCACTGATAATTT  
TGAGCATATCTTGAAACAAATGCAGATTTATGTACCTCCTTGA
