# Supplementary material for: Genome-Wide Identification of WRKY Gene Family in Pitaya Reveals the Involvement of HmoWRKY42 in Betalain Biosynthesis
Source: MDPI journal article supplement (doi:10.3390/ijms231810568), 2022-09-12
Supplement: s1 [file s1]

**Supplementary Text S2.** Nucleotide sequences of *HmocDOPA5GT1* promoter. W-box (T/C)TGAC(T/C) is indicated in box. Specific primers for promoter cloning are highlighted in yellow. The downstream primer is the reverse complementary sequence. Translation start site (ATG) is shown in red.

>HmoCDOPA5GT1 promoter

TGACTTGGTCAAACGCTAAACGCTATACAAAGGGGGTGTTTGGTAACAACAGCTGTTTGGGATAAAA  
TAACTGTTTGGCAAAATTTTAGCTATTTTGACAAAGTCAACAGCTATTTGGCTACAAAAAACTCTTTTT  
GAAAAAGTTATTTCCATTAGCCTTTTGAGAATAACTTTTTGTAAAAATGATATAATTGTCCATAAGTTTGA  
AAAAATTACACACATCTCATTAAAAATTAATTCATAAATAAGGACATAAATGAAAATTTTACCAACATAT  
TTTTGTAAAAACAACATAATTTTACCAAACACTTTTTATAAAAAACAACATAATATAAACAGCTAATTCAAA  
CAGCCAGCTAACAGCTAACACAAACAGCTAACAACTAACAGCTATTTATCAAATAGGGCCAAAATACT  
GTTGCCGAACACGACCTTAATGATTTATTTAATAGAATGTGTAAACTTTTATAAATGCTCGCATAGTGCAA  
TAATCACGATGTTAATTTGATAAGATAACACACTAAGTACGATCGTCAATGAAATATAAGTGATTCAAAT  
AACGTTTCATCTATGCGAATTTATCAACAATGTAATTTTCTCATCAAATTATGGTTCGGATTATAAATTATT  
AAGAACAATTTTGAAAAATTGATGTGTCATGAATTAAGGATGATAAATAATATGAAAGGTCAATTTGAT  
TCTATGGCACGTGAATAACAATTTTGTTAGCACCTCAAATATATAAATTTGTAAAAACAGATAACTTGT  
GATTAGTGTATCTCCACAGCTTATATCATACACCCGATAGTGTATACTTGTAGAAGTCACATAATTGAAAT  
ACATATTAATAACCGCTCATATGGCAAATACACATTGAAAAAGTATATATATGTGACAATTGAAGTACATG  
CATCCAGGAGTATGTAATAATTTGCTGCCTACTCCCTAGTAAAAATGAGCCCAAATCTTTTTTCATATGTT  
TATGGCCTGTTCTTTTCATGGGTAAATTTCAAATACTAACATCAATCTACTTCAACCATTTTCAATCCAT  
TTCAACACACTTTCACTATTTTAACCAAGTTTAATTTATCACATAAAAAATTCAACATACTTTAACCCACT  
TCAGCTCACATCAACCTACTTCAACCCACTTCATTATTTTGCCACCTCGATAGCTCAATTTACCCACGA  
AAAAAATAGACCCTTAGATTTGGTATTGACTCTCCTATTAGTAGAACCGAGCCCATTTTGGTTTTCCCTA  
GTAAAAAATAAATAAATGGCTGGGAAATCCAAAAATGGGGCTTCCCTTGTTTTTTTGTTTTAAACA  
CTCATTAGCACGGCAATAGTTAGAGTTTAGATTATTTGTAAATCATATTTATTTTCTTTTCAATTTTAAAG  
AGTCATTCTTTTTTTTACCTTAAGAAAAGGAGTTTAAAGTGATGAGGAATTAAGTTGTAAGAAGTTGTA  
TTTGCAATTATAATATATAGTTACATTTTAAAAAAGACGCGTGCTCAAAACATTTGCATTGATCAATTAAA  
CACAAGCTTACGTTTCTCAATTAGAATTTATATAAGCATGCAAATCATCCAATACCATGACCATTGTGTAA  
TTGGACGTACTCTTATGAGAAGAAGCGCCTGACTTGAATTGTACTTCATTTACCATTATAAAAAAATA  
AAATGGCCACTATGGTAAATGGTGCATCATCAATACAACTCTTACTTCAAATCACTTGCCAATGACAAT  
GAGTTTGTTCACGGACAACCTATTTGGTTGGGATAAGTATGAAGCATTATGGCTACTTCCTAAATTCTACT

ATGGCAACTTCTTACAAAATCACCGCCCAAACGCAACAATAATTAATATGGCTTACAAAATCAAATTGA  
CAAATTCTATGGTAACTGTGGATTATTTGACGACACAAATTAGACCTAAAAATACAACCGCTTTTTCACA  
GAGAAGAGAA**GAAAGAGAAAGTGAGAGAAAGAGAGA****ATG**
