# Supplementary material for: Genome-Wide Identification of WRKY Gene Family in Pitaya Reveals the Involvement of HmoWRKY42 in Betalain Biosynthesis
Source: MDPI journal article supplement (doi:10.3390/ijms231810568), 2022-09-12
Supplement: s1 [file s1]

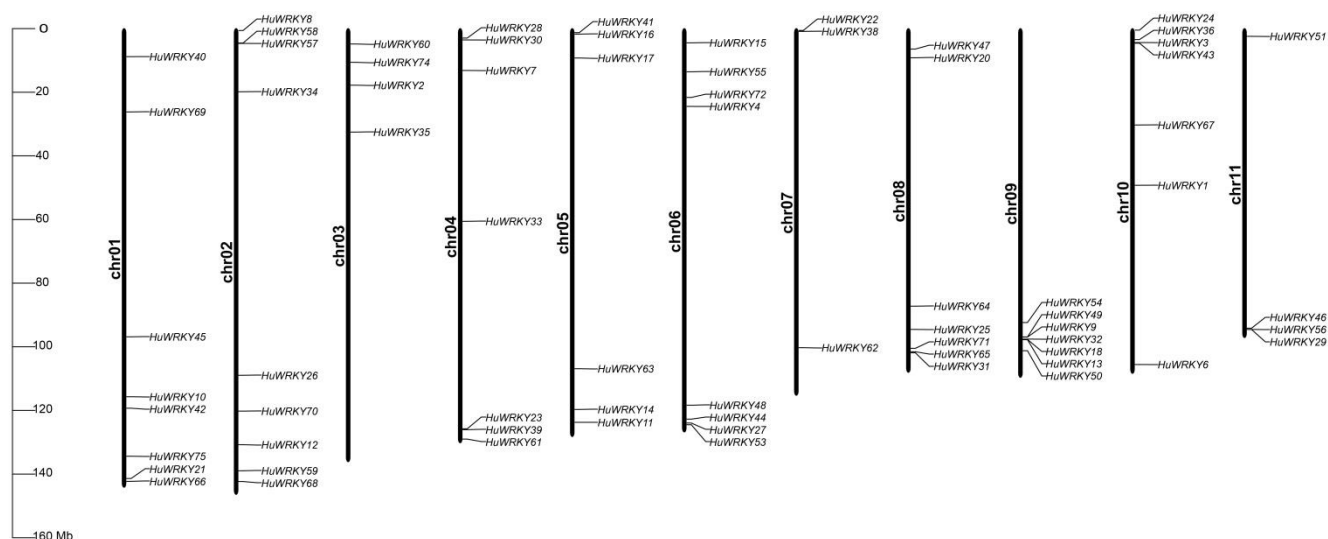

**Figure S2.** Schematic representations of the chromosomal location of the *HuWRKY* genes. Eleven chromosomes with varying lengths are shown in Mb (million base pair) scale in the left, the chromosome number is shown in the middle of each chromosome.
