# Supplementary material for: Genome-Wide Identification of WRKY Gene Family in Pitaya Reveals the Involvement of HmoWRKY42 in Betalain Biosynthesis
Source: MDPI journal article supplement (doi:10.3390/ijms231810568), 2022-09-12
Supplement: s1 [file s1]

**Supplementary Table S1.** Summary of vector primers used in this study.

| Assay                      | Primer sequences                                                     | Restriction Site |  |
|----------------------------|----------------------------------------------------------------------|------------------|--|
| Yeast one/two-hybrid assay | pGADT7-HmoWRKY1-F<br>GGCCATGGAGGCCAGTGAATTCATGGTTGCAAAGGAGGAAGC      |                  |  |
|                            | pGADT7-HmoWRKY1-R<br>GCAGCTCGAGCTCGATGGATCCTCAGCAATTAACAGGCTCAGC     |                  |  |
|                            | pGADT7-HmoWRKY3-F<br>GGCCATGGAGGCCAGTGAATTCATGCCGGAACGATGCCG         |                  |  |
|                            | pGADT7-HmoWRKY3-R<br>GCAGCTCGAGCTCGATGGATCCCTATGTTATTCTCTCTTGTTTTAA  |                  |  |
|                            | pGADT7-HmoWRKY7-F<br>GGCCATGGAGGCCAGTGAATTCATGGCAGTGGAGCTTATGGC      |                  |  |
|                            | pGADT7-HmoWRKY7-R<br>GCAGCTCGAGCTCGATGGATCCCTAAGATGATTCGAGGACCATGG   |                  |  |
|                            | pGADT7-HmoWRKY8-F<br>GGCCATGGAGGCCAGTGAATTCATGCATCTTCTTCTTTATTATG    |                  |  |
|                            | pGADT7-HmoWRKY8-R<br>GCAGCTCGAGCTCGATGGATCCTTAAAGCGAAGTGTAGATTTGC    |                  |  |
|                            | pGADT7-HmoWRKY9-F<br>GGCCATGGAGGCCAGTGAATTCATGGACTCATCTAAGTGGATAC    |                  |  |
|                            | pGADT7-HmoWRKY9-R<br>GCAGCTCGAGCTCGATGGATCCTTAAAGCCATCTCTTAGAATGACT  | <i>EcoRI</i>     |  |
|                            | pGADT7-HmoWRKY11-F<br>GGCCATGGAGGCCAGTGAATTCATGGCTATAGATCTCATGGTAGG  | <i>BamHI</i>     |  |
|                            | pGADT7-HmoWRKY11-R<br>GCAGCTCGAGCTCGATGGATCCTTAAAGATGACTCGAGAATAGACG |                  |  |
|                            | pGADT7-HmoWRKY12-F<br>GGCCATGGAGGCCAGTGAATTCATGTTGAACCAGGAGAACTTG    |                  |  |
|                            | pGADT7-HmoWRKY12-R<br>GCAGCTCGAGCTCGATGGATCCCTACCAAAAGAAGTTATTGAGAA  |                  |  |
|                            | pGADT7-HmoWRKY13-F<br>GGCCATGGAGGCCAGTGAATTCATGTTGAACAGCCAAGGTTTACTC |                  |  |
|                            | pGADT7-HmoWRKY13-R<br>GCAGCTCGAGCTCGATGGATCCCTAACAGAAGAAGTTACTAAGAA  |                  |  |
|                            | pGADT7-HmoWRKY14-F<br>GGCCATGGAGGCCAGTGAATTCATGGACAATTATCAAGGGGATCT  |                  |  |
|                            | pGADT7-HmoWRKY14-R<br>GCAGCTCGAGCTCGATGGATCCTCAAGAAACCCTTTTTTCTTGTT  |                  |  |
|                            | pGADT7-HmoWRKY15-F<br>GGCCATGGAGGCCAGTGAATTCATGGCTGTAGATCTCATGTTGGG  |                  |  |
|                            | pGADT7-HmoWRKY15-R<br>GCAGCTCGAGCTCGATGGATCCTTAAAGATGACTCAAGGATCAGAC |                  |  |
|                            | pGADT7-HmoWRKY16-F                                                   |                  |  |

---

GGCCATGGAGGCCAGTGAATTCATGGATGGGTATGAATTTGG  
pGADT7-HmoWRKY16-R  
GCAGCTCGAGCTCGATGGATCCTCATAATAGATCCATTTC  
pGADT7-HmoWRKY17-F  
GGCCATGGAGGCCAGTGAATTCATGGCTCTTGAAGAAAACTAG  
pGADT7-HmoWRKY17-R  
GCAGCTCGAGCTCGATGGATCCTCAAAATGTAATGGCTGGATATG  
pGADT7-HmoWRKY18-F  
GGCCATGGAGGCCAGTGAATTCATGGACTCATCTAAGTGGATAC  
pGADT7-HmoWRKY18-R  
GCAGCTCGAGCTCGATGGATCCTTAAAGCCATCTCTTAGAATGACT  
pGADT7-HmoWRKY20-F  
GGCCATGGAGGCCAGTGAATTCATGGACGGAGCTCCGGTAGCC  
pGADT7-HmoWRKY20-R  
GCAGCTCGAGCTCGATGGATCCCTAAGGACCCATTAGTATCC  
pGADT7-HmoWRKY21-F  
GGCCATGGAGGCCAGTGAATTCATGGAGGGGGTTGAGGAAGC  
pGADT7-HmoWRKY21-R  
GCAGCTCGAGCTCGATGGATCCTCATGTGTTTGCTGATGGTG  
pGADT7-HmoWRKY23-F  
GGCCATGGAGGCCAGTGAATTCATGGAGAAGGAAGCAGTGTTG  
pGADT7-HmoWRKY23-R  
GCAGCTCGAGCTCGATGGATCCCTACTCTTCAGTCTTCATAATGG  
pGADT7-HmoWRKY24-F  
GGCCATGGAGGCCAGTGAATTCATGACATATGACCCTCATGAA  
pGADT7-HmoWRKY24-R  
GCAGCTCGAGCTCGATGGATCCTCAACAAGAAGGGTGAATTTGC  
pGADT7-HmoWRKY25-F  
GGCCATGGAGGCCAGTGAATTCATGGGGGACAGTGAAGATGC  
pGADT7-HmoWRKY25-R  
GCAGCTCGAGCTCGATGGATCCTCACACAATTTGGCTGTATATAGA  
pGADT7-HmoWRKY26-F  
GGCCATGGAGGCCAGTGAATTCATGGAAGAACTGAAGAAGCAAAA  
pGADT7-HmoWRKY26-R  
GCAGCTCGAGCTCGATGGATCCTTAACGAAGAAGTGAAGTCTAGAA  
pGADT7-HmoWRKY27-F  
GGCCATGGAGGCCAGTGAATTCATGAACGGCTCAGCTCTTG  
pGADT7-HmoWRKY27-R  
GCAGCTCGAGCTCGATGGATCCTTAAAATAGGAAGGATTGAGGG  
pGADT7-HmoWRKY30-F  
GGCCATGGAGGCCAGTGAATTCATGGAACAAGCCTTGTTGATTACC  
pGADT7-HmoWRKY30-R  
GCAGCTCGAGCTCGATGGATCCTTAATAGAACTAGGGAA  
pGADT7-HmoWRKY31-F

---

---

GGCCATGGAGGCCAGTGAATTCATGGAAACAACAGGATGGGGAC  
pGADT7-HmoWRKY31-R  
GCAGCTCGAGCTCGATGGATCCCTAGCTACTTGAATTGACTTT  
pGADT7-HmoWRKY32-F  
GGCCATGGAGGCCAGTGAATTCATGGCCTCTAACCCTGGAATTGCT  
pGADT7-HmoWRKY32-R  
GCAGCTCGAGCTCGATGGATCCCTCAGCAAGACTTGAGCTCAATTCC  
pGADT7-HmoWRKY33-F  
GGCCATGGAGGCCAGTGAATTCATGTCTTCCTCAGTGGCAAGCATA  
pGADT7-HmoWRKY33-R  
GCAGCTCGAGCTCGATGGATCCCTCAATGAAGAAATGAGTCTAAAA  
pGADT7-HmoWRKY34-F  
GGCCATGGAGGCCAGTGAATTCATGTTCCCCTCTTCCATGCCC  
pGADT7-HmoWRKY34-R  
GCAGCTCGAGCTCGATGGATCCCTCAGTACAGAAAAGAATCAAAA  
pGADT7-HmoWRKY35-F  
GGCCATGGAGGCCAGTGAATTCATGGTAATGGATAATAAACGTCTG  
pGADT7-HmoWRKY35-R  
GCAGCTCGAGCTCGATGGATCCCTACGTGTTGCCATATATGGGAG  
pGADT7-HmoWRKY38-F  
GGCCATGGAGGCCAGTGAATTCATGTTGAAGGGTTCAATTGAACA  
pGADT7-HmoWRKY38-R  
GCAGCTCGAGCTCGATGGATCCCTTAAAACTCAAAATTAGGAAAAAT  
pGADT7-HmoWRKY39-F  
GGCCATGGAGGCCAGTGAATTCATGGAGGGCCTTGAGGAAGTTAA  
pGADT7-HmoWRKY39-R  
GCAGCTCGAGCTCGATGGATCCCTCACGAGTTTGTGGATTGTGAAGG  
pGADT7-HmoWRKY40-F  
GGCCATGGAGGCCAGTGAATTCATGGATTATTCAACGTGGTTAAGC  
pGADT7-HmoWRKY40-R  
GCAGCTCGAGCTCGATGGATCCCTTAATCAGTTGAGGTTTGTGCAG  
pGADT7-HmoWRKY41-F  
GGCCATGGAGGCCAGTGAATTCATGGAGTTCAATGGCAACAGTAG  
pGADT7-HmoWRKY41-R  
GCAGCTCGAGCTCGATGGATCCCTATTCTTAGGCTGAGAGA  
pGADT7-HmoWRKY42-F  
GGCCATGGAGGCCAGTGAATTCATGGAGATTGAGATTTTGAAG  
pGADT7-HmoWRKY42-R  
GCAGCTCGAGCTCGATGGATCCCTACAGAATTGACAAGTTGAGATT  
pGADT7-HmoWRKY42-1-F  
GGCCATGGAGGCCAGTGAATTCATGGAGATTGAGATTTTGAAG  
pGADT7-HmoWRKY42-1-R  
GCAGCTCGAGCTCGATGGATCCATTCCTTTGGCCATTTTTTGCCCA  
pGADT7-HmoWRKY42-2-F

---

---

GGCCATGGAGGCCAGTGAATTCATCTCCACAATTAGACAGCATC  
pGADT7-HmoWRKY42-2-R  
GCAGCTCGAGCTCGATGGATCCCTACAGAATTGACAAGTTGAGATT  
pGADT7-HmoWRKY42-3-F  
GGCCATGGAGGCCAGTGAATTCATGGAGATTGAGATTTTGGAAG  
pGADT7-HmoWRKY42-3-R  
GCAGCTCGAGCTCGATGGATCCCTGTTTCATCATCTCCATCTCGATC  
pGADT7-HmoWRKY42-4-F  
GGCCATGGAGGCCAGTGAATTCATGGAGATTGAGATTTTGGAAG  
pGADT7-HmoWRKY42-4-R  
GCAGCTCGAGCTCGATGGATCCGTCTTCAATCGTAGACTTCTGAAG  
pGADT7-HmoWRKY43-F  
GGCCATGGAGGCCAGTGAATTCATGAAGAAGAAGGGGCAAAAGA  
pGADT7-HmoWRKY43-R  
GCAGCTCGAGCTCGATGGATCCCTCATAGGTTTCGCATCCCTGGAG  
pGADT7-HmoWRKY44-F  
GGCCATGGAGGCCAGTGAATTCATGTTGTATTTGTTTCAGGATGGAG  
pGADT7-HmoWRKY44-R  
GCAGCTCGAGCTCGATGGATCCCTATTTCTCTTTGGAAGTAAGTGC  
pGADT7-HmoWRKY45-F  
GGCCATGGAGGCCAGTGAATTCATGGTTGCAAAGGAGGAAGG  
pGADT7-HmoWRKY45-R  
GCAGCTCGAGCTCGATGGATCCCTCAGTTGGTACCCCGAGTCT  
pGADT7-HmoWRKY46-F  
GGCCATGGAGGCCAGTGAATTCATGGAGAAGATGAAGGGAAGTAC  
pGADT7-HmoWRKY46-R  
GCAGCTCGAGCTCGATGGATCCCTACATATGACGTAAGAGATTATC  
pGADT7-HmoWRKY48-F  
GGCCATGGAGGCCAGTGAATTCATGGAGGAGATGTTGAAGAAAGA  
pGADT7-HmoWRKY48-R  
GCAGCTCGAGCTCGATGGATCCCTAGGTACTGGTGGTGCTGCCG  
pGADT7-HmoWRKY49-F  
GGCCATGGAGGCCAGTGAATTCATGAACATAGAGAACAAGAAGCT  
pGADT7-HmoWRKY49-R  
GCAGCTCGAGCTCGATGGATCCCTAAGAAAATAAAACGTATAC  
pGADT7-HmoWRKY50-F  
GGCCATGGAGGCCAGTGAATTCATGACAACAACATCGACTACTAC  
pGADT7-HmoWRKY50-R  
GCAGCTCGAGCTCGATGGATCCTCATTGCTTCTTAGGGGCTTC  
pGADT7-HmoWRKY51-F  
GGCCATGGAGGCCAGTGAATTCATGGAGCAGTTGGTGACCTC  
pGADT7-HmoWRKY51-R  
GCAGCTCGAGCTCGATGGATCCCTATGCGGTTGACTGAGGCTGAG  
pGADT7-HmoWRKY54-F

---

---

GGCCATGGAGGCCAGTGAATTCATGGATGAGAAGAAAATGATAAG  
pGADT7-HmoWRKY54-R  
GCAGCTCGAGCTCGATGGATCCCTAAGAACATAGACGATCATAGT  
pGADT7-HmoWRKY56-F  
GGCCATGGAGGCCAGTGAATTCATGGATGACCACCAAGAAGC  
pGADT7-HmoWRKY56-R  
GCAGCTCGAGCTCGATGGATCCTTAGCCTAAACTAGAAAGAAA  
pGADT7-HmoWRKY57-F  
GGCCATGGAGGCCAGTGAATTCATGAGCAATCCGGGTAAACC  
pGADT7-HmoWRKY57-R  
GCAGCTCGAGCTCGATGGATCCTCATAGATTTCGTATTCCAGGAGA  
pGADT7-HmoWRKY58-F  
GGCCATGGAGGCCAGTGAATTCATGGTGGACAACGACGGTGC  
pGADT7-HmoWRKY58-R  
GCAGCTCGAGCTCGATGGATCCCTATGTTATTCTTTCTTCCTTT  
pGADT7-HmoWRKY59-F  
GGCCATGGAGGCCAGTGAATTCATGGATAGAAACTACCAAACCAC  
pGADT7-HmoWRKY59-R  
GCAGCTCGAGCTCGATGGATCCTCATTGCCTTGGAGCGTCATG  
pGADT7-HmoWRKY60-F  
GGCCATGGAGGCCAGTGAATTCATGGATTACTCAAATTCAACAAC  
pGADT7-HmoWRKY60-R  
GCAGCTCGAGCTCGATGGATCCCTAATCACTTGAACCTCCGCTGGGC  
pGADT7-HmoWRKY66-F  
GGCCATGGAGGCCAGTGAATTCATGGATAGTTACTCTAGTCCTGAG  
pGADT7-HmoWRKY66-R  
GCAGCTCGAGCTCGATGGATCCTTAAAGGTCCAACCTCAAGCTCATC  
pGADT7-HmoWRKY67-F  
GGCCATGGAGGCCAGTGAATTCATGATCGGAGGTACCAAATGCA  
pGADT7-HmoWRKY67-R  
GCAGCTCGAGCTCGATGGATCCTTAGTCAATGTGCATCGTCCT  
pGADT7-HmoWRKY68-F  
GGCCATGGAGGCCAGTGAATTCATGGCCGAGAAGTACAACAA  
pGADT7-HmoWRKY68-R  
GCAGCTCGAGCTCGATGGATCCTTACTCTTCTTTTGCTGTGGCTTGG  
pGADT7-HmoWRKY69-F  
GGCCATGGAGGCCAGTGAATTCATGGTTATGGAAAATAAATATCG  
pGADT7-HmoWRKY69-R  
GCAGCTCGAGCTCGATGGATCCTCATCCCGTGCTACCACAAA  
pGADT7-HmoWRKY70-F  
GGCCATGGAGGCCAGTGAATTCATGGATCATCTAATTATAGCCC  
pGADT7-HmoWRKY70-R  
GCAGCTCGAGCTCGATGGATCCTCATGCACAGATCAAACCTCTGC  
pGADT7-HmoWRKY71-F

---

|                                           |                                                        |               |
|-------------------------------------------|--------------------------------------------------------|---------------|
|                                           | GGCCATGGAGGCCAGTGAATTCATGTCTAGTAATTCAAGGAAGGA          |               |
|                                           | pGADT7-HmoWRKY71-R                                     |               |
|                                           | GCAGCTCGAGCTCGATGGATCCCTAAGGGTGCTCTTGCTTCAG            |               |
|                                           | pGADT7-HmoWRKY74-F                                     |               |
|                                           | GGCCATGGAGGCCAGTGAATTCATGGAGATTGAAATAGCCAAC            |               |
|                                           | pGADT7-HmoWRKY74-R                                     |               |
|                                           | GCAGCTCGAGCTCGATGGATCCTCAGGTGTGAGCGGAATGAGATG          |               |
|                                           | pGADT7-HmoWRKY75-F                                     |               |
|                                           | GGCCATGGAGGCCAGTGAATTCATGGAGAATAATCCCATGGCTC           |               |
|                                           | pGADT7-HmoWRKY75-R                                     |               |
|                                           | GCAGCTCGAGCTCGATGGATCCTCAAGGAGGTACATAAATCTGC           |               |
|                                           | pAbAi-HmocDOPA5GT1-F                                   | <i>Sac</i> I  |
|                                           | AAGCTTGAATTCGAGCTCTGACTTGGTCAAAACGCTAAAC               |               |
|                                           | pAbAi-HmocDOPA5GT1-R                                   | <i>Xho</i> I  |
|                                           | CAGAGCACATGCCTCGAGTCTCTCTTTCTCTCACTTTCTCTTTC           |               |
| Dual LUC<br>assay                         | 62-SK-HmoWRKY30-F                                      |               |
|                                           | TAGAACTAGTGGATCCATGGAACAAGCCTTGTTGATTACC               |               |
|                                           | 62-SK-HmoWRKY30-R                                      |               |
|                                           | GCTTGATATCGAATTCTAATAGAACTAGGGAA                       |               |
|                                           | 62-SK-HmoWRKY35-F                                      |               |
|                                           | TAGAACTAGTGGATCCATGGTAATGGATAATAAACGTCGGG              |               |
|                                           | 62-SK-HmoWRKY35-R                                      | <i>Bam</i> HI |
|                                           | GCTTGATATCGAATTCCTACGTGTTGCCATATATGGGAG                |               |
|                                           | 62-SK-HmoWRKY42-F                                      | <i>Eco</i> RI |
|                                           | TAGAACTAGTGGATCCATGGAGATTGAGATTTTGGAAG                 |               |
|                                           | 62-SK-HmoWRKY42-R                                      |               |
|                                           | GCTTGATATCGAATTCCTACAGAATTGACAAGTTGAGATTATC            |               |
|                                           | 62-SK-HmoWRKY70-F                                      |               |
|                                           | TAGAACTAGTGGATCCATGGATCATCTAATTATAGCCC                 |               |
|                                           | 62-SK-HmoWRKY70-R                                      |               |
|                                           | GCTTGATATCGAATTCTCATGCACAGATCAAACCTCTGC                |               |
|                                           | p0800-HmocDOPA5GT1-F                                   | <i>Kpn</i> I  |
|                                           | CTATAGGGCGAATTGGGTACCTGACTTGGTCAAAACGCTAAAC            |               |
|                                           | p0800-HmocDOPA5GT1-R                                   | <i>Bam</i> HI |
|                                           | CGCTCTAGAACTAGTGGATCCTCTCTCTTTCTCTCACTTTCTCTTTC        |               |
| Transcriptional<br>activation<br>analyses | pBD-62-SK-HmoWRKY42-F                                  |               |
|                                           | CGCCGTCTAGAACTAGTGGATCCATGGAGATTGAGATTTTGGAAG          | <i>Bam</i> HI |
|                                           | pBD-62-SK-HmoWRKY42-R                                  |               |
|                                           | TCGATAAGCTTGATATCGAATTCCTACAGAATTGACAAGTTGAGATT<br>ATC | <i>Eco</i> RI |
|                                           | pGBKT7-HmoWRKY42-F                                     | <i>Eco</i> RI |
|                                           | CATGGAGGCCGAATTCATGGAGATTGAGATTTTGGAAG                 |               |
|                                           | pGBKT7-HmoWRKY42-R                                     | <i>Bam</i> HI |
|                                           | CAGGTCGACGGATCCCTACAGAATTGACAAGTTGAGATTATC             |               |

|                             |                                         |                 |
|-----------------------------|-----------------------------------------|-----------------|
| Subcellular<br>localization | pC18-HmoWRKY42-F                        | <i>Hind</i> III |
|                             | GGTATCGATAAGCTTATGGAGATTGAGATTTTGAAG    |                 |
|                             | pC18-HmoWRKY42-R                        | <i>Bam</i> HI   |
|                             | CATACTAGTGGATCCCAGAATTGACAAGTTGAGATTATC |                 |
| Gene silence<br>assay       | pTRV2-HmoWRKY42-F                       | <i>Bam</i> HI   |
|                             | GCCTCCATGGGGATCCAAGGCAGAGCAGAGCCACGAA   |                 |
|                             | pTRV2-HmoWRKY42-R                       | <i>Sma</i> I    |
|                             | CTTCGGGACATGCCCCGGGGGTTGCGGTCTGGGAGAAGA |                 |
