# Supplementary material for: Genome-Wide Identification of WRKY Gene Family in Pitaya Reveals the Involvement of HmoWRKY42 in Betalain Biosynthesis
Source: MDPI journal article supplement (doi:10.3390/ijms231810568), 2022-09-12
Supplement: s1 [file s1]

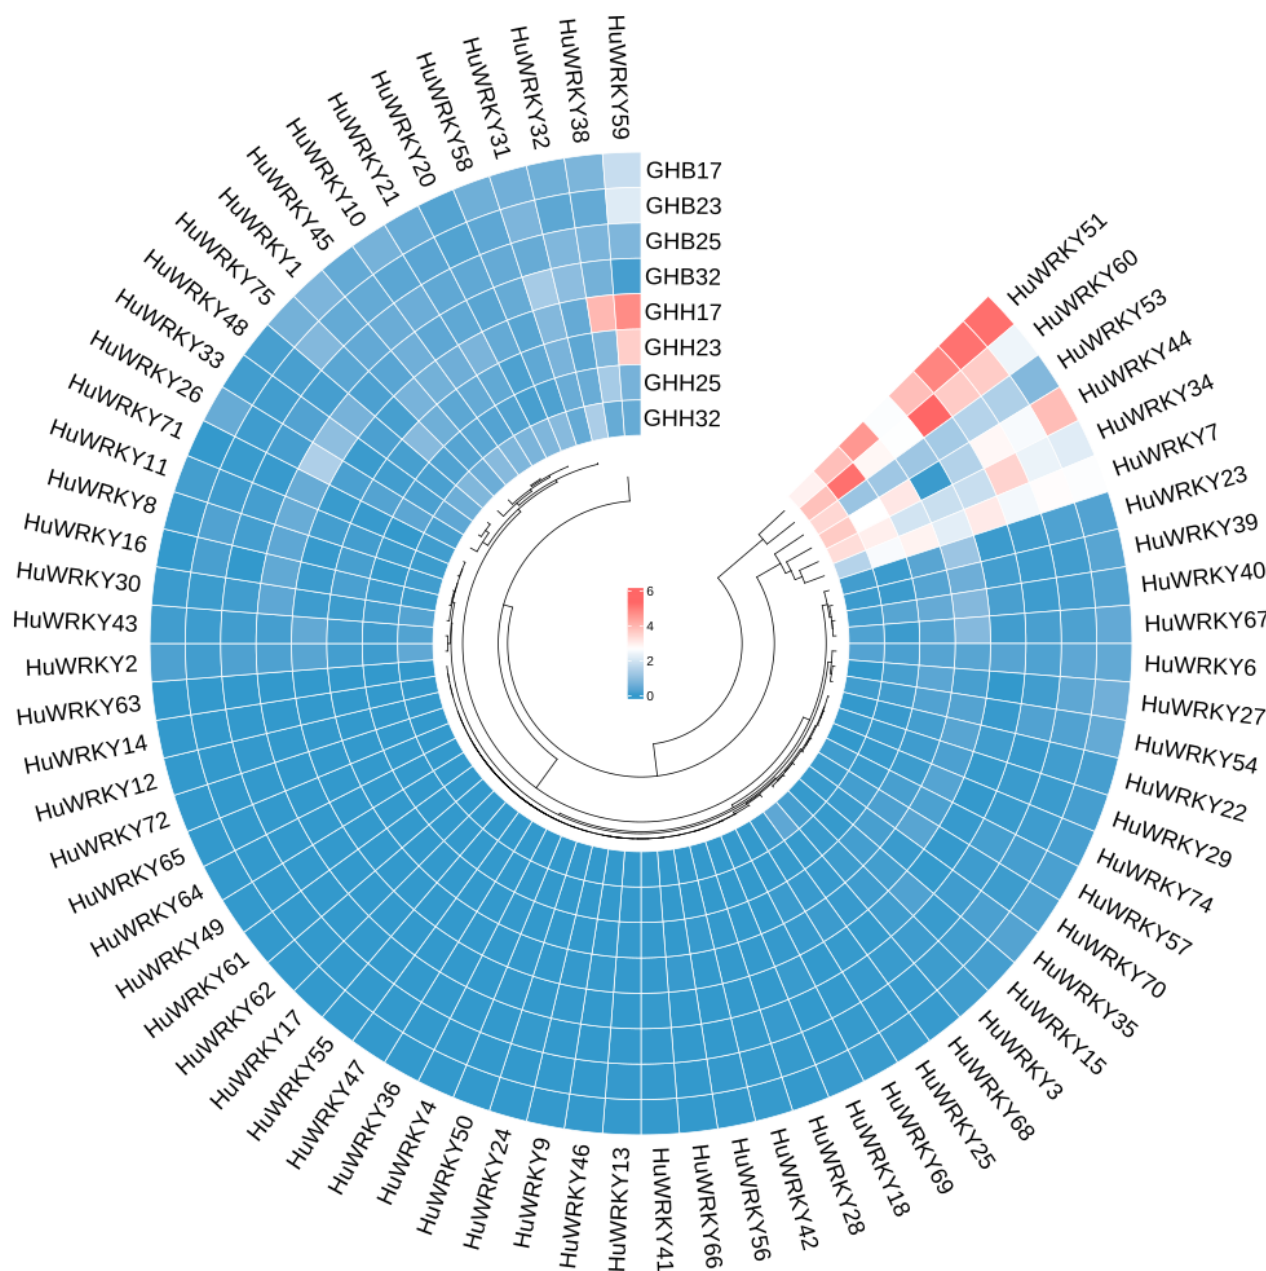

**Figure S1.** The expression heatmap of *WRKY* genes according to the RNA-Seq datasets of ‘Guanhuahong’ (GHH) and ‘Guanhuabai’ (GHB) pitaya pulps. The color bar represents the  $\log_2(\text{FPKM})$  and ranges from blue (low expression) to red (high expression).
