# Supplementary material for: Genome-Wide Identification of WRKY Gene Family in Pitaya Reveals the Involvement of HmoWRKY42 in Betalain Biosynthesis
Source: MDPI journal article supplement (doi:10.3390/ijms231810568), 2022-09-12
Supplement: s1 [file s1]

**Supplementary Table S2.** Characteristics of the 70 *HuWRKY* genes in pitaya.

| Gene names      | GenBank number | ORF (bp) | Length (aa) | Molecular weight (kDa) | pI   |
|-----------------|----------------|----------|-------------|------------------------|------|
| <i>HuWRKY1</i>  | HU10G01510.1   | 1314     | 437         | 48.23                  | 6.35 |
| <i>HuWRKY10</i> | HU01G01634.1   | 2184     | 727         | 78.88                  | 8.04 |
| <i>HuWRKY11</i> | HU05G01931.1   | 972      | 323         | 34.76                  | 9.62 |
| <i>HuWRKY12</i> | HU02G02777.1   | 690      | 229         | 26.31                  | 9.11 |
| <i>HuWRKY13</i> | HU09G01343.1   | 717      | 238         | 27.22                  | 9.42 |
| <i>HuWRKY14</i> | HU05G01710.1   | 1299     | 432         | 47.41                  | 5.49 |
| <i>HuWRKY15</i> | HU06G00411.1   | 978      | 325         | 35.75                  | 9.72 |
| <i>HuWRKY16</i> | HU05G00106.1   | 801      | 266         | 29.54                  | 6.55 |
| <i>HuWRKY17</i> | HU05G00484.1   | 792      | 263         | 29.36                  | 9.39 |
| <i>HuWRKY18</i> | HU09G01339.1   | 948      | 315         | 35.63                  | 8.24 |
| <i>HuWRKY2</i>  | HU03G01517.1   | 2241     | 746         | 81.04                  | 5.85 |
| <i>HuWRKY20</i> | HU08G00283.1   | 1785     | 594         | 63.51                  | 6.26 |
| <i>HuWRKY21</i> | HU01G02705.1   | 1047     | 348         | 38.65                  | 9.51 |
| <i>HuWRKY22</i> | HU07G00041.1   | 1080     | 359         | 38.46                  | 5.84 |
| <i>HuWRKY23</i> | HU04G01891.1   | 1146     | 381         | 40.96                  | 5.5  |
| <i>HuWRKY24</i> | HU10G00045.1   | 585      | 194         | 22.74                  | 5.64 |
| <i>HuWRKY25</i> | HU08G01332.1   | 2367     | 788         | 85.71                  | 5.3  |
| <i>HuWRKY26</i> | HU02G02539.1   | 1116     | 371         | 41.39                  | 7.61 |
| <i>HuWRKY27</i> | HU06G02562.1   | 1221     | 406         | 44.65                  | 5.6  |
| <i>HuWRKY28</i> | HU04G00262.1   | 762      | 253         | 27.43                  | 5.95 |
| <i>HuWRKY29</i> | HU11G01744.1   | 1119     | 372         | 39.55                  | 6.24 |
| <i>HuWRKY3</i>  | HU10G00405.1   | 1518     | 505         | 54.91                  | 6.41 |
| <i>HuWRKY30</i> | HU04G00301.1   | 1062     | 353         | 39.18                  | 5.67 |
| <i>HuWRKY31</i> | HU08G01942.1   | 1836     | 611         | 65.61                  | 6.44 |
| <i>HuWRKY32</i> | HU09G01332.1   | 1683     | 560         | 60.74                  | 8.87 |
| <i>HuWRKY33</i> | HU04G01010.1   | 1626     | 541         | 59.92                  | 6.18 |
| <i>HuWRKY34</i> | HU02G01423.1   | 1359     | 452         | 49.79                  | 7.17 |
| <i>HuWRKY35</i> | HU03G01848.1   | 879      | 292         | 32.1                   | 6.21 |
| <i>HuWRKY36</i> | HU10G00322.1   | 1455     | 484         | 52.59                  | 8.44 |
| <i>HuWRKY38</i> | HU07G00077.1   | 1098     | 365         | 40.84                  | 6.05 |
| <i>HuWRKY39</i> | HU04G01916.1   | 1056     | 351         | 38.56                  | 9.59 |
| <i>HuWRKY4</i>  | HU06G01192.1   | 1296     | 431         | 47.41                  | 8.47 |
| <i>HuWRKY40</i> | HU01G00584.1   | 1065     | 354         | 38.78                  | 6.91 |
| <i>HuWRKY41</i> | HU05G00064.1   | 1092     | 363         | 40.39                  | 6.13 |
| <i>HuWRKY42</i> | HU01G01699.1   | 1491     | 496         | 54.35                  | 6.51 |
| <i>HuWRKY43</i> | HU10G00427.1   | 576      | 191         | 21.62                  | 9.13 |
| <i>HuWRKY44</i> | HU06G02430.1   | 1374     | 457         | 50.89                  | 9.14 |
| <i>HuWRKY45</i> | HU01G01395.1   | 1527     | 508         | 57.08                  | 5.96 |
| <i>HuWRKY46</i> | HU11G01694.1   | 1098     | 365         | 40.54                  | 6.86 |
| <i>HuWRKY47</i> | HU08G00218.1   | 1473     | 490         | 53.02                  | 6.07 |
| <i>HuWRKY48</i> | HU06G02188.1   | 1209     | 402         | 43.74                  | 5.91 |
| <i>HuWRKY49</i> | HU09G01312.1   | 441      | 146         | 17.07                  | 9.37 |

|                 |              |      |     |       |       |
|-----------------|--------------|------|-----|-------|-------|
| <i>HuWRKY50</i> | HU09G01525.1 | 516  | 171 | 19.05 | 5.82  |
| <i>HuWRKY51</i> | HU11G00035.1 | 1146 | 381 | 41.06 | 9.51  |
| <i>HuWRKY53</i> | HU06G02594.1 | 1335 | 444 | 50.22 | 6.95  |
| <i>HuWRKY54</i> | HU09G01148.1 | 1053 | 350 | 40.03 | 6.49  |
| <i>HuWRKY55</i> | HU06G00952.1 | 1026 | 341 | 37.86 | 6.05  |
| <i>HuWRKY56</i> | HU11G01740.1 | 660  | 219 | 25.07 | 6.91  |
| <i>HuWRKY57</i> | HU02G00385.1 | 951  | 316 | 34.92 | 6.34  |
| <i>HuWRKY58</i> | HU02G00374.1 | 1476 | 491 | 53.62 | 8.09  |
| <i>HuWRKY59</i> | HU02G03012.1 | 528  | 175 | 20.34 | 5.19  |
| <i>HuWRKY6</i>  | HU10G01980.1 | 1884 | 627 | 68.01 | 6.45  |
| <i>HuWRKY60</i> | HU03G00514.1 | 1074 | 357 | 39.04 | 6.86  |
| <i>HuWRKY61</i> | HU04G02201.1 | 1896 | 631 | 67.58 | 6.24  |
| <i>HuWRKY62</i> | HU07G01666.1 | 1041 | 346 | 39.46 | 6.16  |
| <i>HuWRKY63</i> | HU05G01336.1 | 606  | 201 | 22.44 | 6.78  |
| <i>HuWRKY64</i> | HU08G01085.1 | 894  | 297 | 33.4  | 7.2   |
| <i>HuWRKY65</i> | HU08G01913.1 | 861  | 286 | 31.46 | 6.08  |
| <i>HuWRKY66</i> | HU01G02778.1 | 684  | 227 | 25.43 | 9.2   |
| <i>HuWRKY67</i> | HU10G01349.1 | 153  | 50  | 5.73  | 10.12 |
| <i>HuWRKY68</i> | HU02G03246.1 | 1185 | 394 | 42.51 | 5.95  |
| <i>HuWRKY69</i> | HU01G00960.1 | 855  | 284 | 31.13 | 5.2   |
| <i>HuWRKY7</i>  | HU04G00611.1 | 1035 | 344 | 36.98 | 9.7   |
| <i>HuWRKY70</i> | HU02G02628.1 | 939  | 312 | 34.82 | 5.99  |
| <i>HuWRKY71</i> | HU08G01835.1 | 1020 | 339 | 37.56 | 7.26  |
| <i>HuWRKY72</i> | HU06G01151.1 | 1719 | 572 | 62.84 | 5.92  |
| <i>HuWRKY74</i> | HU03G01032.1 | 1074 | 357 | 39.99 | 9.84  |
| <i>HuWRKY75</i> | HU01G02174.1 | 525  | 174 | 20.31 | 9.28  |
| <i>HuWRKY8</i>  | HU02G00037.1 | 792  | 263 | 30.38 | 9.05  |
| <i>HuWRKY9</i>  | HU09G01313.1 | 936  | 311 | 35.17 | 8.43  |
