# Supplementary material for: Genome-Wide Identification of WRKY Gene Family in Pitaya Reveals the Involvement of HmoWRKY42 in Betalain Biosynthesis
Source: MDPI journal article supplement (doi:10.3390/ijms231810568), 2022-09-12
Supplement: s1 [file s1]

**Supplementary Table S3.** Gene duplication and synteny analysis of WRKY genes between pitaya and sugar beet.

| Number | <i>Hylocereus undatus</i> |            | <i>Beta vulgaris</i> |                |
|--------|---------------------------|------------|----------------------|----------------|
|        | Chromosome location       | Gene names | Chromosome location  | GenBank number |
| 1      | Chr02                     | HuWRKY8    | Chr06                | 0KMT07420      |
| 2      | Chr05                     | HuWRKY11   | Chr06                | 0KMT09751      |
| 3      | Chr06                     | HuWRKY15   | Chr06                | 0KMT09751      |
| 4      | Chr10                     | HuWRKY24   | Chr06                | 0KMT07420      |
| 5      | Chr10                     | HuWRKY3    | Chr06                | 0KMT06985      |
| 6      | Chr10                     | HuWRKY36   | Chr06                | 0KMT07123      |
| 7      | Chr01                     | HuWRKY21   | Chr05                | 0KMT10289      |
| 8      | Chr04                     | HuWRKY23   | Chr05                | 0KMT09995      |
| 9      | Chr04                     | HuWRKY61   | Chr05                | 0KMT10375      |
| 10     | Chr04                     | HuWRKY30   | Chr05                | 0KMT11948      |
| 11     | Chr05                     | HuWRKY16   | Chr05                | 0KMT12028      |
| 12     | Chr10                     | HuWRKY6    | Chr08                | 0KMT04131      |
| 13     | Chr02                     | HuWRKY34   | Chr07                | 0KMT05423      |
| 14     | Chr02                     | HuWRKY70   | Chr07                | 0KMT06512      |
| 15     | Chr02                     | HuWRKY26   | Chr07                | 0KMT06634      |
| 16     | Chr09                     | HuWRKY54   | Chr07                | 0KMT06512      |
| 17     | Chr02                     | HuWRKY59   | Chr02                | 0KMT17894      |
| 18     | Chr06                     | HuWRKY4    | Chr02                | 0KMT17318      |
| 19     | Chr09                     | HuWRKY50   | Chr02                | 0KMT17894      |
| 20     | Chr07                     | HuWRKY38   | Chr01                | 0KMT20339      |
| 21     | Chr07                     | HuWRKY22   | Chr01                | 0KMT20406      |
| 22     | Chr11                     | HuWRKY46   | Chr01                | 0KMT20339      |
| 23     | Chr11                     | HuWRKY56   | Chr01                | 0KMT20402      |
| 24     | Chr11                     | HuWRKY29   | Chr01                | 0KMT20406      |
| 25     | Chr01                     | HuWRKY10   | Chr04                | 0KMT12903      |
| 26     | Chr03                     | HuWRKY2    | Chr04                | 0KMT14758      |
| 27     | Chr08                     | HuWRKY25   | Chr04                | 0KMT14758      |
| 28     | Chr08                     | HuWRKY20   | Chr04                | 0KMT12903      |
| 29     | Chr02                     | HuWRKY68   | Chr03                | 0KMT16293      |
| 30     | Chr06                     | HuWRKY53   | Chr03                | 0KMT16079      |
| 31     | Chr06                     | HuWRKY27   | Chr03                | 0KMT16161      |
| 32     | Chr01                     | HuWRKY40   | Chr09                | 0KMT01048      |
| 33     | Chr03                     | HuWRKY60   | Chr09                | 0KMT01048      |
