# Supplementary material for: Genome-Wide Identification of WRKY Gene Family in Pitaya Reveals the Involvement of HmoWRKY42 in Betalain Biosynthesis
Source: MDPI journal article supplement (doi:10.3390/ijms231810568), 2022-09-12
Supplement: s1 [file s1]

**Supplementary Table S4.** Gene duplication and synteny analysis of WRKY genes between pitaya and Arabidopsis.

| Number | <i>Hylocereus undatus</i> |            | <i>Arabidopsis thaliana</i> |                |
|--------|---------------------------|------------|-----------------------------|----------------|
|        | Chromosome location       | Gene names | Chromosome location         | GenBank number |
| 1      | Chr04                     | HuWRKY28   | Chr01                       | AT1G64000.1    |
| 2      | Chr10                     | HuWRKY6    | Chr01                       | AT1G62300.1    |
| 3      | Chr10                     | HuWRKY43   | Chr01                       | AT1G69310.1    |
| 4      | Chr10                     | HuWRKY36   | Chr01                       | AT1G69810.1    |
| 5      | Chr10                     | HuWRKY3    | Chr01                       | AT1G13960.1    |
| 6      | Chr05                     | HuWRKY63   | Chr02                       | AT2G40740.3    |
| 7      | Chr07                     | HuWRKY38   | Chr02                       | AT2G46400.1    |
| 8      | Chr10                     | HuWRKY3    | Chr02                       | AT2G03340.1    |
| 9      | Chr11                     | HuWRKY56   | Chr02                       | AT2G46130.1    |
| 10     | Chr11                     | HuWRKY46   | Chr02                       | AT2G46400.1    |
| 11     | Chr03                     | HuWRKY74   | Chr03                       | AT3G04670.1    |
| 12     | Chr05                     | HuWRKY63   | Chr03                       | AT3G56400.1    |
| 13     | Chr01                     | HuWRKY10   | Chr04                       | AT4G26640.2    |
| 14     | Chr04                     | HuWRKY30   | Chr04                       | AT4G23810.1    |
| 15     | Chr04                     | HuWRKY30   | Chr04                       | AT4G11070.1    |
| 16     | Chr06                     | HuWRKY27   | Chr05                       | AT5G52830.1    |
